# Supplementary material for: Digital Genome-Wide ncRNA Expression, Including SnoRNAs, across 11 Human Tissues Using PolyA-Neutral Amplification
Source: PubMed Central journal article supplement (PMC2909899; doi:10.1371/journal.pone.0011779), 2010-07-26
Supplement: pone.0011779.s006.pdf [file pone.0011779.s006.pdf]

| ncRNA           | transcript  |                                              |        |        | hypothalam |       |       |       |        |       |       |       | skeletal |        |        |
|-----------------|-------------|----------------------------------------------|--------|--------|------------|-------|-------|-------|--------|-------|-------|-------|----------|--------|--------|
|                 | length (nt) | type                                         | max    | mean   | adipose    | colon | heart | us    | kidney | liver | lung  | ovary | muscle   | spleen | testes |
| 7SL             | 160         | RNA, 7SL, cytoplasmic 1                      | 69,850 | 41,002 | 65440      | 45316 | 25030 | 69850 | 23222  | 43189 | 45154 | 16575 | 23968    | 40807  | 52473  |
| U2              | 188         | RNA, U2 small nuclear 1;RNA, U2 small nucle  | 39,804 | 15,283 | 2701       | 423   | 9272  | 4034  | 35798  | 5446  | 39804 | 4563  | 3244     | 34239  | 28592  |
| 7SK             | 310         | RNA, 7SK small nuclear                       | 15,245 | 8,030  | 7591       | 4203  | 5170  | 15245 | 7558   | 9338  | 6794  | 8431  | 7067     | 11165  | 5771   |
| HBII-276        | 77          | small nucleolar RNA, C/D box 87              | 17,141 | 7,834  | 3683       | 5170  | 3529  | 3527  | 4672   | 3170  | 13452 | 10291 | 12899    | 17141  | 8646   |
| HBII-52         | 76          | small nucleolar RNA, C/D box 115             | 52,220 | 6,167  | 13         | 620   | 335   | 52220 | 3232   | 1189  | 368   | 375   | 8108     | 238    | 1139   |
| U3              | 75          | small nucleolar RNA, C/D box 3C;small nucle  | 10,418 | 5,588  | 5663       | 2218  | 3377  | 10418 | 3860   | 6795  | 7464  | 3631  | 4186     | 9034   | 4818   |
| U1              | 159         | RNA, U1 small nuclear 1;RNA, U1 small nucle  | 11,468 | 4,708  | 6923       | 2578  | 2036  | 11468 | 5137   | 7119  | 4268  | 2936  | 2571     | 3605   | 3152   |
| hY3             | 101         | RNA, Ro-associated Y3                        | 11,299 | 4,552  | 3085       | 2037  | 5508  | 11299 | 2754   | 4497  | 4395  | 4313  | 3724     | 5878   | 2582   |
| HBII-85_groupI  | 95          | small nucleolar RNA, C/D box 115             | 14,439 | 4,176  | 910        | 1231  | 2949  | 14439 | 8132   | 991   | 2325  | 5535  | 3021     | 2813   | 3592   |
| U6              | 104         | RNA, U6 small nuclear 2;RNA, U6 small nucle  | 3,152  | 1,442  | 1560       | 969   | 517   | 1261  | 1869   | 869   | 3152  | 856   | 484      | 2210   | 2112   |
| U32             | 73          | small nucleolar RNA, C/D box 32A             | 2,001  | 1,319  | 1242       | 1346  | 344   | 1340  | 879    | 1932  | 1466  | 1396  | 1632     | 2001   | 927    |
| mgU6-53B        | 104         | small nucleolar RNA, C/D box 9               | 2,111  | 1,108  | 745        | 181   | 521   | 1214  | 1451   | 659   | 1423  | 1655  | 939      | 2111   | 1288   |
| HBII-420        | 81          | small nucleolar RNA, C/D box 99              | 2,238  | 1,048  | 770        | 818   | 413   | 891   | 401    | 383   | 1977  | 1609  | 1112     | 2238   | 912    |
| U95             | 63          | small nucleolar RNA, C/D box 95              | 2,354  | 1,043  | 774        | 874   | 336   | 852   | 778    | 439   | 1312  | 1432  | 1163     | 2354   | 1163   |
| U14-3           | 91          | small nucleolar RNA, C/D box 14A             | 3,005  | 958    | 325        | 648   | 742   | 326   | 1381   | 389   | 1320  | 1141  | 556      | 3005   | 701    |
| U29             | 65          | small nucleolar RNA, C/D box 29              | 1,792  | 866    | 1052       | 928   | 321   | 518   | 540    | 540   | 882   | 1792  | 659      | 1726   | 572    |
| U97             | 142         | small nucleolar RNA, C/D box 97              | 2,018  | 853    | 276        | 338   | 681   | 155   | 1768   | 174   | 1320  | 758   | 790      | 2018   | 1106   |
| H19             | 183         | H19, imprinted maternally expressed transcr  | 5,129  | 825    | 581        | 114   | 1180  | 136   | 167    | 375   | 146   | 558   | 5129     | 168    | 521    |
| U4              | 91          | RNA, U4 small nuclear 1;small Cajal body-spe | 1,658  | 796    | 1163       | 1658  | 286   | 1482  | 1009   | 576   | 767   | 208   | 245      | 573    | 791    |
| U59             | 75          | small nucleolar RNA, C/D box 59A             | 1,352  | 773    | 633        | 817   | 469   | 617   | 1183   | 900   | 835   | 537   | 1352     | 818    | 338    |
| U76             | 81          | small nucleolar RNA, C/D box 76              | 1,187  | 750    | 677        | 840   | 257   | 659   | 600    | 808   | 1143  | 1145  | 410      | 1187   | 524    |
| ACA3            | 78          | small nucleolar RNA, H/ACA box 3;small nucl  | 946    | 653    | 844        | 132   | 328   | 740   | 495    | 875   | 939   | 709   | 430      | 946    | 743    |
| hY1             | 110         | RNA, Ro-associated Y1                        | 1,873  | 646    | 341        | 333   | 664   | 1873  | 601    | 188   | 897   | 492   | 442      | 838    | 431    |
| ACA14b          | 91          | small nucleolar RNA, H/ACA box 14B           | 2,084  | 629    | 657        | 572   | 179   | 795   | 401    | 306   | 684   | 421   | 258      | 563    | 2084   |
| U28             | 71          | small nucleolar RNA, C/D box 28              | 1,262  | 612    | 412        | 681   | 250   | 443   | 586    | 435   | 782   | 904   | 329      | 1262   | 651    |
| 14q(l-6)        | 75          | small nucleolar RNA, C/D box 113-6           | 2,545  | 563    | 179        | 92    | 180   | 2545  | 142    | 126   | 124   | 1428  | 166      | 363    | 848    |
| U13             | 98          | small nucleolar RNA, C/D box 13              | 871    | 556    | 531        | 594   | 287   | 491   | 356    | 750   | 618   | 385   | 710      | 871    | 525    |
| ACA42           | 132         | small nucleolar RNA, H/ACA box 42            | 1,164  | 489    | 634        | 139   | 478   | 385   | 379    | 136   | 753   | 375   | 128      | 1164   | 808    |
| ACA37           | 127         | small nucleolar RNA, H/ACA box 37            | 996    | 456    | 561        | 176   | 266   | 364   | 480    | 270   | 437   | 397   | 213      | 855    | 996    |
| ACA20           | 132         | small nucleolar RNA, H/ACA box 20            | 1,149  | 413    | 184        | 101   | 183   | 206   | 408    | 366   | 610   | 633   | 175      | 1149   | 529    |
| U11             | 133         | RNA, U11 small nuclear                       | 987    | 400    | 987        | 410   | 137   | 609   | 415    | 151   | 664   | 67    | 88       | 210    | 662    |
| U104            | 80          | small nucleolar RNA, C/D box 104             | 790    | 395    | 249        | 333   | 136   | 189   | 279    | 499   | 597   | 546   | 485      | 790    | 237    |
| hY4             | 91          | RNA, Ro-associated Y4                        | 824    | 369    | 284        | 153   | 229   | 550   | 293    | 431   | 824   | 263   | 104      | 720    | 211    |
| U53             | 75          | small nucleolar RNA, C/D box 53              | 887    | 310    | 125        | 104   | 104   | 252   | 395    | 238   | 302   | 344   | 887      | 437    | 223    |
| U71a            | 138         | small nucleolar RNA, H/ACA box 71A           | 848    | 305    | 190        | 612   | 102   | 156   | 168    | 233   | 431   | 216   | 67       | 334    | 848    |
| U54             | 63          | small nucleolar RNA, C/D box 54              | 704    | 304    | 138        | 62    | 211   | 69    | 431    | 86    | 522   | 339   | 359      | 704    | 418    |
| U91             | 80          | small Cajal body-specific RNA 17             | 965    | 302    | 168        | 261   | 132   | 157   | 244    | 172   | 321   | 965   | 235      | 345    | 322    |
| R38c            | 80          | small nucleolar RNA, C/D box 1C              | 395    | 296    | 303        | 374   | 114   | 206   | 348    | 394   | 352   | 395   | 304      | 295    | 175    |
| mgU6-53         | 109         | small nucleolar RNA, C/D box 8               | 484    | 284    | 151        | 149   | 151   | 286   | 472    | 188   | 307   | 328   | 279      | 484    | 332    |
| U34             | 62          | small nucleolar RNA, C/D box 34              | 596    | 270    | 241        | 187   | 98    | 191   | 182    | 180   | 485   | 376   | 220      | 596    | 214    |
| RNaseMRP        | 265         | ribonuclease MRP RNA                         | 427    | 264    | 243        | 427   | 153   | 332   | 180    | 249   | 289   | 247   | 201      | 331    | 249    |
| U81             | 72          | small nucleolar RNA, C/D box 81              | 388    | 234    | 380        | 327   | 86    | 227   | 208    | 196   | 388   | 295   | 102      | 250    | 113    |
| HBII-85_groupII | 92          | small nucleolar RNA, C/D box 115             | 635    | 227    | 47         | 80    | 189   | 635   | 406    | 36    | 116   | 404   | 281      | 98     | 202    |
| U108            | 148         | small nucleolar RNA, H/ACA box 12            | 792    | 225    | 74         | 218   | 151   | 147   | 119    | 62    | 361   | 103   | 76       | 792    | 369    |
| RNaseP          | 328         | RNA component of RNaseP                      | 443    | 224    | 193        | 90    | 120   | 443   | 259    | 437   | 223   | 161   | 128      | 230    | 186    |
| U85             | 330         | small Cajal body-specific RNA 10             | 486    | 209    | 163        | 126   | 101   | 183   | 186    | 151   | 482   | 105   | 103      | 486    | 211    |
| U82             | 68          | small nucleolar RNA, C/D box 82              | 353    | 198    | 136        | 25    | 87    | 117   | 353    | 185   | 331   | 299   | 193      | 310    | 146    |
| U56             | 71          | small nucleolar RNA, C/D box 56              | 288    | 190    | 288        | 110   | 80    | 283   | 125    | 190   | 232   | 265   | 115      | 286    | 111    |
| U60             | 83          | small nucleolar RNA, C/D box 60              | 265    | 182    | 129        | 208   | 80    | 104   | 165    | 243   | 216   | 221   | 239      | 265    | 137    |
| U50             | 75          | small nucleolar RNA, C/D box 50A             | 403    | 182    | 137        | 191   | 114   | 122   | 149    | 3     | 272   | 256   | 258      | 403    | 99     |
| ACA40           | 108         | small nucleolar RNA, H/ACA box 40            | 322    | 157    | 140        | 27    | 91    | 116   | 155    | 220   | 212   | 134   | 110      | 322    | 201    |
| U71b            | 135         | small nucleolar RNA, H/ACA box 71B           | 350    | 143    | 162        | 350   | 36    | 133   | 70     | 136   | 157   | 93    | 63       | 150    | 227    |
| U38a            | 71          | small nucleolar RNA, C/D box 38A             | 202    | 116    | 92         | 178   | 48    | 81    | 70     | 68    | 170   | 153   | 111      | 202    | 109    |

| ncRNA            | transcript  |                                                | max | mean | hypothalam |       |       |     |        |       |      |       | skeletal |        |        |
|------------------|-------------|------------------------------------------------|-----|------|------------|-------|-------|-----|--------|-------|------|-------|----------|--------|--------|
|                  | length (nt) | type                                           |     |      | adipose    | colon | heart | us  | kidney | liver | lung | ovary | muscle   | spleen | testes |
| E2               | 90          | small nucleolar RNA, H/ACA box 62              | 224 | 114  | 110        | 220   | 65    | 112 | 126    | 73    | 184  | 23    | 35       | 76     | 224    |
| U87              | 198         | small Cajal body-specific RNA 5;small nucleol  | 247 | 111  | 123        | 51    | 50    | 74  | 192    | 60    | 218  | 58    | 52       | 247    | 100    |
| HBII-239         | 87          | small nucleolar RNA, C/D box 71                | 253 | 105  | 62         | 72    | 36    | 38  | 117    | 35    | 181  | 166   | 54       | 253    | 136    |
| mgU6-77          | 149         | small nucleolar RNA, C/D box 10                | 187 | 101  | 187        | 69    | 73    | 107 | 77     | 145   | 83   | 130   | 63       | 140    | 38     |
| U22              | 126         | small nucleolar RNA, C/D box 22                | 278 | 98   | 68         | 144   | 49    | 31  | 129    | 17    | 278  | 67    | 44       | 161    | 85     |
| U26              | 75          | small nucleolar RNA, C/D box 26                | 200 | 97   | 57         | 161   | 43    | 87  | 63     | 48    | 175  | 114   | 58       | 200    | 59     |
| HBI-43           | 238         | small nucleolar RNA, C/D box 17                | 275 | 93   | 66         | 275   | 41    | 48  | 190    | 21    | 162  | 18    | 24       | 57     | 122    |
| HBII-202         | 73          | small nucleolar RNA, C/D box 68                | 204 | 90   | 93         | 204   | 24    | 103 | 42     | 46    | 67   | 134   | 65       | 155    | 56     |
| U90              | 330         | small Cajal body-specific RNA 7                | 181 | 90   | 33         | 96    | 60    | 32  | 142    | 26    | 181  | 84    | 128      | 133    | 70     |
| U12              | 156         | RNA, U12 small nuclear                         | 264 | 87   | 245        | 9     | 58    | 264 | 69     | 49    | 65   | 25    | 22       | 46     | 101    |
| ACA55            | 137         | small nucleolar RNA, H/ACA box 55              | 370 | 83   | 54         | 134   | 33    | 25  | 50     | 23    | 141  | 9     | 27       | 49     | 370    |
| U62              | 81          | small nucleolar RNA, C/D box 62B;small nucleol | 183 | 83   | 75         | 21    | 23    | 57  | 71     | 63    | 143  | 102   | 78       | 183    | 96     |
| U14-5            | 92          | small nucleolar RNA, C/D box 14B               | 241 | 79   | 69         | 106   | 12    | 35  | 85     | 49    | 29   | 42    | 175      | 241    | 22     |
| U58b             | 66          | small nucleolar RNA, C/D box 58B               | 203 | 76   | 17         | 27    | 25    | 29  | 103    | 42    | 148  | 110   | 67       | 203    | 62     |
| ACA21            | 133         | small nucleolar RNA, H/ACA box 21              | 172 | 74   | 19         | 21    | 51    | 23  | 95     | 22    | 131  | 93    | 62       | 124    | 172    |
| ACA27            | 133         | small nucleolar RNA, H/ACA box 27              | 198 | 73   | 11         | 4     | 53    | 17  | 70     | 12    | 100  | 100   | 84       | 154    | 198    |
| ACA44            | 132         | small nucleolar RNA, H/ACA box 44              | 226 | 72   | 116        | 34    | 28    | 42  | 49     | 39    | 226  | 57    | 35       | 104    | 62     |
| HBII-85_groupIII | 83          | small nucleolar RNA, C/D box 115               | 242 | 69   | 12         | 14    | 61    | 242 | 138    | 25    | 32   | 79    | 77       | 29     | 45     |
| SNORD119         | 83          | small nucleolar RNA, C/D box 119               | 101 | 64   | 71         | 48    | 45    | 74  | 68     | 37    | 101  | 86    | 44       | 77     | 49     |
| ACA58            | 137         | small nucleolar RNA, H/ACA box 58              | 363 | 63   | 52         | 83    | 8     | 33  | 42     | 5     | 73   | 10    | 8        | 13     | 363    |
| U33              | 78          | small nucleolar RNA, C/D box 33                | 111 | 61   | 51         | 80    | 28    | 34  | 61     | 49    | 80   | 58    | 80       | 111    | 33     |
| E3               | 77          | small nucleolar RNA, H/ACA box 63              | 121 | 56   | 34         | 57    | 24    | 72  | 73     | 38    | 75   | 43    | 26       | 56     | 121    |
| ACA31            | 126         | small nucleolar RNA, H/ACA box 31              | 93  | 54   | 47         | 93    | 30    | 20  | 40     | 81    | 65   | 38    | 43       | 57     | 78     |
| HBII-289         | 115         | small nucleolar RNA, C/D box 89                | 101 | 53   | 48         | 71    | 15    | 62  | 54     | 54    | 81   | 33    | 29       | 101    | 33     |
| U55              | 75          | small nucleolar RNA, C/D box 55                | 105 | 51   | 28         | 34    | 21    | 34  | 44     | 4     | 100  | 105   | 56       | 96     | 42     |
| SNORD121B        | 80          | small nucleolar RNA, C/D box 121B              | 103 | 49   | 22         | 3     | 15    | 37  | 73     | 16    | 71   | 36    | 103      | 69     | 98     |
| ACA36            | 132         | small nucleolar RNA, H/ACA box 36A             | 154 | 49   | 13         | 134   | 19    | 13  | 45     | 7     | 154  | 2     | 3        | 72     | 78     |
| U47              | 65          | small nucleolar RNA, C/D box 47                | 89  | 46   | 75         | 23    | 16    | 62  | 50     | 44    | 54   | 89    | 25       | 56     | 15     |
| mgU2-19/30       | 354         | small Cajal body-specific RNA 9                | 76  | 44   | 41         | 71    | 25    | 76  | 39     | 16    | 44   | 63    | 22       | 51     | 40     |
| ACA6             | 149         | small nucleolar RNA, H/ACA box 6               | 108 | 44   | 49         | 51    | 19    | 40  | 37     | 20    | 104  | 10    | 20       | 26     | 108    |
| U61              | 73          | small nucleolar RNA, C/D box 61                | 70  | 40   | 36         | 31    | 27    | 30  | 51     | 30    | 44   | 70    | 64       | 39     | 13     |
| U21              | 95          | small nucleolar RNA, C/D box 21                | 79  | 38   | 20         | 15    | 20    | 13  | 58     | 16    | 37   | 55    | 73       | 79     | 30     |
| U27              | 72          | small nucleolar RNA, C/D box 27                | 76  | 37   | 34         | 46    | 16    | 26  | 26     | 31    | 51   | 76    | 9        | 68     | 27     |
| ACA60            | 136         | small nucleolar RNA, H/ACA box 60              | 58  | 37   | 50         | 33    | 7     | 55  | 58     | 51    | 58   | 12    | 7        | 42     | 31     |
| U93              | 275         | small Cajal body-specific RNA 13               | 72  | 36   | 25         | 45    | 13    | 25  | 25     | 23    | 37   | 71    | 22       | 72     | 34     |
| ACA23            | 189         | small nucleolar RNA, H/ACA box 23              | 164 | 34   | 35         | 6     | 9     | 26  | 26     | 32    | 33   | 9     | 13       | 24     | 164    |
| ACA61            | 130         | small nucleolar RNA, H/ACA box 61              | 85  | 34   | 40         | 35    | 19    | 22  | 28     | 12    | 85   | 31    | 15       | 51     | 35     |
| mgU2-25/61       | 421         | small Cajal body-specific RNA 2                | 78  | 33   | 16         | 31    | 19    | 28  | 46     | 12    | 78   | 39    | 16       | 45     | 38     |
| U45b             | 71          | small nucleolar RNA, C/D box 45B               | 88  | 33   | 38         | 18    | 2     | 88  | 29     | 69    | 19   | 24    | 34       | 28     | 9      |
| HBI-61           | 179         | small nucleolar RNA, H/ACA box 81              | 108 | 32   | 40         | 24    | 6     | 11  | 54     | 7     | 57   | 4     | 10       | 33     | 108    |
| ACA7             | 138         | small nucleolar RNA, H/ACA box 7A              | 51  | 32   | 26         | 31    | 14    | 25  | 42     | 21    | 31   | 40    | 25       | 51     | 45     |
| HBI-6            | 123         | small nucleolar RNA, H/ACA box 26              | 166 | 31   | 5          | 44    | 6     | 13  | 25     | 10    | 30   | 16    | 9        | 21     | 166    |
| U57              | 72          | small nucleolar RNA, C/D box 57                | 56  | 31   | 52         | 47    | 11    | 56  | 24     | 15    | 41   | 39    | 9        | 35     | 13     |
| HBII-316         | 90          | small nucleolar RNA, C/D box 92                | 51  | 30   | 16         | 19    | 13    | 22  | 39     | 48    | 51   | 22    | 27       | 45     | 26     |
| HBII-234         | 89          | small nucleolar RNA, C/D box 70                | 57  | 30   | 10         | 19    | 16    | 14  | 36     | 26    | 34   | 38    | 57       | 54     | 23     |
| HBII-336         | 75          | small nucleolar RNA, C/D box 93                | 92  | 29   | 24         | 23    | 24    | 3   | 11     | 23    | 49   | 21    | 92       | 31     | 15     |
| U92              | 131         | small Cajal body-specific RNA 8                | 87  | 27   | 18         | 18    | 6     | 8   | 18     | 12    | 40   | 30    | 13       | 47     | 87     |
| U25              | 67          | small nucleolar RNA, C/D box 25                | 55  | 27   | 19         | 45    | 4     | 24  | 20     | 42    | 32   | 27    | 14       | 55     | 12     |
| U24              | 75          | small nucleolar RNA, C/D box 24                | 69  | 26   | 18         | 39    | 9     | 24  | 18     | 26    | 18   | 28    | 16       | 69     | 17     |
| ACA25            | 89          | small nucleolar RNA, H/ACA box 25              | 42  | 25   | 17         | 20    | 42    | 17  | 25     | 15    | 39   | 26    | 11       | 32     | 37     |
| ACA26            | 123         | small Cajal body-specific RNA 4                | 66  | 25   | 22         | 3     | 9     | 18  | 34     | 24    | 66   | 11    | 2        | 33     | 59     |
| U45a             | 84          | small nucleolar RNA, C/D box 45A               | 45  | 25   | 41         | 17    | 14    | 40  | 22     | 24    | 28   | 16    | 23       | 45     | 10     |
| U74              | 69          | small nucleolar RNA, C/D box 74                | 53  | 25   | 23         | 20    | 6     | 18  | 21     | 53    | 24   | 26    | 19       | 39     | 21     |

| ncRNA     | transcript  |                                             | max | mean | hypothalam |       |       |     |        |       |      |       | skeletal |        |        |
|-----------|-------------|---------------------------------------------|-----|------|------------|-------|-------|-----|--------|-------|------|-------|----------|--------|--------|
|           | length (nt) | type                                        |     |      | adipose    | colon | heart | us  | kidney | liver | lung | ovary | muscle   | spleen | testes |
| U6atac    | 122         | snRNA U6atac (U12-dependent splicing)       | 43  | 23   | 20         | 4     | 18    | 16  | 20     | 14    | 43   | 32    | 21       | 34     | 32     |
| U41       | 70          | small nucleolar RNA, C/D box 41             | 64  | 23   | 34         | 45    | 13    | 64  | 15     | 22    | 18   | 12    | 5        | 19     | 4      |
| U23       | 126         | small nucleolar RNA, H/ACA box 75           | 64  | 23   | 36         | 11    | 13    | 21  | 19     | 21    | 20   | 8     | 13       | 21     | 64     |
| ACA51     | 172         | small nucleolar RNA, H/ACA box 51           | 48  | 21   | 9          | 7     | 22    | 19  | 7      | 5     | 30   | 28    | 14       | 48     | 41     |
| U42       | 62          | small nucleolar RNA, C/D box 42A            | 33  | 20   | 19         | 20    | 24    | 26  | 20     | 16    | 33   | 20    | 8        | 23     | 16     |
| hY5       | 76          | RNA, Ro-associated Y5                       | 32  | 20   | 7          | 6     | 18    | 31  | 27     | 12    | 32   | 31    | 6        | 31     | 17     |
| ACA1      | 132         | small nucleolar RNA, H/ACA box 1            | 47  | 19   | 8          | 6     | 11    | 3   | 31     | 25    | 47   | 2     | 4        | 32     | 44     |
| ACA50     | 135         | small nucleolar RNA, H/ACA box 50           | 34  | 19   | 11         | 1     | 9     | 34  | 13     | 26    | 13   | 31    | 21       | 21     | 30     |
| U17b      | 207         | small nucleolar RNA, H/ACA box 73B          | 33  | 19   | 18         | 31    | 8     | 11  | 17     | 10    | 33   | 21    | 8        | 30     | 18     |
| HBII-55   | 76          | small nucleolar RNA, C/D box 110            | 46  | 18   | 16         | 31    | 5     | 46  | 13     | 11    | 19   | 21    | 10       | 22     | 8      |
| ACA34     | 137         | small nucleolar RNA, H/ACA box 34           | 27  | 18   | 17         | 24    | 13    | 27  | 14     | 10    | 21   | 19    | 21       | 16     | 14     |
| U4atac    | 129         | snRNA U4atac (U12-dependent splicing)       | 32  | 18   | 32         | 10    | 13    | 20  | 19     | 9     | 25   | 15    | 8        | 17     | 28     |
| U96a      | 72          | small nucleolar RNA, C/D box 96A            | 59  | 18   | 8          | 17    | 7     | 9   | 24     | 11    | 26   | 17    | 5        | 59     | 12     |
| U58a      | 65          | small nucleolar RNA, C/D box 58A            | 23  | 18   | 23         | 19    | 10    | 23  | 16     | 22    | 13   | 23    | 16       | 19     | 8      |
| U30       | 70          | small nucleolar RNA, C/D box 30             | 34  | 17   | 20         | 16    | 6     | 11  | 10     | 34    | 19   | 18    | 13       | 29     | 11     |
| ACA24     | 131         | small nucleolar RNA, H/ACA box 24           | 39  | 16   | 8          | 6     | 6     | 5   | 21     | 39    | 15   | 12    | 16       | 36     | 15     |
| U36c      | 68          | small nucleolar RNA, C/D box 36C            | 32  | 16   | 25         | 1     | 7     | 8   | 25     | 32    | 12   | 22    | 11       | 22     | 12     |
| U98a      | 129         | small nucleolar RNA, H/ACA box 16A          | 46  | 16   | 11         | 13    | 7     | 3   | 8      | 2     | 46   | 23    | 13       | 42     | 10     |
| U49B      | 49          | small nucleolar RNA, C/D box 49B            | 25  | 16   | 10         | 25    | 18    | 4   | 13     | 19    | 16   | 17    | 21       | 20     | 12     |
| ACA68     | 139         | small Cajal body-specific RNA 21            | 43  | 15   | 12         | 25    | 5     | 15  | 9      | 3     | 21   | 26    | 3        | 43     | 8      |
| HBII-438  | 67          | small nucleolar RNA, C/D box 109            | 107 | 15   | 0          | 4     | 1     | 107 | 7      | 1     | 1    | 7     | 15       | 2      | 25     |
| U89       | 270         | small Cajal body-specific RNA 12            | 45  | 15   | 8          | 45    | 5     | 13  | 9      | 31    | 11   | 10    | 10       | 16     | 6      |
| U77       | 69          | small nucleolar RNA, C/D box 77             | 30  | 14   | 14         | 4     | 7     | 9   | 18     | 15    | 28   | 30    | 3        | 24     | 8      |
| HBII-82   | 95          | small nucleolar RNA, C/D box 111            | 38  | 14   | 2          | 3     | 7     | 4   | 11     | 18    | 16   | 38    | 14       | 29     | 11     |
| U84       | 78          | small nucleolar RNA, C/D box 84             | 20  | 12   | 8          | 5     | 14    | 8   | 15     | 3     | 11   | 15    | 15       | 20     | 16     |
| HBII-295  | 108         | small nucleolar RNA, C/D box 90             | 27  | 12   | 11         | 1     | 8     | 13  | 14     | 12    | 20   | 9     | 5        | 27     | 10     |
| ACA8      | 139         | small nucleolar RNA, H/ACA box 8            | 28  | 12   | 5          | 4     | 8     | 6   | 16     | 3     | 23   | 17    | 6        | 28     | 10     |
| U83       | 76          | small nucleolar RNA, C/D box 117            | 29  | 11   | 8          | 0     | 3     | 6   | 13     | 6     | 29   | 6     | 12       | 27     | 17     |
| U17a      | 87          | small nucleolar RNA, H/ACA box 73A          | 29  | 11   | 7          | 8     | 9     | 3   | 7      | 5     | 24   | 18    | 5        | 29     | 9      |
| U103      | 88          | small nucleolar RNA, C/D box 103A           | 18  | 11   | 7          | 8     | 7     | 11  | 11     | 11    | 15   | 14    | 9        | 18     | 6      |
| HBII-142  | 77          | small nucleolar RNA, C/D box 66             | 27  | 11   | 9          | 11    | 3     | 4   | 9      | 27    | 16   | 13    | 6        | 13     | 4      |
| U3b2      | 216         | small nucleolar RNA, C/D box 3B-2;small nuc | 19  | 10   | 19         | 5     | 5     | 7   | 9      | 7     | 17   | 11    | 14       | 17     | 3      |
| HBII-437  | 72          | small nucleolar RNA, C/D box 108            | 34  | 10   | 2          | 1     | 13    | 34  | 15     | 1     | 2    | 18    | 19       | 6      | 2      |
| HBII-296B | 87          | small nucleolar RNA, C/D box 91B            | 17  | 10   | 7          | 16    | 4     | 7   | 11     | 3     | 10   | 13    | 17       | 11     | 8      |
| HBII-251  | 76          | small nucleolar RNA, C/D box 85             | 17  | 9    | 3          | 1     | 5     | 10  | 15     | 6     | 16   | 17    | 5        | 13     | 8      |
| U83a      | 95          | small nucleolar RNA, C/D box 83A            | 19  | 9    | 7          | 10    | 4     | 4   | 6      | 14    | 15   | 8     | 9        | 19     | 4      |
| U50B      | 72          | small nucleolar RNA, C/D box 50B            | 18  | 9    | 8          | 6     | 2     | 9   | 5      | 7     | 5    | 13    | 14       | 18     | 7      |
| snR39B    | 71          | small nucleolar RNA, C/D box 2              | 50  | 9    | 10         | 0     | 1     | 0   | 7      | 15    | 5    | 3     | 2        | 50     | 2      |
| U19       | 199         | small nucleolar RNA, H/ACA box 74A;small nu | 20  | 8    | 12         | 9     | 1     | 9   | 6      | 2     | 20   | 0     | 4        | 4      | 20     |
| U15b      | 146         | small nucleolar RNA, C/D box 15B            | 14  | 8    | 4          | 14    | 4     | 8   | 5      | 8     | 12   | 8     | 8        | 9      | 3      |
| HBII-99   | 91          | small nucleolar RNA, C/D box 12             | 17  | 7    | 6          | 5     | 2     | 6   | 2      | 16    | 7    | 9     | 17       | 10     | 2      |
| U15a      | 148         | small nucleolar RNA, C/D box 15A            | 29  | 7    | 5          | 6     | 6     | 2   | 9      | 6     | 29   | 0     | 3        | 8      | 8      |
| ACA17     | 133         | small nucleolar RNA, H/ACA box 17           | 19  | 7    | 14         | 7     | 2     | 4   | 4      | 6     | 19   | 6     | 1        | 7      | 7      |
| U38b      | 69          | small nucleolar RNA, C/D box 38B            | 15  | 7    | 3          | 4     | 2     | 2   | 6      | 9     | 15   | 5     | 8        | 14     | 8      |
| U49       | 71          | small nucleolar RNA, C/D box 49A            | 15  | 7    | 7          | 3     | 3     | 9   | 6      | 5     | 13   | 6     | 4        | 15     | 6      |
| U78       | 65          | small nucleolar RNA, C/D box 78             | 25  | 7    | 1          | 2     | 3     | 0   | 4      | 9     | 20   | 7     | 0        | 25     | 3      |
| ACA5      | 131         | small nucleolar RNA, H/ACA box 5A           | 18  | 7    | 4          | 18    | 3     | 3   | 9      | 7     | 6    | 4     | 3        | 9      | 8      |
| ACA54     | 123         | small nucleolar RNA, H/ACA box 54           | 12  | 6    | 9          | 5     | 0     | 12  | 6      | 11    | 3    | 6     | 3        | 12     | 2      |
| U8        | 136         | small nucleolar RNA, C/D box 118            | 14  | 6    | 7          | 3     | 3     | 5   | 4      | 14    | 11   | 4     | 2        | 11     | 5      |
| hTR_TERC  | 451         | telomerase RNA component                    | 40  | 6    | 3          | 2     | 3     | 7   | 1      | 1     | 4    | 4     | 2        | 5      | 40     |
| U36a      | 72          | small nucleolar RNA, C/D box 36A            | 12  | 6    | 9          | 10    | 2     | 6   | 5      | 12    | 7    | 3     | 3        | 9      | 4      |
| U58C      | 66          | small nucleolar RNA, C/D box 58C            | 12  | 6    | 3          | 0     | 3     | 2   | 6      | 6     | 11   | 12    | 8        | 12     | 6      |
| HBII-436  | 75          | small nucleolar RNA, C/D box 107            | 35  | 6    | 4          | 0     | 1     | 35  | 3      | 6     | 3    | 2     | 6        | 4      | 0      |

| ncRNA       | transcript  |                                                 | max | mean | hypothalam |       |       |    |        |       |      |       | skeletal |        |        |
|-------------|-------------|-------------------------------------------------|-----|------|------------|-------|-------|----|--------|-------|------|-------|----------|--------|--------|
|             | length (nt) | type                                            |     |      | adipose    | colon | heart | us | kidney | liver | lung | ovary | muscle   | spleen | testes |
| HBII-95B    | 91          | small nucleolar RNA, C/D box 11B                | 21  | 6    | 2          | 2     | 6     | 2  | 5      | 5     | 7    | 21    | 3        | 13     | 2      |
| BC200       | 200         | brain cytoplasmic RNA 1 (non-protein coding)    | 55  | 6    | 4          | 2     | 2     | 55 | 1      | 0     | 0    | 0     | 0        | 0      | 0      |
| HBII-135    | 74          | small nucleolar RNA, C/D box 65                 | 25  | 6    | 13         | 2     | 0     | 4  | 3      | 25    | 2    | 7     | 3        | 8      | 0      |
| HBII-419    | 68          | small nucleolar RNA, C/D box 98                 | 14  | 6    | 1          | 0     | 2     | 2  | 8      | 1     | 14   | 13    | 3        | 10     | 9      |
| HBII-210    | 78          | small nucleolar RNA, C/D box 69                 | 9   | 6    | 7          | 7     | 4     | 6  | 5      | 5     | 9    | 8     | 5        | 5      | 3      |
| U105        | 85          | small nucleolar RNA, C/D box 105                | 11  | 6    | 5          | 7     | 5     | 2  | 4      | 8     | 6    | 5     | 1        | 11     | 7      |
| U70         | 105         | small nucleolar RNA, H/ACA box 70               | 13  | 5    | 7          | 8     | 2     | 4  | 3      | 2     | 7    | 13    | 4        | 6      | 6      |
| U35A        | 87          | small nucleolar RNA, C/D box 35A                | 13  | 5    | 1          | 11    | 4     | 1  | 7      | 4     | 4    | 8     | 5        | 13     | 1      |
| ACA48       | 133         | small nucleolar RNA, H/ACA box 48               | 11  | 5    | 4          | 3     | 4     | 3  | 6      | 0     | 9    | 6     | 1        | 11     | 9      |
| ACA19       | 127         | small nucleolar RNA, H/ACA box 19               | 13  | 5    | 8          | 1     | 3     | 4  | 7      | 1     | 8    | 0     | 2        | 6      | 13     |
| ACA39       | 136         | small nucleolar RNA, H/ACA box 39               | 17  | 5    | 2          | 7     | 1     | 3  | 7      | 1     | 5    | 1     | 1        | 4      | 17     |
| U99         | 111         | small nucleolar RNA, H/ACA box 57               | 12  | 4    | 1          | 3     | 3     | 4  | 3      | 1     | 2    | 12    | 5        | 9      | 5      |
| 14q(II-1)   | 72          | small nucleolar RNA, C/D box 114-1              | 13  | 4    | 4          | 11    | 2     | 13 | 1      | 1     | 0    | 8     | 1        | 1      | 6      |
| HBII-95     | 85          | small nucleolar RNA, C/D box 11                 | 10  | 4    | 1          | 1     | 2     | 1  | 6      | 3     | 6    | 2     | 9        | 10     | 2      |
| HBII-99B    | 92          | small nucleolar RNA, C/D box 12B                | 9   | 4    | 2          | 1     | 1     | 9  | 6      | 4     | 6    | 5     | 2        | 5      | 2      |
| ACA10       | 133         | small nucleolar RNA, H/ACA box 10               | 15  | 4    | 2          | 3     | 1     | 1  | 1      | 2     | 3    | 2     | 1        | 11     | 15     |
| U94         | 137         | small nucleolar RNA, C/D box 94                 | 7   | 4    | 1          | 4     | 2     | 5  | 7      | 1     | 3    | 7     | 1        | 6      | 4      |
| ACA53       | 251         | small nucleolar RNA, H/ACA box 53               | 7   | 4    | 6          | 5     | 2     | 3  | 7      | 3     | 6    | 0     | 1        | 3      | 5      |
| Z17a        | 72          | small nucleolar RNA, C/D box 4A                 | 7   | 4    | 4          | 3     | 0     | 1  | 4      | 5     | 7    | 5     | 2        | 6      | 4      |
| U5E         | 51          | RNA, U5E small nuclear                          | 5   | 3    | 5          | 4     | 1     | 3  | 3      | 2     | 3    | 5     | 3        | 5      | 2      |
| U44         | 61          | small nucleolar RNA, C/D box 44                 | 8   | 3    | 8          | 3     | 1     | 2  | 4      | 1     | 5    | 4     | 1        | 6      | 1      |
| ACA32       | 122         | small nucleolar RNA, H/ACA box 32               | 10  | 3    | 10         | 2     | 1     | 4  | 1      | 3     | 3    | 1     | 2        | 1      | 8      |
| U66         | 133         | small nucleolar RNA, H/ACA box 66               | 13  | 3    | 4          | 13    | 0     | 1  | 4      | 0     | 4    | 0     | 1        | 3      | 6      |
| U40_U46     | 99          | small nucleolar RNA, C/D box 46                 | 5   | 3    | 2          | 2     | 1     | 5  | 5      | 5     | 5    | 4     | 2        | 4      | 1      |
| R38a        | 74          | small nucleolar RNA, C/D box 1A                 | 5   | 3    | 2          | 4     | 1     | 2  | 4      | 5     | 3    | 4     | 3        | 5      | 2      |
| 14q(II-14)  | 75          | small nucleolar RNA, C/D box 114-14             | 19  | 3    | 2          | 2     | 1     | 19 | 2      | 1     | 0    | 6     | 0        | 2      | 0      |
| 14q(II-12)  | 75          | small nucleolar RNA, C/D box 114-12             | 14  | 3    | 2          | 4     | 1     | 14 | 0      | 0     | 1    | 5     | 0        | 0      | 6      |
| 14q(0)      | 78          | small nucleolar RNA, C/D box 112                | 13  | 3    | 0          | 5     | 4     | 4  | 0      | 0     | 0    | 13    | 2        | 4      | 0      |
| Xist        | 28130       | X (inactive)-specific transcript (non-protein c | 11  | 3    | 0          | 7     | 2     | 0  | 5      | 0     | 3    | 11    | 4        | 0      | 0      |
| U64         | 129         | small nucleolar RNA, H/ACA box 64               | 5   | 3    | 4          | 1     | 3     | 4  | 1      | 1     | 2    | 4     | 5        | 2      | 4      |
| HBII-166    | 112         | small nucleolar RNA, C/D box 67                 | 6   | 3    | 4          | 0     | 0     | 6  | 4      | 1     | 2    | 4     | 3        | 3      | 2      |
| ACA35       | 166         | small Cajal body-specific RNA 1                 | 7   | 3    | 1          | 0     | 1     | 2  | 3      | 0     | 1    | 6     | 2        | 6      | 7      |
| ACA11       | 125         | small Cajal body-specific RNA 22                | 9   | 3    | 1          | 5     | 1     | 2  | 2      | 0     | 4    | 0     | 0        | 4      | 9      |
| mgh28S-2410 | 74          | small nucleolar RNA, C/D box 5                  | 11  | 3    | 1          | 0     | 2     | 0  | 2      | 2     | 4    | 3     | 1        | 11     | 1      |
| U16         | 102         | small nucleolar RNA, C/D box 16                 | 6   | 2    | 2          | 0     | 1     | 1  | 3      | 4     | 3    | 3     | 2        | 2      | 6      |
| ACA46       | 135         | small nucleolar RNA, H/ACA box 46               | 8   | 2    | 0          | 3     | 1     | 1  | 7      | 0     | 8    | 2     | 2        | 3      | 0      |
| HBII-429    | 77          | small nucleolar RNA, C/D box 100                | 7   | 2    | 1          | 4     | 1     | 0  | 1      | 1     | 3    | 7     | 1        | 6      | 2      |
| U101        | 73          | small nucleolar RNA, C/D box 101                | 7   | 2    | 6          | 0     | 1     | 1  | 1      | 1     | 7    | 2     | 2        | 3      | 1      |
| ACA49       | 137         | small nucleolar RNA, H/ACA box 49               | 4   | 2    | 1          | 3     | 2     | 1  | 1      | 0     | 3    | 4     | 3        | 2      | 4      |
| ACA38       | 132         | small nucleolar RNA, H/ACA box 38               | 15  | 2    | 1          | 0     | 2     | 1  | 1      | 0     | 3    | 0     | 1        | 0      | 15     |
| 14q(II-7)   | 77          | small nucleolar RNA, C/D box 114-7              | 7   | 2    | 0          | 0     | 2     | 4  | 0      | 0     | 1    | 7     | 1        | 4      | 3      |
| U68         | 130         | small nucleolar RNA, H/ACA box 68               | 4   | 2    | 0          | 0     | 2     | 1  | 1      | 1     | 4    | 4     | 4        | 4      | 1      |
| HBII-13     | 67          | small nucleolar RNA, C/D box 64                 | 12  | 2    | 1          | 0     | 2     | 12 | 2      | 0     | 0    | 3     | 2        | 0      | 0      |
| U106        | 79          | small nucleolar RNA, C/D box 12C                | 5   | 2    | 0          | 1     | 0     | 1  | 2      | 2     | 2    | 5     | 4        | 2      | 1      |
| ACA18       | 105         | small nucleolar RNA, H/ACA box 18               | 4   | 2    | 3          | 0     | 1     | 1  | 3      | 2     | 3    | 1     | 0        | 4      | 0      |
| U75         | 60          | small nucleolar RNA, C/D box 75                 | 5   | 2    | 2          | 0     | 0     | 1  | 0      | 3     | 0    | 1     | 3        | 5      | 4      |
| ACA14a      | 134         | small nucleolar RNA, H/ACA box 14A              | 5   | 2    | 2          | 0     | 0     | 2  | 1      | 5     | 3    | 1     | 0        | 0      | 2      |
| ACA43       | 134         | small nucleolar RNA, H/ACA box 43               | 3   | 2    | 2          | 3     | 1     | 2  | 2      | 2     | 2    | 1     | 2        | 1      | 1      |
| HBII-82B    | 88          | small nucleolar RNA, C/D box 111B               | 4   | 2    | 1          | 1     | 2     | 0  | 3      | 0     | 4    | 2     | 0        | 3      | 1      |
| U88         | 266         | small Cajal body-specific RNA 6                 | 4   | 1    | 1          | 0     | 1     | 3  | 1      | 1     | 4    | 1     | 2        | 1      | 1      |
| U83b        | 93          | small nucleolar RNA, C/D box 83B                | 5   | 1    | 0          | 1     | 2     | 0  | 1      | 0     | 5    | 2     | 1        | 4      | 1      |
| HBII-108B   | 85          | small nucleolar RNA, C/D box 19B                | 6   | 1    | 2          | 0     | 1     | 0  | 0      | 4     | 0    | 6     | 0        | 2      | 0      |
| U79         | 81          | small nucleolar RNA, C/D box 79                 | 3   | 1    | 2          | 0     | 0     | 2  | 3      | 1     | 2    | 3     | 2        | 0      | 1      |

| ncRNA       | transcript  |                                              | max | mean | hypothalam |       |       |    |        |       |      |       | skeletal |        |        |   |
|-------------|-------------|----------------------------------------------|-----|------|------------|-------|-------|----|--------|-------|------|-------|----------|--------|--------|---|
|             | length (nt) | type                                         |     |      | adipose    | colon | heart | us | kidney | liver | lung | ovary | muscle   | spleen | testes |   |
| U105B       | 80          | small nucleolar RNA, C/D box 105B            | 5   | 1    | 1          | 1     | 1     | 1  | 5      | 1     | 0    | 2     | 0        | 0      | 3      | 2 |
| U43         | 62          | small nucleolar RNA, C/D box 43              | 5   | 1    | 1          | 0     | 1     | 1  | 0      | 0     | 5    | 2     | 3        | 3      | 0      | 0 |
| ACA30       | 127         | small nucleolar RNA, H/ACA box 30            | 3   | 1    | 1          | 1     | 2     | 1  | 2      | 1     | 1    | 3     | 0        | 3      | 0      | 0 |
| ACA57       | 130         | small Cajal body-specific RNA 11             | 4   | 1    | 0          | 1     | 2     | 4  | 2      | 0     | 1    | 1     | 1        | 0      | 2      | 2 |
| USF         | 112         | RNA, USF small nuclear                       | 4   | 1    | 2          | 1     | 0     | 0  | 0      | 0     | 3    | 2     | 1        | 4      | 1      | 1 |
| ACA2a       | 134         | small nucleolar RNA, H/ACA box 2A            | 3   | 1    | 1          | 3     | 0     | 1  | 2      | 1     | 1    | 1     | 1        | 2      | 2      | 2 |
| U67         | 59          | small nucleolar RNA, H/ACA box 67            | 5   | 1    | 2          | 1     | 0     | 0  | 0      | 0     | 5    | 0     | 0        | 3      | 1      | 1 |
| U107        | 132         | small nucleolar RNA, H/ACA box 11            | 4   | 1    | 1          | 4     | 1     | 1  | 1      | 0     | 4    | 0     | 1        | 0      | 0      | 0 |
| ACA22       | 134         | small nucleolar RNA, H/ACA box 22            | 5   | 1    | 1          | 0     | 1     | 0  | 1      | 0     | 3    | 1     | 0        | 1      | 5      | 5 |
| U80         | 71          | small nucleolar RNA, C/D box 80              | 3   | 1    | 2          | 1     | 0     | 3  | 1      | 1     | 0    | 2     | 1        | 1      | 0      | 0 |
| ACA4        | 145         | small nucleolar RNA, H/ACA box 4             | 3   | 1    | 1          | 1     | 0     | 0  | 1      | 3     | 2    | 2     | 1        | 1      | 1      | 1 |
| ACA47       | 183         | small Cajal body-specific RNA 16             | 3   | 1    | 2          | 1     | 1     | 0  | 0      | 0     | 2    | 1     | 0        | 3      | 2      | 2 |
| SNORD125    | 97          | small nucleolar RNA, C/D box 125             | 3   | 1    | 1          | 0     | 2     | 3  | 1      | 1     | 0    | 0     | 3        | 0      | 1      | 1 |
| U63         | 68          | small nucleolar RNA, C/D box 63              | 4   | 1    | 1          | 0     | 0     | 1  | 2      | 2     | 0    | 1     | 0        | 4      | 1      | 1 |
| R38b        | 86          | small nucleolar RNA, C/D box 1B              | 3   | 1    | 0          | 0     | 0     | 3  | 1      | 2     | 0    | 2     | 1        | 3      | 0      | 0 |
| HBI-115     | 139         | small nucleolar RNA, H/ACA box 47            | 3   | 1    | 2          | 0     | 1     | 1  | 1      | 1     | 3    | 1     | 2        | 0      | 0      | 0 |
| ACA65       | 141         | small nucleolar RNA, H/ACA box 79            | 7   | 1    | 0          | 1     | 0     | 0  | 1      | 0     | 2    | 0     | 0        | 0      | 7      | 7 |
| 14q(l-5)    | 78          | small nucleolar RNA, C/D box 113-5           | 3   | 1    | 0          | 0     | 0     | 3  | 0      | 1     | 0    | 3     | 1        | 3      | 0      | 0 |
| SNORA84     | 134         | small nucleolar RNA, H/ACA box 84            | 4   | 1    | 0          | 2     | 0     | 0  | 0      | 1     | 4    | 1     | 0        | 1      | 1      | 1 |
| U7          | 62          | RNA, U7 small nuclear                        | 3   | 1    | 0          | 1     | 2     | 3  | 0      | 0     | 1    | 2     | 0        | 1      | 0      | 0 |
| U65         | 136         | small nucleolar RNA, H/ACA box 65            | 2   | 1    | 2          | 0     | 0     | 1  | 0      | 1     | 1    | 0     | 0        | 1      | 2      | 2 |
| U102        | 72          | small nucleolar RNA, C/D box 102             | 3   | 1    | 0          | 0     | 1     | 1  | 0      | 1     | 1    | 1     | 1        | 1      | 3      | 3 |
| U36b        | 71          | small nucleolar RNA, C/D box 36B             | 2   | 1    | 0          | 0     | 1     | 0  | 2      | 0     | 1    | 1     | 2        | 1      | 1      | 1 |
| mgh285-2412 | 71          | small nucleolar RNA, C/D box 6               | 3   | 1    | 0          | 3     | 0     | 1  | 2      | 0     | 3    | 1     | 0        | 0      | 0      | 0 |
| ACA15       | 135         | small nucleolar RNA, H/ACA box 15            | 3   | 1    | 0          | 1     | 0     | 0  | 0      | 0     | 2    | 1     | 1        | 3      | 0      | 0 |
| ACA33       | 133         | small nucleolar RNA, H/ACA box 33            | 1   | 1    | 1          | 1     | 1     | 1  | 1      | 0     | 1    | 1     | 0        | 1      | 1      | 1 |
| ACA41       | 132         | small nucleolar RNA, H/ACA box 41            | 2   | 1    | 0          | 2     | 0     | 1  | 1      | 2     | 0    | 1     | 0        | 1      | 2      | 2 |
| U18         | 70          | small nucleolar RNA, C/D box 18A             | 3   | 1    | 1          | 2     | 0     | 0  | 0      | 1     | 3    | 1     | 0        | 0      | 0      | 0 |
| U18C        | 68          | small nucleolar RNA, C/D box 18C             | 3   | 1    | 0          | 0     | 0     | 1  | 1      | 1     | 3    | 1     | 0        | 2      | 0      | 0 |
| 14q(lI-3)   | 75          | small nucleolar RNA, C/D box 114-3           | 3   | 1    | 0          | 3     | 0     | 3  | 0      | 0     | 0    | 1     | 0        | 0      | 0      | 0 |
| PWRN1       | 1436        | Prader-Willi region non-protein coding RNA : | 3   | 1    | 0          | 0     | 0     | 1  | 1      | 0     | 0    | 2     | 0        | 0      | 3      | 3 |
| U48         | 65          | small nucleolar RNA, C/D box 48              | 2   | 1    | 1          | 0     | 0     | 2  | 0      | 0     | 1    | 0     | 1        | 2      | 0      | 0 |
| U35B        | 89          | small nucleolar RNA, C/D box 35B             | 2   | 1    | 0          | 1     | 0     | 1  | 1      | 0     | 0    | 2     | 0        | 0      | 1      | 1 |
| U5B         | 88          | RNA, U5B small nuclear 1                     | 2   | 1    | 2          | 0     | 0     | 0  | 0      | 1     | 1    | 0     | 1        | 1      | 1      | 1 |
| ACA56       | 129         | small nucleolar RNA, H/ACA box 56            | 4   | 1    | 0          | 1     | 0     | 0  | 0      | 0     | 1    | 0     | 0        | 0      | 4      | 4 |
| ACA59       | 152         | small nucleolar RNA, H/ACA box 59B;small nu  | 1   | 1    | 0          | 0     | 0     | 1  | 1      | 0     | 1    | 0     | 1        | 0      | 1      | 1 |
| 14q(l-7)    | 77          | small nucleolar RNA, C/D box 113-7           | 3   | 1    | 0          | 0     | 0     | 3  | 1      | 0     | 0    | 1     | 0        | 0      | 0      | 0 |
| 14q(l-4)    | 75          | small nucleolar RNA, C/D box 113-4           | 3   | 1    | 0          | 0     | 0     | 3  | 0      | 0     | 0    | 2     | 0        | 0      | 0      | 0 |
| U72         | 132         | small nucleolar RNA, H/ACA box 72            | 1   | 1    | 0          | 0     | 0     | 1  | 0      | 1     | 0    | 1     | 0        | 1      | 0      | 0 |
| SNORA11     | 129         | small nucleolar RNA, H/ACA box 11            | 5   | 1    | 0          | 0     | 0     | 5  | 0      | 0     | 0    | 0     | 0        | 1      | 0      | 0 |
| U42B        | 68          | small nucleolar RNA, C/D box 42B             | 2   | 1    | 1          | 0     | 0     | 0  | 1      | 0     | 0    | 1     | 0        | 2      | 0      | 0 |
| IPW         | 4498        | imprinted in Prader-Willi syndrome (non-pro  | 1   | 1    | 0          | 0     | 1     | 1  | 1      | 0     | 0    | 1     | 1        | 0      | 1      | 1 |
| 14q(l-9)    | 72          | small nucleolar RNA, C/D box 113-9           | 2   | 1    | 0          | 0     | 0     | 2  | 2      | 0     | 0    | 2     | 0        | 0      | 0      | 0 |
| U37         | 66          | small nucleolar RNA, C/D box 37              | 3   | 0    | 0          | 3     | 0     | 0  | 1      | 1     | 0    | 0     | 0        | 0      | 1      | 1 |
| U69         | 132         | small nucleolar RNA, H/ACA box 69            | 3   | 0    | 1          | 0     | 0     | 0  | 0      | 0     | 0    | 1     | 0        | 0      | 3      | 3 |
| CDKN2BAS    | 3832        | CDKN2B antisense RNA (non-protein coding)    | 2   | 0    | 0          | 1     | 0     | 0  | 0      | 0     | 1    | 0     | 0        | 1      | 2      | 2 |
| SNORD123    | 71          | small nucleolar RNA, C/D box 123             | 2   | 0    | 0          | 1     | 0     | 1  | 0      | 0     | 0    | 2     | 0        | 0      | 0      | 0 |
| 14q(lI-28)  | 72          | small nucleolar RNA, C/D box 114-28          | 2   | 0    | 1          | 1     | 0     | 2  | 0      | 1     | 0    | 0     | 0        | 0      | 0      | 0 |
| HVG-1       | 101         | vault RNA 1-1                                | 2   | 0    | 0          | 0     | 1     | 0  | 0      | 0     | 0    | 0     | 0        | 2      | 1      | 1 |
| U73a        | 65          | small nucleolar RNA, C/D box 73A             | 1   | 0    | 1          | 0     | 0     | 0  | 1      | 0     | 0    | 1     | 1        | 0      | 0      | 0 |
| U31         | 66          | small nucleolar RNA, C/D box 31              | 3   | 0    | 1          | 1     | 0     | 0  | 0      | 0     | 3    | 0     | 0        | 0      | 0      | 0 |
| HBI-100     | 145         | small Cajal body-specific RNA 3              | 1   | 0    | 1          | 1     | 0     | 0  | 0      | 0     | 1    | 1     | 0        | 0      | 0      | 0 |
| USA         | 116         | RNA, USA small nuclear                       | 1   | 0    | 0          | 0     | 1     | 0  | 0      | 0     | 0    | 1     | 1        | 0      | 1      | 1 |
