# Supplementary material for: Digital Genome-Wide ncRNA Expression, Including SnoRNAs, across 11 Human Tissues Using PolyA-Neutral Amplification
Source: PubMed Central journal article supplement (PMC2909899; doi:10.1371/journal.pone.0011779), 2010-07-26
Supplement: pone.0011779.s011.pdf [file pone.0011779.s011.pdf]

| location                  | span (nt) | hypothalam |        |         |        |        |        |        |        |        |        |        | skeletal muscle | spleen | testes | Comments                                                                                                    |
|---------------------------|-----------|------------|--------|---------|--------|--------|--------|--------|--------|--------|--------|--------|-----------------|--------|--------|-------------------------------------------------------------------------------------------------------------|
|                           |           | max        | mean   | adipose | colon  | heart  | kidney | liver  | lung   | ovary  | us     |        |                 |        |        |                                                                                                             |
| chr11:84867425-84942100   | 74676     | 73,814     | 45,409 | 41,288  | 51,061 | 36,027 | 51,258 | 38,725 | 73,814 | 46,392 | 46,353 | 47,628 | 40,018          | 26,939 | 26,939 | Locus contains a 28S rRNA-like element, line elements, and high conservation in an intron of mRNA DLG2.     |
| chr11:65022925-65031750   | 8826      | 20,255     | 11,279 | 13,377  | 7,422  | 11,233 | 3,986  | 20,255 | 1,504  | 19,810 | 14,704 | 11,628 | 12,850          | 7,301  | 7,301  | Locus contains ncRNA MALAT1.                                                                                |
| chr2:202890425-20291400   | 23601     | 9,716      | 1,523  | 1,737   | 823    | 1,204  | 2,716  | 1,260  | 1,758  | 1,800  | 843    | 927    | 1,979           | 1,720  | 1,720  | Locus contains a SRP_rRNA-related                                                                           |
| chr21:14365075-14379300   | 14251     | 2,229      | 842    | 2,229   | 1,512  | 606    | 845    | 611    | 492    | 774    | 368    | 522    | 440             | 865    | 865    | Locus contains a 28S_rRNA-related                                                                           |
| chr11:64946775-64971250   | 24476     | 2,137      | 868    | 1,155   | 1,044  | 623    | 342    | 1,295  | 179    | 2,137  | 458    | 1,128  | 693             | 493    | 493    | Locus contains ncRNA NEAT1.                                                                                 |
| chr15:22809575-22919700   | 110126    | 1,816      | 557    | 114     | 186    | 430    | 1,816  | 1,006  | 114    | 287    | 783    | 516    | 357             | 520    | 520    | PWS locus, including snoRNA clusters HBB1-85 and HBB1-52, U2W (ncRNA), and more                             |
| chr12:9061725-90111600    | 240376    | 1,446      | 566    | 464     | 334    | 1,446  | 587    | 221    | 283    | 199    | 363    | 454    | 217             | 386    | 386    | Locus contains mRNA PDZRN4 but reads are elsewhere                                                          |
| chr6:67993975-68000500    | 7076      | 1,390      | 631    | 229     | 405    | 290    | 257    | 367    | 253    | 1,049  | 822    | 1,029  | 1,330           | 939    | 939    | Locus contains ncRNA SHNG6, snoRNA HBB1-276, and mRNA C6orf45. Reads are from HBB1-276.                     |
| chr11:13827100-114091750  | 246451    | 1,197      | 490    | 436     | 356    | 452    | 369    | 223    | 523    | 342    | 1,197  | 556    | 609             | 330    | 330    | Locus contains H3_Y_RNA-related, SRP_RNA-related, and miRNA.                                                |
| chr7:130178825-130451400  | 272576    | 1,188      | 418    | 202     | 213    | 217    | 105    | 299    | 152    | 668    | 1,188  | 482    | 742             | 330    | 330    | Locus contains ncRNA FLJ13663 (NR_015431.1)                                                                 |
| chr12:126216200-126231125 | 14926     | 792        | 391    | 792     | 541    | 274    | 638    | 388    | 565    | 275    | 191    | 230    | 205             | 207    | 207    | Locus contains a 28S rRNA-like gene.                                                                        |
| chr8:125239925-125298400  | 58476     | 726        | 95     | 4       | 105    | 9      | 5      | 12     | 726    | 32     | 10     | 12     | 109             | 15     | 15     | Locus contains ESTs                                                                                         |
| chr8:7336425-73429775     | 93351     | 618        | 253    | 231     | 239    | 164    | 84     | 325    | 68     | 310    | 618    | 127    | 406             | 208    | 208    | Locus contains miRNA NCRNA00182, miRNAs, and ESTs.                                                          |
| chr6:21774653-22329825    | 555173    | 597        | 154    | 80      | 123    | 79     | 132    | 118    | 86     | 141    | 597    | 65     | 124             | 150    | 150    | Locus contains no known genes but many ESTs and mRNAs.                                                      |
| chr2:106659950-106724850  | 64901     | 586        | 261    | 170     | 117    | 207    | 94     | 341    | 129    | 393    | 586    | 83     | 459             | 295    | 295    | Locus contains ESTs                                                                                         |
| chr2:209099000-209402250  | 303251    | 567        | 83     | 22      | 42     | 22     | 19     | 567    | 13     | 41     | 65     | 19     | 49              | 53     | 53     |                                                                                                             |
| chr4:88997950-889808100   | 90151     | 550        | 249    | 165     | 84     | 355    | 550    | 148    | 138    | 144    | 477    | 293    | 207             | 180    | 180    |                                                                                                             |
| chr2:186421575-187045450  | 623876    | 543        | 192    | 104     | 165    | 97     | 91     | 272    | 47     | 162    | 543    | 120    | 246             | 270    | 270    | Interesting -- locus contains no genes but high conservation and general transcription.                     |
| chrX:72949400-72989313    | 39914     | 480        | 127    | 1       | 235    | 74     | 1      | 241    | 0      | 156    | 480    | 208    | 1               | 7      | 7      | Locus contains ncRNA XIST.                                                                                  |
| chr3:62910725-63091200    | 180476    | 464        | 96     | 7       | 464    | 87     | 5      | 121    | 209    | 94     | 24     | 3      | 21              | 25     | 25     |                                                                                                             |
| chr3:32905675-33033300    | 127626    | 456        | 79     | 16      | 15     | 38     | 19     | 456    | 7      | 20     | 13     | 236    | 19              | 26     | 26     |                                                                                                             |
| chrX:93434300-94126850    | 692551    | 455        | 107    | 33      | 39     | 35     | 25     | 279    | 25     | 455    | 86     | 28     | 60              | 99     | 99     |                                                                                                             |
| chr6:7218125-72186342     | 58218     | 392        | 63     | 21      | 11     | 34     | 18     | 392    | 11     | 92     | 26     | 29     | 34              | 30     | 30     | Locus contains ncRNA C6orf155 and miRNAs                                                                    |
| chr20:34091925-34103650   | 11726     | 386        | 190    | 141     | 88     | 229    | 386    | 172    | 79     | 202    | 274    | 191    | 168             | 162    | 162    | Locus contains ESTs and ncRNA LOC649799 (NR_027451).                                                        |
| chr1:220524025-220686875  | 162851    | 376        | 174    | 376     | 200    | 162    | 97     | 181    | 41     | 315    | 55     | 68     | 51              | 367    | 367    |                                                                                                             |
| chr5:148767275-148793000  | 25276     | 368        | 81     | 40      | 368    | 52     | 6      | 27     | 4      | 34     | 193    | 13     | 79              | 70     | 70     | Locus contains ncRNA LOC728264 and miRNAs.                                                                  |
| chr14:100364750-100405275 | 40526     | 367        | 69     | 11      | 27     | 18     | 170    | 17     | 4      | 13     | 367    | 8      | 49              | 76     | 76     | Locus contains ncRNA MEGS.                                                                                  |
| chr1:110643475-110767925  | 124451    | 358        | 196    | 147     | 107    | 198    | 121    | 157    | 107    | 195    | 358    | 332    | 230             | 200    | 200    |                                                                                                             |
| chr8:134423875-134497625  | 73751     | 358        | 137    | 137     | 57     | 95     | 131    | 140    | 110    | 84     | 358    | 151    | 92              | 156    | 156    |                                                                                                             |
| chr19:20755700-20823525   | 67826     | 354        | 73     | 29      | 40     | 27     | 45     | 58     | 11     | 46     | 354    | 22     | 94              | 77     | 77     |                                                                                                             |
| chr7:173497625-173771725  | 274101    | 338        | 155    | 86      | 134    | 124    | 99     | 123    | 78     | 276    | 210    | 78     | 338             | 162    | 162    |                                                                                                             |
| chr10:19970175-20140000   | 169826    | 336        | 78     | 24      | 105    | 43     | 34     | 61     | 336    | 27     | 149    | 23     | 21              | 33     | 33     |                                                                                                             |
| chr6:6412600-64618150     | 492051    | 334        | 144    | 74      | 197    | 80     | 87     | 188    | 41     | 136    | 334    | 58     | 226             | 163    | 163    |                                                                                                             |
| chr8:7766425-78134625     | 468201    | 300        | 89     | 44      | 58     | 63     | 25     | 146    | 19     | 62     | 300    | 22     | 109             | 138    | 138    | Locus contains genes or ESTs                                                                                |
| chr6:67977175-68014325    | 37151     | 294        | 113    | 140     | 42     | 54     | 294    | 85     | 204    | 89     | 90     | 62     | 105             | 73     | 73     |                                                                                                             |
| chr6:106965550-107033200  | 67651     | 290        | 146    | 79      | 62     | 217    | 290    | 122    | 118    | 175    | 146    | 123    | 191             | 83     | 83     |                                                                                                             |
| chr4:12676250-12957000    | 280751    | 290        | 128    | 89      | 97     | 132    | 290    | 118    | 75     | 83     | 185    | 77     | 134             | 130    | 130    | Locus contains ncRNA HSP90AB2P                                                                              |
| chr4:70858200-71037050    | 178851    | 284        | 91     | 45      | 88     | 48     | 37     | 97     | 33     | 187    | 67     | 11     | 284             | 100    | 100    | Locus contains ESTs                                                                                         |
| chr5:6066575-60714725     | 48951     | 277        | 78     | 33      | 66     | 47     | 32     | 78     | 36     | 102    | 277    | 18     | 118             | 55     | 55     | Locus contains ESTs                                                                                         |
| chr4:100459225-100696000  | 150376    | 275        | 82     | 24      | 23     | 34     | 242    | 24     | 18     | 26     | 275    | 20     | 92              | 121    | 121    | Locus contains snoRNA cluster 14q                                                                           |
| chr3:175644725-176014550  | 368926    | 264        | 37     | 73      | 50     | 45     | 12     | 11     | 55     | 264    | 44     | 66     | 74              | 74     | 74     | Locus contains ESTs and miRNAs                                                                              |
| chr17:67895375-68089875   | 203301    | 264        | 35     | 5       | 264    | 5      | 21     | 12     | 4      | 31     | 10     | 3      | 8               | 20     | 20     |                                                                                                             |
| chr8:17399650-17430625    | 30976     | 231        | 36     | 4       | 5      | 9      | 5      | 13     | 74     | 9      | 231    | 29     | 7               | 13     | 13     | Locus contains ESTs                                                                                         |
| chr5:88250875-88580200    | 32926     | 214        | 54     | 20      | 34     | 21     | 26     | 31     | 8      | 44     | 214    | 84     | 64              | 48     | 48     |                                                                                                             |
| chrX:114863475-114997900  | 134426    | 200        | 78     | 20      | 118    | 69     | 48     | 169    | 16     | 59     | 200    | 12     | 44              | 102    | 102    |                                                                                                             |
| chr5:33032900-33037175    | 274276    | 197        | 83     | 56      | 73     | 76     | 40     | 52     | 62     | 78     | 197    | 62     | 128             | 84     | 84     |                                                                                                             |
| chr10:6228325-6278100     | 49776     | 194        | 82     | 71      | 67     | 47     | 194    | 59     | 71     | 63     | 85     | 75     | 122             | 48     | 48     |                                                                                                             |
| chr2:134595725-134694600  | 98876     | 190        | 56     | 30      | 91     | 43     | 18     | 51     | 9      | 69     | 64     | 9      | 190             | 37     | 37     |                                                                                                             |
| chr22:25386775-25639800   | 253026    | 183        | 100    | 71      | 146    | 63     | 99     | 90     | 58     | 97     | 134    | 55     | 183             | 105    | 105    |                                                                                                             |
| chrX:55952950-56258125    | 305176    | 174        | 86     | 61      | 92     | 48     | 35     | 120    | 89     | 174    | 37     | 136    | 119             | 66     | 66     |                                                                                                             |
| chr1:172098475-172103825  | 5351      | 174        | 101    | 104     | 106    | 39     | 89     | 80     | 96     | 149    | 174    | 53     | 153             | 116    | 116    | Locus contains ncRNA GASS snoRNA RNA C/D box cluster, including U44, U47, U74-81. U76 is highest expressed. |
| chr8:58277700-58297325    | 19626     | 172        | 27     | 1       | 0      | 0      | 1      | 118    | 0      | 0      | 0      | 0      | 0               | 172    | 172    |                                                                                                             |
| chrX:73081400-73149600    | 68201     | 172        | 60     | 33      | 41     | 40     | 29     | 80     | 20     | 59     | 172    | 54     | 77              | 59     | 59     |                                                                                                             |
| chr7:18241000-18493675    | 252676    | 168        | 37     | 32      | 23     | 27     | 20     | 16     | 7      | 31     | 28     | 8      | 168             | 49     | 49     |                                                                                                             |
| chr20:36470500-36515575   | 45076     | 161        | 73     | 59      | 149    | 25     | 51     | 48     | 60     | 93     | 51     | 21     | 83              | 161    | 161    | Looks great!! Contains ncRNA ACA60, U71a, and U71b                                                          |
| chrX:135771475-135783050  | 11576     | 160        | 73     | 29      | 35     | 68     | 24     | 70     | 19     | 68     | 108    | 79     | 160             | 141    | 141    |                                                                                                             |
| chr2:127007450-127034900  | 27451     | 159        | 60     | 62      | 32     | 52     | 159    | 49     | 22     | 66     | 45     | 20     | 96              | 56     | 56     |                                                                                                             |
| chr10:67000950-67213100   | 212151    | 158        | 40     | 10      | 24     | 13     | 10     | 74     | 17     | 23     | 158    | 7      | 75              | 67     | 67     |                                                                                                             |
| chr5:144793925-145104175  | 310251    | 156        | 61     | 29      | 156    | 70     | 18     | 38     | 9      | 64     | 145    | 21     | 55              | 63     | 63     |                                                                                                             |
| chr1:141730725-141862525  | 131801    | 156        | 80     | 59      | 47     | 68     | 28     | 57     | 17     | 88     | 156    | 58     | 153             | 143    | 143    |                                                                                                             |
| chrX:148863050-149024650  | 161601    | 156        | 57     | 29      | 69     | 22     | 24     | 93     | 7      | 57     | 156    | 30     | 52              | 89     | 89     |                                                                                                             |
| chr11:86297350-86316725   | 19376     | 151        | 36     | 151     | 9      | 23     | 12     | 31     | 1      | 30     | 79     | 19     | 15              | 24     | 24     | Locus contains ESTs                                                                                         |
| chr9:2442800-2542025      | 99226     | 150        | 23     | 31      | 7      | 14     | 7      | 11     | 4      | 10     | 150    | 4      | 7               | 7      | 7      |                                                                                                             |
| chr6:119718475-120097975  | 379501    | 144        | 52     | 54      | 35     | 30     | 22     | 85     | 8      | 44     | 83     | 18     | 144             | 53     | 53     |                                                                                                             |
| chr8:97432775-97543875    | 111101    | 142        | 84     | 141     | 80     | 47     | 62     | 74     | 87     | 87     | 142    | 24     | 104             | 72     | 72     |                                                                                                             |
| chr3:115526175-115535575  | 9401      | 141        | 54     | 41      | 10     | 64     | 30     | 78     | 36     | 35     | 141    | 51     | 48              | 62     | 62     | Locus contains ESTs, conserved blocks, and a possible 3' UTR extension of a nearby mRNAs                    |
| chr10:46514400-46569425   | 55026     | 141        | 57     | 53      | 43     | 45     | 78     | 31     | 59     | 44     | 141    | 32     | 60              | 38     | 38     |                                                                                                             |
| chr8:130300925-130810225  | 509301    | 139        | 35     | 18      | 40     | 14     | 13     | 31     | 17     | 33     | 37     | 13     | 139             | 29     | 29     |                                                                                                             |
| chr11:39456550-40064650   | 608101    | 137        | 61     | 31      | 64     | 33     | 28     | 62     | 18     | 61     | 137    |        |                 |        |        |                                                                                                             |

| location                  | span (nt) | hypothalam |      |         |       |       |    |        |       |      |       |    | skeletal muscle | spleen | testes | Comments                         |
|---------------------------|-----------|------------|------|---------|-------|-------|----|--------|-------|------|-------|----|-----------------|--------|--------|----------------------------------|
|                           |           | max        | mean | adipose | colon | heart | us | kidney | liver | lung | ovary |    |                 |        |        |                                  |
| chr1:17410975-174170025   | 60301     | 86         | 54   | 58      | 86    | 38    |    | 46     | 25    | 82   | 47    | 73 | 38              | 78     | 24     |                                  |
| chr6:42833450-42867750    | 34301     | 86         | 34   | 18      | 46    | 17    |    | 13     | 34    | 4    | 27    | 86 | 32              | 69     | 29     |                                  |
| chr13:81905500-83297700   | 1392201   | 86         | 56   | 34      | 76    | 34    |    | 56     | 70    | 20   | 61    | 86 | 28              | 75     | 76     |                                  |
| chr3:13011600-13315275    | 303676    | 86         | 46   | 61      | 59    | 27    |    | 65     | 22    | 33   | 55    | 20 | 23              | 86     | 51     |                                  |
| chrX:149113300-149357500  | 244201    | 85         | 42   | 34      | 30    | 29    |    | 31     | 39    | 26   | 59    | 85 | 24              | 35     | 69     |                                  |
| chr13:99372500-99383275   | 10926     | 82         | 35   | 82      | 63    | 8     |    | 68     | 13    | 49   | 24    | 8  | 11              | 25     | 35     |                                  |
| chr1:197068975-197174200  | 105226    | 81         | 21   | 10      | 5     | 12    | 14 | 16     | 5     | 56   | 12    | 2  | 2               | 81     | 15     |                                  |
| chr3:196904200-196928625  | 24426     | 80         | 41   | 16      | 74    | 23    |    | 31     | 80    | 9    | 29    | 71 | 34              | 34     | 44     |                                  |
| chr10:42319800-42366925   | 47126     | 80         | 36   | 23      | 20    | 25    |    | 46     | 36    | 7    | 34    | 75 | 13              | 80     | 34     |                                  |
| chr7:135390850-135602275  | 271426    | 79         | 29   | 17      | 27    | 14    |    | 12     | 19    | 7    | 37    | 28 | 10              | 79     | 68     |                                  |
| chr7:10440300-10440275    | 36976     | 79         | 33   | 15      | 41    | 18    |    | 43     | 7     | 24   | 69    | 15 | 19              | 79     | 29     |                                  |
| chr17:173389725-173428400 | 39126     | 79         | 25   | 35      | 12    | 23    |    | 12     | 26    | 18   | 43    | 12 | 6               | 79     | 10     |                                  |
| chr5:131713500-131731950  | 18451     | 78         | 31   | 18      | 41    | 19    |    | 11     | 78    | 6    | 15    | 39 | 60              | 16     | 31     |                                  |
| chr19:32905775-33020475   | 114701    | 78         | 44   | 31      | 35    | 32    |    | 37     | 56    | 19   | 32    | 75 | 15              | 78     | 72     |                                  |
| chrX:139623150-139637100  | 13951     | 78         | 10   | 3       | 10    | 4     |    | 78     | 1     | 0    | 2     | 2  | 3               | 6      | 4      | Locus contains ncRNA RP1-177G6.2 |
| chr8:129045250-129106528  | 61279     | 77         | 20   | 6       | 24    | 8     |    | 3      | 5     | 2    | 16    | 77 | 12              | 39     | 29     |                                  |
| chr6:30364275-30401550    | 37276     | 77         | 34   | 21      | 35    | 25    |    | 22     | 49    | 13   | 28    | 77 | 13              | 58     | 30     |                                  |
| chr4:3542725-3692050      | 149326    | 76         | 10   | 2       | 7     | 2     |    | 2      | 76    | 3    | 4     | 4  | 1               | 3      | 5      |                                  |
| chr2:217838575-218189250  | 350676    | 76         | 35   | 44      | 34    | 45    |    | 16     | 30    | 5    | 34    | 54 | 13              | 76     | 37     |                                  |
| chr13:39764925-39866925   | 102001    | 74         | 29   | 60      | 17    | 14    |    | 9      | 17    | 74   | 43    | 27 | 20              | 16     | 20     |                                  |
| chr5:127320775-127407525  | 86751     | 73         | 36   | 24      | 24    | 29    |    | 29     | 42    | 12   | 25    | 69 | 25              | 73     | 38     |                                  |
| chr8:90781700-90817050    | 35351     | 72         | 26   | 17      | 20    | 21    |    | 16     | 38    | 5    | 26    | 72 | 7               | 40     | 31     |                                  |
| chr16:10338750-10419300   | 80551     | 72         | 21   | 8       | 15    | 12    |    | 8      | 16    | 10   | 27    | 23 | 3               | 33     | 72     |                                  |
| chr13:66853600-67679750   | 826151    | 71         | 38   | 27      | 38    | 26    |    | 24     | 43    | 15   | 44    | 71 | 22              | 49     | 55     |                                  |
| chr11:27551550-27606750   | 55201     | 71         | 32   | 23      | 15    | 33    |    | 22     | 28    | 26   | 26    | 71 | 42              | 43     | 26     |                                  |
| chr1:191490425-191504575  | 14151     | 70         | 31   | 25      | 9     | 26    |    | 36     | 35    | 6    | 30    | 70 | 29              | 41     | 33     |                                  |
| chr5:141048275-141198325  | 150051    | 69         | 20   | 18      | 30    | 17    |    | 23     | 25    | 2    | 69    | 10 | 12              | 5      | 12     |                                  |
| chr3:64827825-64839350    | 11526     | 69         | 10   | 3       | 3     | 3     |    | 2      | 11    | 0    | 11    | 69 | 3               | 3      | 7      |                                  |
| chr8:52950675-53051275    | 100601    | 68         | 30   | 16      | 21    | 20    |    | 10     | 33    | 7    | 34    | 57 | 33              | 68     | 31     |                                  |
| chr5:67121850-67148800    | 26951     | 68         | 8    | 0       | 1     | 1     |    | 0      | 2     | 68   | 6     | 2  | 2               | 1      | 7      |                                  |
| chr1:237661375-237853250  | 191876    | 67         | 17   | 5       | 26    | 6     |    | 11     | 18    | 6    | 19    | 67 | 5               | 13     | 17     |                                  |
| chr7:78921550-78942375    | 20826     | 66         | 38   | 50      | 9     | 36    |    | 41     | 66    | 16   | 27    | 65 | 15              | 51     | 41     |                                  |
| chrX:53141125-53204125    | 63001     | 66         | 33   | 24      | 29    | 23    |    | 23     | 41    | 9    | 31    | 66 | 33              | 43     | 37     |                                  |
| chr8:114557150-115165825  | 608676    | 66         | 36   | 21      | 42    | 24    |    | 21     | 41    | 15   | 48    | 66 | 20              | 56     | 43     |                                  |
| chr1:83879475-84089425    | 209951    | 66         | 22   | 4       | 17    | 10    |    | 10     | 66    | 17   | 14    | 26 | 6               | 37     | 37     |                                  |
| chr6:61960000-6228150     | 268151    | 65         | 33   | 22      | 51    | 29    |    | 25     | 26    | 15   | 30    | 35 | 18              | 65     | 50     |                                  |
| chr7:55494425-55505775    | 11351     | 65         | 20   | 22      | 16    | 18    |    | 16     | 23    | 11   | 16    | 17 | 10              | 65     | 11     |                                  |
| chr7:22570350-22697250    | 126901    | 65         | 15   | 7       | 12    | 12    |    | 6      | 6     | 6    | 25    | 6  | 9               | 65     | 16     |                                  |
| chr5:27086125-27661000    | 574876    | 65         | 31   | 17      | 30    | 23    |    | 18     | 65    | 13   | 55    | 37 | 11              | 36     | 39     |                                  |
| chr3:8312700-8451425      | 138726    | 64         | 22   | 21      | 17    | 11    |    | 21     | 34    | 4    | 16    | 64 | 11              | 19     | 26     |                                  |
| chrX:71049200-71256150    | 206951    | 64         | 40   | 33      | 59    | 36    |    | 34     | 27    | 32   | 64    | 59 | 22              | 46     | 33     |                                  |
| chr11:21514300-121586150  | 71851     | 63         | 16   | 6       | 7     | 15    |    | 12     | 25    | 4    | 16    | 63 | 3               | 3      | 17     |                                  |
| chr12:7854175-177922425   | 68251     | 63         | 14   | 11      | 8     | 7     |    | 11     | 63    | 2    | 8     | 12 | 5               | 12     | 13     |                                  |
| chr3:3063875-4110125      | 623851    | 63         | 38   | 25      | 37    | 29    |    | 27     | 48    | 19   | 33    | 54 | 33              | 55     | 63     |                                  |
| chr16:71041100-7132025    | 27926     | 62         | 32   | 17      | 43    | 18    |    | 17     | 43    | 14   | 28    | 54 | 15              | 45     | 62     |                                  |
| chr6:155200400-155254075  | 57676     | 62         | 30   | 13      | 29    | 23    |    | 13     | 31    | 8    | 29    | 62 | 33              | 59     | 27     |                                  |
| chr6:11226350-11254175    | 27826     | 62         | 16   | 7       | 8     | 14    |    | 62     | 9     | 15   | 9     | 14 | 10              | 14     | 11     |                                  |
| chr10:92917275-92951850   | 34576     | 61         | 21   | 7       | 9     | 19    |    | 13     | 24    | 9    | 22    | 61 | 14              | 44     | 12     |                                  |
| chr11:128587275-128651150 | 63876     | 60         | 24   | 11      | 25    | 13    |    | 11     | 37    | 10   | 26    | 60 | 6               | 22     | 46     |                                  |
| chr8:12911400-129188100   | 76701     | 60         | 15   | 4       | 14    | 6     |    | 3      | 4     | 2    | 9     | 60 | 11              | 34     | 22     |                                  |
| chr13:44814075-44848225   | 34151     | 60         | 24   | 15      | 39    | 12    |    | 12     | 35    | 4    | 26    | 60 | 14              | 20     | 26     |                                  |
| chr2:75354900-75436900    | 82001     | 59         | 11   | 3       | 6     | 3     |    | 3      | 14    | 2    | 10    | 12 | 3               | 59     | 7      |                                  |
| chr6:159938625-15994650   | 56026     | 59         | 15   | 6       | 9     | 11    |    | 4      | 13    | 2    | 26    | 9  | 59              | 17     | 8      |                                  |
| chr14:100425525-100457175 | 31651     | 58         | 13   | 3       | 7     | 6     |    | 11     | 3     | 4    | 4     | 58 | 2               | 24     | 19     |                                  |
| chr3:119466150-119800500  | 334351    | 58         | 32   | 18      | 39    | 21    |    | 24     | 33    | 13   | 41    | 58 | 19              | 47     | 43     |                                  |
| chrX:57186025-57301200    | 115176    | 57         | 31   | 19      | 37    | 18    |    | 17     | 39    | 8    | 28    | 57 | 19              | 53     | 44     |                                  |
| chrX:97651200-98066850    | 415651    | 56         | 30   | 15      | 37    | 18    |    | 16     | 38    | 7    | 31    | 56 | 18              | 42     | 47     |                                  |
| chr6:138942775-139061900  | 119126    | 56         | 19   | 15      | 29    | 13    |    | 10     | 27    | 11   | 25    | 12 | 3               | 56     | 11     |                                  |
| chr12:104249300-104514975 | 265676    | 56         | 25   | 11      | 32    | 12    |    | 10     | 41    | 7    | 29    | 35 | 13              | 33     | 56     |                                  |
| chr4:80197750-80386675    | 189426    | 56         | 26   | 13      | 18    | 22    |    | 30     | 24    | 4    | 26    | 51 | 25              | 19     | 56     |                                  |
| chrX:117025575-117121675  | 96101     | 56         | 24   | 14      | 27    | 16    |    | 9      | 54    | 4    | 21    | 56 | 14              | 23     | 29     |                                  |
| chr4:15848225-15898675    | 50451     | 55         | 23   | 13      | 20    | 9     |    | 18     | 55    | 3    | 10    | 55 | 6               | 33     | 28     |                                  |
| chr3:157935925-158021825  | 85901     | 55         | 31   | 21      | 25    | 28    |    | 20     | 45    | 38   | 24    | 37 | 22              | 55     | 25     |                                  |
| chr22:24179500-24251325   | 71826     | 55         | 21   | 13      | 18    | 14    |    | 8      | 22    | 3    | 23    | 55 | 14              | 24     | 36     |                                  |
| chr16:85065635-85099967   | 34333     | 54         | 11   | 0       | 54    | 0     |    | 2      | 1     | 3    | 54    | 1  | 0               | 2      | 2      |                                  |
| chr13:32786375-32821550   | 35176     | 54         | 22   | 33      | 19    | 24    |    | 7      | 23    | 9    | 26    | 54 | 6               | 23     | 20     |                                  |
| chr3:200278025-200421800  | 143776    | 54         | 27   | 26      | 16    | 13    |    | 40     | 41    | 11   | 14    | 25 | 54              | 36     | 25     |                                  |
| chr3:156439750-156538375  | 98626     | 54         | 14   | 6       | 11    | 6     |    | 4      | 16    | 3    | 9     | 17 | 54              | 11     | 14     |                                  |
| chr14:57814000-57830600   | 16601     | 54         | 33   | 35      | 31    | 28    |    | 30     | 39    | 24   | 38    | 38 | 18              | 54     | 34     |                                  |
| chr5:60766375-60837150    | 70776     | 54         | 24   | 15      | 23    | 15    |    | 13     | 22    | 10   | 54    | 35 | 7               | 43     | 23     |                                  |
| chr6:139850800-140190150  | 339351    | 54         | 21   | 14      | 27    | 10    |    | 8      | 20    | 16   | 54    | 19 | 6               | 25     | 28     |                                  |
| chr15:92584350-92637350   | 53001     | 54         | 12   | 2       | 21    | 6     |    | 1      | 7     | 5    | 28    | 4  | 1               | 54     | 6      |                                  |
| chr7:65641550-65680075    | 38526     | 53         | 26   | 27      | 22    | 17    |    | 30     | 24    | 12   | 22    | 53 | 12              | 28     | 34     |                                  |
| chr14:65797475-66001975   | 204501    | 53         | 28   | 17      | 24    | 12    |    | 9      | 53    | 18   | 19    | 49 | 20              | 39     | 53     |                                  |
| chr8:38735375-38749400    | 14026     | 53         | 27   | 37      | 53    | 19    |    | 10     | 32    | 7    | 29    | 44 | 8               | 33     | 28     |                                  |
| chrX:56439250-56581650    | 142401    | 53         | 30   | 18      | 33    | 19    |    | 15     | 43    | 8    | 33    | 53 | 23              | 42     | 42     |                                  |
| chr11:11896075-111816900  | 10826     | 53         | 16   | 13      | 4     | 53    |    | 21     | 11    | 4    | 7     | 16 | 35              | 9      | 9      |                                  |
| chr6:40724100-41038875    | 312776    | 52         | 38   | 8       | 17    | 15    |    | 10     | 16    | 4    | 15    | 52 | 15              | 18     | 23     |                                  |
| chr7:70066250-70116975    | 50726     | 52         | 22   | 15      | 20    | 10    |    | 15     | 28    | 5    | 18    | 52 | 22              | 26     | 32     |                                  |
| chrX:78326100-78453100    | 127001    | 52         | 15   | 7       | 16    | 9     |    | 5      | 15    | 3    | 20    | 18 | 5               | 52     | 14     |                                  |
| chr1:202791825-202842475  | 50651     | 52         | 17   | 10      | 13    | 9     |    | 10     | 17    | 5    | 23    | 14 | 16              | 52     | 13     |                                  |
| chr10:64906075-64942725   | 36651     | 52         | 20   | 14      | 16    | 14    |    | 9      | 26    | 5    | 20    | 52 | 6               | 36     | 27     |                                  |
| chr1:98211850-98471750    | 259901    | 52         | 16   | 4       | 14    | 5     |    | 52     | 8     | 19   | 9     | 28 | 6               | 10     | 20     |                                  |
| chr11:82461075-82481150   | 20076     | 52         | 21   | 12      | 14    | 16    |    | 11     | 29    | 4    | 12    | 52 | 20              | 40     | 19     |                                  |
| chr20:3798525-3805650     | 7126      | 51         | 33   | 27      | 39    | 45    |    | 15     | 38    | 15   | 20    | 44 | 51              | 44     | 22     |                                  |
| chr1:42162000-42267700    | 105701    | 51         | 25   | 23      | 17    | 16    |    | 12     | 28    | 7    | 43    | 42 | 13              | 51     | 24     |                                  |
| chr2:195896350-196221150  | 324801    | 51         | 20   | 11      | 28    | 11    |    | 9      | 19    | 6    | 18    | 29 | 11              | 29     | 51     |                                  |
| chr12:31876125-31998175   | 122051    | 51         | 16   | 16      | 20    | 8     |    | 9      | 10    | 16   | 12    | 12 | 9               | 51     | 11     |                                  |
| chr8:1                    |           |            |      |         |       |       |    |        |       |      |       |    |                 |        |        |                                  |

| location                  | span (nt) | hypothalam |      |         |       |       |    |        |       |      |       |    | skeletal muscle | spleen | testes | Comments |  |
|---------------------------|-----------|------------|------|---------|-------|-------|----|--------|-------|------|-------|----|-----------------|--------|--------|----------|--|
|                           |           | max        | mean | adipose | colon | heart | us | kidney | liver | lung | ovary | 11 |                 |        |        |          |  |
| chr2:46715775-6757875     | 42101     | 45         | 15   | 8       | 15    | 7     | 7  | 14     | 2     | 17   | 45    | 11 | 20              | 17     |        |          |  |
| chr15:19352325-19432225   | 79901     | 44         | 11   | 4       | 6     | 7     | 5  | 7      | 2     | 7    | 23    | 5  | 9               | 44     |        |          |  |
| chr19:56887550-56898800   | 11251     | 44         | 17   | 11      | 19    | 16    | 11 | 24     | 1     | 19   | 44    | 4  | 17              | 24     |        |          |  |
| chr13:83992850-84271550   | 278701    | 44         | 26   | 22      | 21    | 36    | 28 | 30     | 14    | 26   | 24    | 14 | 44              | 26     |        |          |  |
| chr10:131738400-131809350 | 70951     | 44         | 23   | 12      | 20    | 13    | 15 | 44     | 43    | 15   | 23    | 12 | 30              | 25     |        |          |  |
| chr12:9168650-9183575     | 14926     | 43         | 13   | 8       | 4     | 7     | 3  | 6      | 24    | 23   | 10    | 6  | 43              | 7      |        |          |  |
| chr6:80305150-80328275    | 23126     | 43         | 15   | 6       | 4     | 7     | 10 | 22     | 1     | 12   | 43    | 14 | 12              | 32     |        |          |  |
| chr8:102254625-102268925  | 14301     | 43         | 13   | 4       | 10    | 7     | 43 | 8      | 2     | 13   | 13    | 22 | 18              | 6      |        |          |  |
| chr5:87601475-87624775    | 23301     | 43         | 21   | 8       | 12    | 17    | 18 | 34     | 5     | 16   | 43    | 16 | 35              | 26     |        |          |  |
| chr12:56063700-56107050   | 45351     | 43         | 27   | 15      | 42    | 20    | 10 | 33     | 9     | 23   | 43    | 22 | 42              | 40     |        |          |  |
| chr15:324225-33301050     | 88726     | 43         | 16   | 8       | 7     | 7     | 6  | 25     | 6     | 18   | 43    | 13 | 14              | 25     |        |          |  |
| chr1:143894500-143965675  | 71176     | 42         | 16   | 11      | 41    | 12    | 5  | 19     | 5     | 21   | 7     | 2  | 42              | 14     |        |          |  |
| chr3:113791425-113801250  | 9826      | 42         | 9    | 42      | 5     | 15    | 2  | 0      | 6     | 10   | 1     | 9  | 6               |        |        |          |  |
| chr3:3889925-39313125     | 413201    | 42         | 20   | 12      | 20    | 13    | 10 | 23     | 7     | 29   | 32    | 14 | 42              | 23     |        |          |  |
| chr1:223242600-223310100  | 67501     | 42         | 14   | 6       | 9     | 4     | 6  | 25     | 6     | 13   | 42    | 3  | 10              | 29     |        |          |  |
| chr21:20244475-20681850   | 437376    | 42         | 20   | 12      | 42    | 12    | 9  | 21     | 6     | 21   | 31    | 13 | 32              | 25     |        |          |  |
| chr11:128428400-128530950 | 102551    | 42         | 16   | 7       | 12    | 7     | 13 | 25     | 6     | 18   | 42    | 7  | 15              | 28     |        |          |  |
| chr12:45059775-45107700   | 47926     | 41         | 19   | 8       | 16    | 9     | 9  | 31     | 7     | 16   | 41    | 15 | 29              | 25     |        |          |  |
| chr7:93066750-93219450    | 152701    | 41         | 19   | 11      | 15    | 14    | 8  | 41     | 9     | 22   | 35    | 12 | 23              | 18     |        |          |  |
| chr12:131170325-131183625 | 13301     | 41         | 10   | 4       | 22    | 4     | 3  | 5      | 7     | 11   | 5     | 2  | 41              | 6      |        |          |  |
| chrX:131196250-131276325  | 80076     | 41         | 23   | 19      | 18    | 16    | 11 | 41     | 6     | 25   | 40    | 13 | 29              | 32     |        |          |  |
| chr13:108675775-10872925  | 53751     | 41         | 7    | 3       | 4     | 2     | 2  | 4      | 2     | 41   | 5     | 3  | 4               | 4      |        |          |  |
| chr4:120611850-120629500  | 17651     | 40         | 16   | 12      | 9     | 10    | 7  | 26     | 4     | 16   | 40    | 9  | 26              | 20     |        |          |  |
| chr18:31361475-31448725   | 87251     | 40         | 17   | 10      | 21    | 13    | 8  | 15     | 7     | 16   | 34    | 5  | 40              | 24     |        |          |  |
| chr18:33973225-34880125   | 906901    | 40         | 28   | 19      | 40    | 18    | 16 | 36     | 11    | 36   | 35    | 19 | 35              | 37     |        |          |  |
| chr10:6819700-6929500     | 109801    | 40         | 19   | 9       | 15    | 9     | 12 | 19     | 13    | 31   | 40    | 11 | 30              | 21     |        |          |  |
| chr7:108939950-109124550  | 184601    | 40         | 19   | 10      | 19    | 11    | 10 | 24     | 5     | 23   | 40    | 10 | 31              | 23     |        |          |  |
| chr12:40410875-40597275   | 186401    | 39         | 20   | 14      | 16    | 20    | 7  | 28     | 5     | 27   | 39    | 8  | 28              | 25     |        |          |  |
| chrX:13350375-133510625   | 7051      | 39         | 7    | 1       | 0     | 1     | 1  | 9      | 0     | 1    | 39    | 3  | 4               | 15     |        |          |  |
| chr16:21928100-21978250   | 50151     | 39         | 17   | 7       | 16    | 12    | 6  | 19     | 7     | 17   | 39    | 7  | 37              | 20     |        |          |  |
| chr3:64927975-64938675    | 10701     | 39         | 6    | 1       | 3     | 2     | 1  | 6      | 0     | 6    | 39    | 2  | 2               | 5      |        |          |  |
| chr2:61010650-61020850    | 10201     | 39         | 14   | 8       | 8     | 8     | 6  | 13     | 10    | 24   | 19    | 9  | 39              | 8      |        |          |  |
| chr4:80685625-80990600    | 304976    | 39         | 21   | 15      | 21    | 23    | 9  | 34     | 6     | 19   | 39    | 18 | 25              | 28     |        |          |  |
| chr11:70199775-70396875   | 197101    | 39         | 14   | 5       | 39    | 3     | 9  | 38     | 12    | 26   | 5     | 3  | 7               | 9      |        |          |  |
| chrX:63275525-63315950    | 40426     | 39         | 9    | 5       | 6     | 5     | 5  | 13     | 3     | 5    | 39    | 4  | 9               | 10     |        |          |  |
| chr13:49505400-49521157   | 15758     | 39         | 13   | 9       | 8     | 7     | 3  | 8      | 3     | 20   | 15    | 17 | 39              | 10     |        |          |  |
| chr1:17623625-176271000   | 38376     | 39         | 12   | 9       | 13    | 7     | 4  | 39     | 5     | 6    | 16    | 9  | 22              | 8      |        |          |  |
| chr4:129552425-129700850  | 148426    | 38         | 23   | 28      | 18    | 15    | 7  | 36     | 5     | 33   | 37    | 9  | 25              | 38     |        |          |  |
| chr6:152061150-152115700  | 54551     | 38         | 9    | 5       | 5     | 5     | 2  | 12     | 7     | 8    | 38    | 4  | 11              | 7      |        |          |  |
| chr7:30183275-30279675    | 96401     | 38         | 16   | 22      | 11    | 9     | 5  | 18     | 2     | 24   | 38    | 7  | 35              | 11     |        |          |  |
| chr8:122077375-122309675  | 232301    | 38         | 19   | 11      | 23    | 11    | 9  | 18     | 11    | 14   | 27    | 38 | 22              | 20     |        |          |  |
| chr5:18520075-18782025    | 261951    | 38         | 14   | 7       | 14    | 7     | 8  | 13     | 4     | 22   | 16    | 6  | 38              | 15     |        |          |  |
| chr13:108099550-108132225 | 103676    | 38         | 12   | 4       | 9     | 8     | 13 | 12     | 1     | 8    | 38    | 3  | 7               | 23     |        |          |  |
| chr14:97429125-98123725   | 694601    | 38         | 25   | 16      | 34    | 14    | 19 | 37     | 12    | 38   | 35    | 10 | 35              | 27     |        |          |  |
| chr11:121023500-121139975 | 116476    | 38         | 8    | 3       | 11    | 4     | 4  | 6      | 2     | 10   | 7     | 3  | 38              | 7      |        |          |  |
| chr8:91182275-91466575    | 284301    | 38         | 19   | 12      | 23    | 12    | 12 | 25     | 5     | 16   | 38    | 12 | 24              | 25     |        |          |  |
| chr2:239037850-239126125  | 88276     | 38         | 10   | 5       | 8     | 4     | 7  | 9      | 2     | 8    | 11    | 4  | 15              | 38     |        |          |  |
| chr3:42031400-4208025     | 49126     | 37         | 17   | 14      | 30    | 13    | 6  | 21     | 6     | 24   | 18    | 9  | 37              | 14     |        |          |  |
| chr1:217494600-217545100  | 50501     | 37         | 13   | 9       | 7     | 9     | 6  | 17     | 2     | 9    | 37    | 19 | 13              | 12     |        |          |  |
| chr3:158376800-158454175  | 77376     | 37         | 16   | 9       | 14    | 7     | 6  | 19     | 14    | 37   | 16    | 7  | 23              | 22     |        |          |  |
| chr3:44017175-44136825    | 119651    | 37         | 9    | 1       | 6     | 1     | 17 | 37     | 1     | 8    | 2     | 1  | 23              | 5      |        |          |  |
| chr3:5443625-5798075      | 354451    | 37         | 23   | 15      | 24    | 12    | 11 | 28     | 7     | 34   | 37    | 13 | 34              | 37     |        |          |  |
| chr6:98325525-98699475    | 373951    | 37         | 22   | 16      | 26    | 13    | 17 | 26     | 8     | 23   | 37    | 13 | 27              | 32     |        |          |  |
| chr2:64266275-64379225    | 112951    | 37         | 9    | 3       | 7     | 4     | 4  | 7      | 1     | 10   | 6     | 2  | 37              | 12     |        |          |  |
| chr6:20056200-20196375    | 140176    | 36         | 19   | 13      | 28    | 13    | 8  | 16     | 17    | 18   | 36    | 22 | 23              | 19     |        |          |  |
| chr8:126787400-127048475  | 261076    | 36         | 17   | 9       | 20    | 9     | 8  | 17     | 11    | 36   | 19    | 6  | 36              | 20     |        |          |  |
| chr16:72904500-72918375   | 13876     | 36         | 19   | 9       | 34    | 10    | 9  | 31     | 3     | 12   | 36    | 12 | 30              | 18     |        |          |  |
| chr2:145164825-145304400  | 139576    | 36         | 10   | 6       | 10    | 5     | 4  | 9      | 3     | 10   | 14    | 5  | 11              | 36     |        |          |  |
| chr1:172235150-172257677  | 22528     | 36         | 13   | 7       | 13    | 9     | 4  | 15     | 3     | 15   | 22    | 5  | 36              | 11     |        |          |  |
| chr5:43102225-43120425    | 18201     | 36         | 17   | 14      | 18    | 12    | 12 | 22     | 3     | 13   | 36    | 11 | 34              | 17     |        |          |  |
| chr21:9722975-9895475     | 172501    | 36         | 9    | 9       | 30    | 9     | 10 | 29     | 5     | 10   | 36    | 6  | 14              | 25     |        |          |  |
| chrX:4475750-5016575      | 540826    | 36         | 21   | 20      | 30    | 18    | 11 | 20     | 14    | 36   | 30    | 10 | 23              | 26     |        |          |  |
| chr13:40314375-40358125   | 43751     | 36         | 19   | 9       | 25    | 15    | 9  | 23     | 5     | 18   | 30    | 9  | 35              | 33     |        |          |  |
| chr12:96400875-96429925   | 29051     | 36         | 7    | 0       | 1     | 2     | 8  | 36     | 0     | 10   | 2     | 0  | 0               | 16     |        |          |  |
| chrX:53701825-53727175    | 25351     | 36         | 16   | 11      | 13    | 11    | 8  | 20     | 8     | 16   | 36    | 7  | 28              | 22     |        |          |  |
| chr5:27762975-28081775    | 318801    | 36         | 21   | 12      | 23    | 11    | 13 | 30     | 5     | 28   | 36    | 14 | 26              | 35     |        |          |  |
| chr6:72090100-72115900    | 25801     | 36         | 8    | 6       | 2     | 5     | 3  | 36     | 2     | 10   | 5     | 7  | 5               | 5      |        |          |  |
| chr7:30552675-30585400    | 32726     | 36         | 20   | 24      | 23    | 14    | 13 | 28     | 4     | 22   | 25    | 14 | 36              | 20     |        |          |  |
| chr3:190327775-190360400  | 32626     | 35         | 13   | 35      | 5     | 8     | 1  | 5      | 17    | 17   | 10    | 18 | 9               | 15     |        |          |  |
| chr14:70090650-70114250   | 23601     | 35         | 16   | 10      | 11    | 10    | 17 | 16     | 3     | 12   | 35    | 25 | 19              | 17     |        |          |  |
| chr6:158578775-158644850  | 66076     | 35         | 21   | 16      | 29    | 13    | 13 | 31     | 8     | 22   | 35    | 9  | 30              | 26     |        |          |  |
| chr6:118763025-118848700  | 85676     | 35         | 10   | 4       | 8     | 6     | 3  | 7      | 2     | 6    | 11    | 35 | 13              | 9      |        |          |  |
| chr2:70121450-70166850    | 45401     | 35         | 16   | 10      | 18    | 9     | 8  | 22     | 7     | 13   | 35    | 12 | 23              | 23     |        |          |  |
| chr10:124977275-125220900 | 243626    | 35         | 16   | 7       | 31    | 11    | 8  | 11     | 3     | 19   | 26    | 6  | 35              | 19     |        |          |  |
| chr10:79193175-79209400   | 16226     | 35         | 7    | 4       | 4     | 1     | 3  | 6      | 3     | 8    | 5     | 3  | 9               | 35     |        |          |  |
| chr12:58661275-59020350   | 359076    | 35         | 15   | 10      | 14    | 9     | 7  | 14     | 5     | 18   | 20    | 10 | 35              | 22     |        |          |  |
| chr11:11652675-11823525   | 170951    | 35         | 21   | 16      | 27    | 18    | 14 | 21     | 8     | 28   | 35    | 15 | 25              | 29     |        |          |  |
| chr13:17879250-18142350   | 263101    | 35         | 21   | 35      | 24    | 12    | 25 | 21     | 17    | 20   | 27    | 9  | 17              | 26     |        |          |  |
| chr5:173017250-17329650   | 212401    | 34         | 13   | 27      | 12    | 4     | 8  | 12     | 34    | 9    | 8     | 5  | 13              | 7      |        |          |  |
| chr3:171889875-17195950   | 64076     | 34         | 8    | 2       | 3     | 4     | 14 | 3      | 1     | 5    | 34    | 2  | 2               | 15     |        |          |  |
| chr10:53930025-54182600   | 252576    | 34         | 17   | 12      | 26    | 15    | 13 | 19     | 7     | 20   | 34    | 8  | 20              | 17     |        |          |  |
| chr1:35413250-35421400    | 8151      | 34         | 14   | 11      | 10    | 9     | 9  | 18     | 4     | 11   | 34    | 9  | 23              | 13     |        |          |  |
| chr3:161693475-161700625  | 7151      | 34         | 11   | 9       | 5     | 14    | 9  | 7      | 8     | 6    | 9     | 34 | 13              | 7      |        |          |  |
| chr6:14904575-15226225    | 321651    | 34         | 19   | 12      | 34    | 10    | 9  | 16     | 10    | 28   | 26    | 7  | 22              | 32     |        |          |  |
| chr7:6408850-64099775     | 10926     | 33         | 8    | 33      | 5     | 5     | 4  | 6      | 1     | 5    | 7     | 1  | 10              | 15     |        |          |  |
| chr7:7042600-7120400      | 77801     | 33         | 13   | 7       | 19    | 7     | 8  | 33     | 4     | 13   | 14    | 5  | 14              | 15     |        |          |  |
| chr2:233144650-233160800  | 16151     | 33         | 18   | 12      | 15    | 16    | 33 | 28     | 14    | 10   | 12    | 12 | 22              | 17     |        |          |  |

| location                  | span (nt) | hypothalam |      |         |       |       |    |        |       |      |       |    |    |    | skeletal muscle | spleen | testes | Comments |
|---------------------------|-----------|------------|------|---------|-------|-------|----|--------|-------|------|-------|----|----|----|-----------------|--------|--------|----------|
|                           |           | max        | mean | adipose | colon | heart | us | kidney | liver | lung | ovary |    |    |    |                 |        |        |          |
| chr18:40170025-40351650   | 181626    | 29         | 18   | 10      | 20    | 11    | 9  | 26     | 11    | 21   | 29    | 10 | 24 | 26 |                 |        |        |          |
| chr11:133854275-133909025 | 54751     | 29         | 8    | 2       | 29    | 2     | 2  | 27     | 3     | 6    | 6     | 2  | 5  | 5  |                 |        |        |          |
| chr3:172974575-173020300  | 45726     | 29         | 8    | 6       | 17    | 4     | 4  | 3      | 3     | 5    | 29    | 1  | 14 | 5  |                 |        |        |          |
| chr1:70914525-71011625    | 97101     | 28         | 8    | 5       | 5     | 5     | 3  | 28     | 3     | 9    | 10    | 4  | 7  | 9  |                 |        |        |          |
| chr3:36894500-36969325    | 74826     | 28         | 13   | 8       | 23    | 7     | 7  | 6      | 4     | 18   | 27    | 2  | 28 | 12 |                 |        |        |          |
| chr13:21470600-21702150   | 231551    | 28         | 13   | 9       | 15    | 6     | 3  | 28     | 7     | 17   | 6     | 2  | 23 | 27 |                 |        |        |          |
| chr1:59032550-59113800    | 81251     | 28         | 10   | 6       | 12    | 3     | 7  | 12     | 1     | 10   | 28    | 9  | 19 | 8  |                 |        |        |          |
| chr2:157897775-157942400  | 44626     | 28         | 10   | 6       | 8     | 5     | 4  | 8      | 3     | 18   | 13    | 4  | 28 | 9  |                 |        |        |          |
| chr4:53272125-53310900    | 38776     | 28         | 10   | 3       | 10    | 6     | 5  | 10     | 7     | 17   | 11    | 4  | 9  | 28 |                 |        |        |          |
| chr4:54914475-55161475    | 247001    | 28         | 15   | 8       | 23    | 9     | 7  | 18     | 7     | 20   | 28    | 6  | 19 | 21 |                 |        |        |          |
| chr3:16392775-16433150    | 405236    | 28         | 15   | 9       | 22    | 10    | 9  | 22     | 17    | 4    | 15    | 28 | 9  | 21 |                 |        |        |          |
| chr3:2198150-2222350      | 24201     | 28         | 15   | 11      | 19    | 10    | 6  | 27     | 7     | 15   | 28    | 7  | 19 | 15 |                 |        |        |          |
| chr9:2193975-2294325      | 100351    | 28         | 10   | 5       | 6     | 4     | 4  | 7      | 7     | 28   | 22    | 4  | 12 | 9  |                 |        |        |          |
| chr4:50921225-51011000    | 89776     | 27         | 10   | 5       | 9     | 5     | 6  | 10     | 2     | 9    | 27    | 6  | 20 | 11 |                 |        |        |          |
| chr2:46863875-46966525    | 102651    | 27         | 10   | 7       | 10    | 4     | 7  | 7      | 5     | 27   | 17    | 7  | 12 | 9  |                 |        |        |          |
| chr11:115542275-115819825 | 277551    | 27         | 10   | 6       | 15    | 5     | 11 | 27     | 10    | 8    | 7     | 3  | 8  | 13 |                 |        |        |          |
| chr7:7895500-7963275      | 67776     | 27         | 12   | 7       | 8     | 6     | 4  | 15     | 2     | 16   | 27    | 14 | 20 | 16 |                 |        |        |          |
| chr4:6755350-6907125      | 151776    | 27         | 17   | 13      | 22    | 11    | 8  | 25     | 6     | 18   | 26    | 12 | 27 | 20 |                 |        |        |          |
| chr22:16799450-16847225   | 47776     | 27         | 13   | 5       | 27    | 11    | 7  | 21     | 3     | 12   | 14    | 7  | 21 | 14 |                 |        |        |          |
| chr12:9371350-9397650     | 26301     | 27         | 4    | 1       | 2     | 1     | 1  | 3      | 1     | 2    | 2     | 1  | 2  | 27 |                 |        |        |          |
| chr1:118176175-118202375  | 26201     | 27         | 13   | 10      | 5     | 16    | 18 | 27     | 4     | 10   | 14    | 13 | 16 | 12 |                 |        |        |          |
| chr6:147231675-147541450  | 309776    | 26         | 15   | 6       | 22    | 9     | 14 | 12     | 4     | 16   | 26    | 6  | 25 | 26 |                 |        |        |          |
| chrX:100582750-100611900  | 29151     | 26         | 10   | 7       | 10    | 5     | 4  | 14     | 2     | 9    | 26    | 7  | 15 | 13 |                 |        |        |          |
| chr10:97629600-97656950   | 27351     | 26         | 10   | 5       | 7     | 8     | 4  | 14     | 2     | 12   | 15    | 4  | 26 | 10 |                 |        |        |          |
| chr2:74066300-74115525    | 49226     | 26         | 11   | 10      | 26    | 8     | 3  | 10     | 3     | 17   | 11    | 2  | 25 | 6  |                 |        |        |          |
| chr6:126421650-126451675  | 30026     | 26         | 10   | 3       | 5     | 6     | 4  | 21     | 11    | 5    | 26    | 10 | 14 | 8  |                 |        |        |          |
| chr4:116354750-116650400  | 295651    | 26         | 15   | 10      | 20    | 11    | 9  | 17     | 5     | 18   | 23    | 7  | 19 | 26 |                 |        |        |          |
| chr19:52838475-52873175   | 34701     | 26         | 10   | 7       | 26    | 7     | 5  | 9      | 2     | 14   | 9     | 10 | 13 | 9  |                 |        |        |          |
| chr2:81715400-81955300    | 239901    | 26         | 14   | 10      | 17    | 9     | 8  | 18     | 5     | 13   | 26    | 9  | 19 | 20 |                 |        |        |          |
| chr13:37514150-37567175   | 53026     | 26         | 13   | 6       | 8     | 23    | 6  | 26     | 4     | 11   | 22    | 6  | 12 | 15 |                 |        |        |          |
| chr2:216786600-216817600  | 31001     | 26         | 10   | 10      | 6     | 6     | 26 | 9      | 3     | 11   | 9     | 10 | 11 | 7  |                 |        |        |          |
| chr11:23093750-23240675   | 146926    | 26         | 14   | 7       | 21    | 8     | 14 | 17     | 5     | 17   | 26    | 7  | 19 | 17 |                 |        |        |          |
| chr2:31919400-31946050    | 26651     | 25         | 11   | 4       | 7     | 8     | 5  | 9      | 4     | 9    | 19    | 16 | 25 | 12 |                 |        |        |          |
| chr14:60598575-60663800   | 65226     | 25         | 14   | 16      | 13    | 7     | 8  | 18     | 2     | 16   | 25    | 16 | 14 | 19 |                 |        |        |          |
| chr4:24126625-24137100    | 10476     | 25         | 10   | 2       | 5     | 7     | 9  | 10     | 2     | 10   | 25    | 8  | 21 | 7  |                 |        |        |          |
| chr1:171471125-171555075  | 83951     | 25         | 13   | 6       | 9     | 8     | 7  | 15     | 6     | 16   | 25    | 8  | 23 | 14 |                 |        |        |          |
| chr2:91630925-91689950    | 58576     | 25         | 15   | 19      | 23    | 16    | 17 | 17     | 8     | 7    | 13    | 12 | 3  | 25 |                 |        |        |          |
| chr6:127722975-127746550  | 23576     | 25         | 11   | 6       | 7     | 10    | 5  | 12     | 8     | 13   | 25    | 6  | 15 | 15 |                 |        |        |          |
| chr5:123269425-123559950  | 290526    | 25         | 15   | 10      | 17    | 12    | 12 | 15     | 5     | 18   | 25    | 10 | 19 | 20 |                 |        |        |          |
| chr13:109079875-109141250 | 61376     | 25         | 8    | 3       | 6     | 4     | 5  | 5      | 2     | 12   | 7     | 3  | 25 | 13 |                 |        |        |          |
| chr7:63559775-63598600    | 38826     | 25         | 8    | 4       | 6     | 5     | 6  | 9      | 2     | 9    | 25    | 3  | 11 | 12 |                 |        |        |          |
| chr4:7154500-7226600      | 72101     | 25         | 13   | 8       | 8     | 9     | 23 | 25     | 9     | 13   | 11    | 11 | 16 | 10 |                 |        |        |          |
| chr14:95058100-95070625   | 12526     | 25         | 12   | 9       | 15    | 5     | 8  | 10     | 7     | 11   | 25    | 7  | 23 | 13 |                 |        |        |          |
| chr2:40800500-41088800    | 282801    | 25         | 14   | 12      | 19    | 10    | 9  | 12     | 5     | 23   | 25    | 7  | 12 | 23 |                 |        |        |          |
| chr6:662825-6756250       | 127726    | 25         | 11   | 11      | 10    | 7     | 4  | 25     | 5     | 13   | 12    | 13 | 9  | 18 |                 |        |        |          |
| chr1:85705400-85746650    | 41251     | 25         | 10   | 5       | 3     | 13    | 4  | 7      | 5     | 18   | 13    | 6  | 25 | 8  |                 |        |        |          |
| chrX:62428575-62446375    | 17801     | 24         | 11   | 8       | 5     | 9     | 24 | 8      | 4     | 7    | 18    | 8  | 11 | 14 |                 |        |        |          |
| chr7:37575125-37663375    | 88251     | 24         | 13   | 5       | 12    | 7     | 19 | 13     | 7     | 12   | 18    | 8  | 24 | 23 |                 |        |        |          |
| chr11:120733150-120748050 | 14901     | 24         | 13   | 10      | 13    | 19    | 13 | 10     | 6     | 10   | 20    | 11 | 6  | 24 |                 |        |        |          |
| chr1:93931500-9406425     | 134926    | 24         | 16   | 11      | 16    | 14    | 8  | 19     | 4     | 19   | 24    | 23 | 20 | 20 |                 |        |        |          |
| chr5:169491450-169587275  | 95826     | 24         | 5    | 2       | 4     | 1     | 1  | 24     | 1     | 5    | 4     | 1  | 4  | 3  |                 |        |        |          |
| chr12:45330500-45384750   | 54251     | 24         | 10   | 3       | 8     | 4     | 5  | 24     | 7     | 9    | 19    | 10 | 11 | 12 |                 |        |        |          |
| chr11:12937650-1296350    | 27701     | 24         | 4    | 0       | 1     | 1     | 3  | 24     | 0     | 2    | 1     | 2  | 1  | 6  |                 |        |        |          |
| chr19:11961475-11976575   | 15101     | 24         | 7    | 5       | 7     | 4     | 3  | 5      | 7     | 24   | 5     | 3  | 6  | 10 |                 |        |        |          |
| chr22:30445350-30475986   | 30637     | 24         | 13   | 12      | 23    | 9     | 10 | 13     | 4     | 10   | 22    | 4  | 24 | 15 |                 |        |        |          |
| chr7:17279150-172829100   | 99951     | 24         | 9    | 4       | 10    | 12    | 3  | 5      | 4     | 9    | 10    | 24 | 6  | 9  |                 |        |        |          |
| chr12:5102450-5197825     | 95376     | 24         | 7    | 6       | 24    | 3     | 5  | 6      | 2     | 11   | 5     | 3  | 5  | 6  |                 |        |        |          |
| chr1:209631400-209656375  | 24976     | 24         | 9    | 5       | 8     | 5     | 4  | 12     | 5     | 7    | 13    | 3  | 13 | 24 |                 |        |        |          |
| chr1:23477400-23492375    | 14976     | 24         | 10   | 4       | 7     | 5     | 3  | 11     | 3     | 8    | 24    | 10 | 20 | 14 |                 |        |        |          |
| chr13:83475500-83726025   | 250526    | 24         | 9    | 5       | 9     | 4     | 5  | 7      | 5     | 18   | 10    | 4  | 11 | 24 |                 |        |        |          |
| chr8:29402750-29731425    | 328676    | 24         | 16   | 13      | 20    | 10    | 11 | 16     | 8     | 17   | 24    | 23 | 23 | 14 |                 |        |        |          |
| chr2:63825225-63857575    | 32351     | 24         | 6    | 23      | 2     | 2     | 3  | 2      | 3     | 2    | 5     | 24 | 3  | 4  |                 |        |        |          |
| chr2:111674975-111729375  | 54401     | 23         | 9    | 6       | 5     | 9     | 5  | 9      | 1     | 14   | 14    | 3  | 23 | 6  |                 |        |        |          |
| chr2:183740700-183793025  | 52326     | 23         | 9    | 4       | 9     | 6     | 3  | 8      | 3     | 9    | 23    | 9  | 17 | 10 |                 |        |        |          |
| chr5:148209825-148249425  | 39601     | 23         | 9    | 10      | 4     | 11    | 3  | 3      | 2     | 23   | 3     | 20 | 13 | 2  |                 |        |        |          |
| chr9:131132400-131148400  | 16001     | 23         | 6    | 4       | 1     | 4     | 4  | 23     | 1     | 8    | 3     | 1  | 10 | 3  |                 |        |        |          |
| chr3:158291000-158313675  | 22676     | 23         | 3    | 1       | 1     | 23    | 1  | 1      | 1     | 3    | 1     | 1  | 1  | 1  |                 |        |        |          |
| chr12:61283950-61301575   | 17626     | 23         | 9    | 5       | 5     | 7     | 4  | 13     | 4     | 10   | 15    | 8  | 23 | 6  |                 |        |        |          |
| chr2:193651275-193911400  | 260126    | 23         | 13   | 10      | 14    | 8     | 7  | 15     | 5     | 14   | 23    | 7  | 21 | 15 |                 |        |        |          |
| chr5:111819800-111931900  | 112101    | 23         | 13   | 10      | 14    | 8     | 6  | 16     | 4     | 14   | 21    | 6  | 23 | 16 |                 |        |        |          |
| chr6:33913800-33955400    | 41601     | 23         | 3    | 1       | 2     | 1     | 1  | 23     | 0     | 1    | 1     | 0  | 1  | 4  |                 |        |        |          |
| chr18:31720150-31782325   | 62176     | 23         | 8    | 4       | 7     | 6     | 3  | 15     | 2     | 5    | 10    | 3  | 7  | 23 |                 |        |        |          |
| chr13:31411725-31443975   | 32251     | 23         | 6    | 5       | 3     | 23    | 1  | 7      | 3     | 6    | 7     | 3  | 5  | 4  |                 |        |        |          |
| chr7:92358275-92489825    | 131551    | 23         | 14   | 10      | 16    | 9     | 8  | 15     | 8     | 23   | 21    | 6  | 16 | 20 |                 |        |        |          |
| chr3:114236500-114337000  | 100501    | 23         | 11   | 5       | 13    | 9     | 7  | 12     | 3     | 9    | 23    | 7  | 21 | 14 |                 |        |        |          |
| chr19:7320850-7339925     | 19076     | 23         | 5    | 1       | 11    | 2     | 2  | 2      | 0     | 4    | 3     | 1  | 23 | 2  |                 |        |        |          |
| chrX:119246975-11925025   | 22051     | 23         | 8    | 12      | 5     | 4     | 5  | 8      | 4     | 7    | 23    | 4  | 13 | 7  |                 |        |        |          |
| chr2:165216625-165233250  | 189236    | 23         | 7    | 2       | 2     | 3     | 2  | 23     | 5     | 6    | 8     | 2  | 11 | 21 |                 |        |        |          |
| chr7:96103850-96148750    | 44901     | 23         | 9    | 3       | 7     | 9     | 4  | 12     | 2     | 7    | 23    | 9  | 19 | 7  |                 |        |        |          |
| chr18:51712175-51765200   | 53026     | 23         | 4    | 0       | 1     | 1     | 1  | 3      | 1     | 3    | 23    | 0  | 11 | 3  |                 |        |        |          |
| chr6:111912800-111930550  | 17751     | 23         | 10   | 11      | 7     | 5     | 5  | 10     | 3     | 14   | 23    | 7  | 15 | 12 |                 |        |        |          |
| chrX:64926450-65001925    | 75476     | 23         | 15   | 11      | 13    | 14    | 11 | 18     | 9     | 15   | 22    | 12 | 23 | 21 |                 |        |        |          |
| chr18:34964525-35098275   | 133751    | 23         | 6    | 3       | 6     | 2     | 2  | 9      | 2     | 6    | 7     | 3  | 6  | 23 |                 |        |        |          |
| chr11:59416375-59538600   | 122226    | 23         | 11   | 6       | 12    | 8     | 7  | 18     | 4     | 10   | 23    | 6  | 16 | 15 |                 |        |        |          |
| chr5:52567275-52762975    | 195701    | 22         | 11   | 7       | 15    | 7     | 5  | 11     | 3     | 11   | 22    | 7  | 15 | 15 |                 |        |        |          |
| chr4:15266300-15304725    | 38426     | 22         | 15   | 17      | 7     | 11    | 19 | 22     | 9     | 15   | 16    | 6  | 22 | 17 |                 |        |        |          |
| chr1:58845000-58872925    | 27926     | 22         | 9    | 9       | 8     | 7     | 5  | 22     | 12    | 8    | 6     | 5  | 9  | 7  |                 |        |        |          |
| chr20:57146000-57188600   | 42601     | 22         | 5    | 0       | 4     | 1     | 2  | 2      | 0     | 11   | 2     | 0  | 22 | 4  |                 |        |        |          |
| chr2:64956975-65041825    | 84851     | 22         | 10   | 7       | 12    | 4     | 6  | 9      | 3     | 10   | 11    | 6  | 22 | 14 |                 |        |        |          |
| chr5:117175975-117309050  | 133076    | 22         | 14   | 6       | 13    | 15    | 9  | 19     | 4     | 18   | 21    | 6  | 22 | 20 |                 |        |        |          |
| chr21:16915600-16926550   | 10951     | 22         | 4    | 3       | 1     | 2     | 1  | 4      | 1     | 2    | 22    | 3  | 0  | 5  |                 |        |        |          |
| chr11:34675025-34851400   | 176376    | 22         | 14   | 8       | 19    | 10    | 12 | 14     | 4     | 15   | 20    | 8  | 21 | 22 |                 |        |        |          |
| chr1:203936725-203948947  | 12223     | 22         | 7    | 2       | 5     | 4     | 3  | 5      | 2     | 4    | 16    | 6  | 22 | 6  |                 |        |        |          |
| chr10:110110175-110275525 | 165351    | 22         | 11   | 6       | 14    | 6     | 6  | 22     | 3     | 9    | 18    | 6  | 17 | 16 |                 |        |        |          |
| chr8:8814750-8878550      | 63801     | 22         | 10   | 7       | 11    | 5     | 7  | 22     | 2     | 19   | 9     | 3  | 14 | 8  |                 |        |        |          |
| chr1:191151850-191212425  | 60576     | 22         | 9    | 6       | 5     | 6     | 4  | 5      | 5     | 17   | 6     | 22 | 11 | 13 |                 |        |        |          |
| chr4:108966225-109026800  | 60576     | 22         | 9    | 5       | 9     | 12    | 4  | 16     | 10    | 22   |       |    |    |    |                 |        |        |          |

| location                  | span (nt) | mean |      | hypothalam |       |       |    |        |       |      |       | skeletal |        |        | Comments |
|---------------------------|-----------|------|------|------------|-------|-------|----|--------|-------|------|-------|----------|--------|--------|----------|
|                           |           | max  | mean | adipose    | colon | heart | us | kidney | liver | lung | ovary | muscle   | spleen | testes |          |
| chr7:9904850-10020150     | 115301    | 20   | 6    | 3          | 6     | 3     | 2  | 6      | 2     | 6    | 8     | 3        | 7      | 20     |          |
| chr17:30860150-30875450   | 15301     | 20   | 5    | 3          | 3     | 3     | 1  | 3      | 2     | 12   | 5     | 2        | 20     | 2      |          |
| chr3:71738000-71797250    | 59251     | 20   | 8    | 4          | 7     | 3     | 3  | 6      | 2     | 18   | 15    | 2        | 20     | 6      |          |
| chr5:17553025-175540750   | 10426     | 20   | 3    | 0          | 1     | 0     | 0  | 1      | 0     | 0    | 12    | 0        | 2      | 20     |          |
| chr1:22292500-22313675    | 21176     | 20   | 8    | 3          | 10    | 6     | 2  | 7      | 2     | 8    | 18    | 6        | 20     | 6      |          |
| chr13:30077400-30089300   | 11901     | 20   | 5    | 3          | 2     | 1     | 2  | 5      | 0     | 2    | 20    | 4        | 6      | 4      |          |
| chr11:1734725-17362725    | 28001     | 20   | 8    | 2          | 11    | 3     | 17 | 20     | 1     | 5    | 10    | 10       | 6      | 7      |          |
| chr9:21481050-21587675    | 106626    | 20   | 11   | 6          | 7     | 5     | 5  | 17     | 8     | 20   | 15    | 4        | 12     | 16     |          |
| chr6:129882650-129921300  | 38651     | 20   | 8    | 7          | 5     | 6     | 3  | 14     | 1     | 20   | 11    | 4        | 9      | 5      |          |
| chr18:4368300-4442750     | 74451     | 20   | 7    | 2          | 6     | 2     | 12 | 2      | 0     | 7    | 20    | 11       | 6      | 20     |          |
| chr10:71853850-71862675   | 7026      | 20   | 13   | 19         | 6     | 14    | 8  | 20     | 9     | 12   | 14    | 11       | 8      | 11     |          |
| chr2:187712425-187798175  | 85751     | 20   | 6    | 6          | 4     | 4     | 2  | 7      | 1     | 7    | 12    | 2        | 7      | 20     |          |
| chr1:101291125-101334500  | 43376     | 20   | 6    | 3          | 3     | 4     | 2  | 7      | 1     | 6    | 9     | 3        | 20     | 6      |          |
| chr18:956025-1015450      | 59426     | 20   | 7    | 4          | 8     | 4     | 3  | 7      | 2     | 7    | 20    | 3        | 9      | 8      |          |
| chr1:15819825-158225975   | 27151     | 20   | 3    | 2          | 20    | 1     | 1  | 1      | 1     | 2    | 1     | 1        | 1      | 1      |          |
| chr8:142313025-142336125  | 23101     | 20   | 8    | 4          | 8     | 7     | 16 | 12     | 1     | 8    | 6     | 3        | 8      | 20     |          |
| chr21:38511875-38532825   | 20951     | 19   | 5    | 3          | 1     | 2     | 1  | 2      | 5     | 19   | 1     | 1        | 12     | 7      |          |
| chr18:66398450-66514300   | 115851    | 19   | 10   | 5          | 11    | 4     | 6  | 17     | 7     | 15   | 9     | 4        | 8      | 19     |          |
| chr7:32919525-32950200    | 30676     | 19   | 11   | 11         | 16    | 9     | 10 | 8      | 4     | 16   | 19    | 8        | 12     | 10     |          |
| chrX:64727500-64769875    | 42376     | 19   | 7    | 4          | 10    | 4     | 3  | 7      | 1     | 11   | 19    | 3        | 10     | 7      |          |
| chr4:14744675-14820275    | 75601     | 19   | 11   | 8          | 11    | 12    | 9  | 15     | 3     | 12   | 19    | 6        | 16     | 14     |          |
| chr2:43167775-43268825    | 101051    | 19   | 9    | 5          | 19    | 7     | 4  | 6      | 3     | 14   | 9     | 5        | 16     | 9      |          |
| chr7:45950100-46055950    | 105851    | 19   | 10   | 4          | 10    | 5     | 5  | 11     | 4     | 10   | 19    | 6        | 18     | 15     |          |
| chr7:65806575-65829700    | 23126     | 19   | 9    | 6          | 15    | 5     | 5  | 8      | 6     | 15   | 19    | 3        | 11     | 9      |          |
| chr3:186480050-186516225  | 36176     | 19   | 8    | 4          | 5     | 5     | 6  | 13     | 4     | 6    | 19    | 2        | 10     | 15     |          |
| chr2:207387650-207464200  | 76551     | 19   | 10   | 7          | 8     | 5     | 11 | 19     | 7     | 13   | 14    | 11       | 6      | 10     |          |
| chr4:24416150-24422275    | 6126      | 19   | 7    | 6          | 4     | 7     | 19 | 5      | 3     | 6    | 12    | 3        | 5      | 9      |          |
| chr18:43586600-43607850   | 21251     | 19   | 8    | 5          | 4     | 4     | 7  | 8      | 2     | 9    | 19    | 5        | 13     | 7      |          |
| chr4:9776300-10014350     | 23801     | 19   | 8    | 3          | 9     | 4     | 4  | 8      | 3     | 8    | 15    | 5        | 11     | 19     |          |
| chr5:53893950-54004750    | 110801    | 19   | 9    | 6          | 6     | 8     | 6  | 11     | 6     | 19   | 16    | 4        | 12     | 11     |          |
| chr12:58277175-58299650   | 22476     | 19   | 5    | 1          | 2     | 5     | 1  | 6      | 1     | 6    | 7     | 2        | 19     | 3      |          |
| chr5:141750225-141851975  | 101751    | 19   | 7    | 7          | 8     | 4     | 5  | 7      | 2     | 19   | 5     | 4        | 8      | 5      |          |
| chr6:167309700-167331675  | 21976     | 19   | 7    | 4          | 8     | 2     | 3  | 10     | 2     | 7    | 10    | 2        | 14     | 19     |          |
| chr12:71550025-71815050   | 265026    | 19   | 10   | 7          | 12    | 7     | 6  | 14     | 4     | 10   | 19    | 6        | 15     | 16     |          |
| chr15:54850700-54891650   | 40951     | 19   | 6    | 5          | 4     | 3     | 3  | 6      | 1     | 6    | 19    | 3        | 8      | 8      |          |
| chr19:21530650-21577025   | 46376     | 19   | 8    | 7          | 11    | 4     | 3  | 7      | 1     | 7    | 19    | 7        | 7      | 14     |          |
| chr7:134416925-134469600  | 52676     | 19   | 12   | 11         | 7     | 9     | 10 | 16     | 4     | 8    | 16    | 12       | 17     | 19     |          |
| chr15:28935575-28965125   | 29551     | 19   | 6    | 4          | 5     | 4     | 4  | 3      | 5     | 19   | 4     | 1        | 7      | 13     |          |
| chr2:62348300-62566800    | 218501    | 19   | 12   | 8          | 19    | 8     | 6  | 16     | 7     | 19   | 16    | 5        | 18     | 12     |          |
| chr2:60086175-60209975    | 123801    | 19   | 11   | 7          | 12    | 9     | 6  | 14     | 5     | 11   | 19    | 6        | 14     | 14     |          |
| chr3:87221775-87276850    | 55076     | 19   | 6    | 3          | 9     | 3     | 4  | 5      | 1     | 5    | 19    | 3        | 7      | 7      |          |
| chr2:86718725-86789500    | 70776     | 19   | 9    | 5          | 12    | 5     | 6  | 10     | 3     | 8    | 19    | 5        | 14     | 11     |          |
| chr3:39600250-39734000    | 133751    | 19   | 12   | 10         | 14    | 10    | 8  | 15     | 6     | 17   | 19    | 8        | 13     | 15     |          |
| chr2:1156711975-115681825 | 106551    | 19   | 10   | 4          | 19    | 4     | 4  | 14     | 7     | 17   | 12    | 3        | 9      | 12     |          |
| chr20:35569025-35576975   | 7951      | 19   | 8    | 10         | 11    | 3     | 2  | 9      | 2     | 7    | 10    | 19       | 8      | 4      |          |
| chr2:85039975-85050950    | 10976     | 19   | 8    | 4          | 15    | 4     | 3  | 6      | 2     | 7    | 12    | 6        | 19     | 7      |          |
| chr2:63710675-63736750    | 26076     | 19   | 6    | 19         | 4     | 2     | 2  | 3      | 3     | 3    | 5     | 13       | 5      | 6      |          |
| chr5:115559375-115672450  | 13076     | 18   | 7    | 4          | 4     | 6     | 4  | 11     | 2     | 4    | 18    | 5        | 10     | 7      |          |
| chr18:14043400-14092850   | 49451     | 18   | 9    | 6          | 10    | 5     | 8  | 9      | 3     | 8    | 18    | 4        | 11     | 13     |          |
| chr8:50050850-50118750    | 67901     | 18   | 11   | 7          | 12    | 9     | 6  | 12     | 4     | 13   | 18    | 6        | 14     | 15     |          |
| chr12:66683375-66716700   | 33326     | 18   | 4    | 1          | 4     | 3     | 0  | 1      | 1     | 4    | 1     | 9        | 18     | 1      |          |
| chr12:78463525-78491000   | 27476     | 18   | 8    | 1          | 17    | 3     | 2  | 14     | 4     | 10   | 18    | 1        | 11     | 8      |          |
| chr8:96031525-96053050    | 21526     | 18   | 7    | 4          | 7     | 2     | 3  | 6      | 2     | 8    | 18    | 8        | 10     | 10     |          |
| chr6:14268375-14287575    | 19201     | 18   | 4    | 5          | 1     | 0     | 1  | 3      | 4     | 18   | 2     | 0        | 8      | 2      |          |
| chr10:114579650-114681675 | 102026    | 18   | 11   | 6          | 17    | 6     | 8  | 15     | 3     | 15   | 18    | 7        | 16     | 10     |          |
| chr12:8845700-8847075     | 14876     | 18   | 8    | 2          | 4     | 3     | 3  | 11     | 2     | 8    | 18    | 6        | 17     | 10     |          |
| chr3:107171400-107322450  | 151051    | 18   | 9    | 7          | 10    | 6     | 3  | 7      | 3     | 16   | 13    | 4        | 10     | 18     |          |
| chr9:4859500-4886050      | 26551     | 18   | 8    | 7          | 5     | 3     | 5  | 9      | 4     | 6    | 16    | 18       | 8      | 5      |          |
| chr13:102930525-103035800 | 105276    | 18   | 8    | 5          | 8     | 4     | 3  | 7      | 6     | 18   | 10    | 3        | 7      | 13     |          |
| chr8:128876225-128890125  | 13901     | 18   | 4    | 1          | 4     | 2     | 0  | 1      | 1     | 3    | 18    | 2        | 7      | 4      |          |
| chr5:42999600-43035650    | 36051     | 18   | 5    | 4          | 3     | 4     | 3  | 3      | 3     | 9    | 4     | 2        | 18     | 6      |          |
| chrX:61861575-61957675    | 96101     | 18   | 13   | 15         | 7     | 17    | 15 | 15     | 7     | 11   | 18    | 9        | 18     | 16     |          |
| chr3:132569625-132581425  | 11801     | 18   | 7    | 2          | 4     | 4     | 4  | 16     | 2     | 5    | 18    | 2        | 11     | 4      |          |
| chr4:10580400-10591100    | 10701     | 18   | 3    | 1          | 1     | 1     | 0  | 1      | 3     | 18   | 1     | 0        | 1      | 2      |          |
| chr3:88233150-88258600    | 25451     | 18   | 9    | 6          | 5     | 5     | 3  | 10     | 3     | 15   | 18    | 6        | 15     | 11     |          |
| chrX:148295250-148343850  | 48601     | 18   | 7    | 4          | 8     | 4     | 3  | 8      | 2     | 6    | 18    | 4        | 10     | 9      |          |
| chr3:179056150-179146000  | 89851     | 18   | 10   | 8          | 10    | 7     | 5  | 16     | 8     | 12   | 18    | 5        | 13     | 10     |          |
| chr4:4596450-4633950      | 37501     | 18   | 6    | 5          | 11    | 4     | 7  | 12     | 1     | 4    | 18    | 3        | 12     | 9      |          |
| chr5:80216225-80255550    | 39326     | 18   | 6    | 5          | 4     | 3     | 5  | 18     | 3     | 4    | 6     | 5        | 7      | 4      |          |
| chr18:70409300-70433425   | 24126     | 18   | 7    | 4          | 4     | 5     | 5  | 10     | 3     | 5    | 15    | 2        | 18     | 8      |          |
| chr5:127413650-127433475  | 19826     | 17   | 7    | 4          | 6     | 5     | 4  | 8      | 1     | 5    | 17    | 4        | 17     | 7      |          |
| chr8:2156200-2269600      | 113401    | 17   | 9    | 5          | 17    | 6     | 5  | 13     | 3     | 14   | 14    | 5        | 11     | 12     |          |
| chr1:146173150-146194275  | 21126     | 17   | 8    | 7          | 4     | 5     | 7  | 6      | 4     | 7    | 15    | 2        | 10     | 17     |          |
| chr15:40664800-40688350   | 23551     | 17   | 8    | 6          | 9     | 4     | 2  | 4      | 3     | 17   | 12    | 2        | 7      | 17     |          |
| chr7:34182075-34270925    | 88851     | 17   | 8    | 5          | 10    | 5     | 3  | 10     | 2     | 9    | 17    | 4        | 11     | 11     |          |
| chr10:38813750-38924000   | 110251    | 17   | 4    | 2          | 12    | 1     | 2  | 2      | 0     | 1    | 2     | 1        | 2      | 17     |          |
| chr17:41052691-41073901   | 21211     | 17   | 8    | 4          | 13    | 4     | 8  | 9      | 1     | 7    | 17    | 3        | 14     | 15     |          |
| chr4:84354450-84393075    | 38626     | 17   | 8    | 4          | 8     | 4     | 3  | 9      | 2     | 6    | 17    | 7        | 17     | 12     |          |
| chr3:13109675-131107075   | 73976     | 17   | 8    | 4          | 10    | 5     | 8  | 8      | 2     | 7    | 17    | 4        | 12     | 9      |          |
| chr19:42146075-42209750   | 63676     | 17   | 10   | 4          | 9     | 7     | 12 | 10     | 2     | 9    | 14    | 11       | 17     | 17     |          |
| chr11:70540100-70637075   | 96976     | 17   | 7    | 3          | 16    | 2     | 3  | 17     | 10    | 8    | 5     | 2        | 5      | 5      |          |
| chr7:105313050-105325325  | 12276     | 17   | 6    | 7          | 12    | 1     | 7  | 17     | 1     | 2    | 8     | 1        | 2      | 5      |          |
| chr7:134656800-134676775  | 19976     | 17   | 4    | 4          | 2     | 1     | 1  | 2      | 4     | 17   | 2     | 1        | 1      | 4      |          |
| chr8:90684400-90697825    | 13426     | 17   | 5    | 3          | 2     | 4     | 4  | 9      | 0     | 4    | 17    | 1        | 4      | 6      |          |
| chr5:14984625-149861900   | 15276     | 17   | 7    | 3          | 8     | 5     | 2  | 8      | 5     | 8    | 11    | 1        | 17     | 4      |          |
| chr1:222769950-222845375  | 75426     | 17   | 5    | 3          | 5     | 3     | 5  | 7      | 1     | 5    | 17    | 3        | 7      | 5      |          |
| chr4:123291775-123305200  | 13426     | 17   | 7    | 6          | 6     | 4     | 3  | 9      | 1     | 11   | 17    | 1        | 15     | 9      |          |
| chr3:154391400-154411650  | 20251     | 17   | 7    | 17         | 3     | 3     | 6  | 2      | 5     | 11   | 3     | 2        | 4      | 17     |          |
| chr12:74301700-74547775   | 246076    | 17   | 11   | 7          | 12    | 6     | 6  | 15     | 5     | 14   | 17    | 7        | 13     | 16     |          |
| chr10:89898950-89909300   | 10351     | 17   | 2    | 0          | 0     | 0     | 0  | 1      | 0     | 1    | 0     | 17       | 1      | 1      |          |
| chr12:125726100-125824025 | 97926     | 17   | 7    | 4          | 8     | 3     | 4  | 6      | 5     | 13   | 5     | 2        | 17     | 13     |          |
| chr2:37629600-37715550    | 85951     | 17   | 8    | 5          | 9     | 5     | 3  | 7      | 11    | 12   | 9     | 7        | 17     | 8      |          |
| chr2:143157200-143262500  | 105301    | 17   | 9    | 6          | 10    | 6     | 6  | 10     | 4     | 10   | 14    | 4        | 10     | 17     |          |
| chr5:121017625-121116700  | 99076     | 17   | 9    | 6          | 9     | 6     | 4  | 11     | 4     | 11   | 17    | 6        | 13     | 15     |          |
| chr20:48695925-48741175   | 45251     | 17   | 5    | 3          | 6     | 4     | 2  | 17     | 2     | 3    | 5     | 2        | 3      | 4      |          |
| chr12:52809275-52855625   | 46351     | 17   | 6    | 8          | 17    | 3     | 2  | 9      | 1     | 4    | 6     | 4        | 6      | 9      |          |
| chr11:94940400-95122275   | 181876    | 17   | 8    | 5          | 11    | 5     | 6  | 8      | 2     | 9    | 13    | 3        | 17     | 11     |          |
| chr6:109112925-109128100  | 15176     | 16   | 8    | 4          | 8     | 8     | 2  | 7      | 2     | 9    | 10    | 16       | 16     | 4      |          |
| chr3:16120050-16171700    | 51651     | 16   | 4    | 3          | 2     | 2     | 3  | 4      | 1     | 2    | 6     | 16       | 3      | 3      |          |
| chr2:224184075-224295925  | 111851    | 16   | 9    | 6          |       |       |    |        |       |      |       |          |        |        |          |

| location                  | span (nt) | hypothalam |      |         |       |       |    |        |       |      |       |    | skeletal muscle | spleen | testes | Comments |
|---------------------------|-----------|------------|------|---------|-------|-------|----|--------|-------|------|-------|----|-----------------|--------|--------|----------|
|                           |           | max        | mean | adipose | colon | heart | us | kidney | liver | lung | ovary |    |                 |        |        |          |
| chr9:33001575-33014725    | 13151     | 16         | 8    | 6       | 7     | 4     | 4  | 10     | 2     | 8    | 16    | 8  | 11              | 14     |        |          |
| chr4:26418775-26459200    | 40426     | 16         | 5    | 1       | 6     | 2     | 2  | 16     | 1     | 4    | 12    | 1  | 4               | 6      |        |          |
| chr4:972950-9746600       | 16651     | 16         | 2    | 0       | 0     | 0     | 0  | 1      | 0     | 0    | 1     | 0  | 1               | 16     |        |          |
| chr14:38898625-38914350   | 15726     | 16         | 5    | 1       | 4     | 3     | 1  | 16     | 3     | 4    | 6     | 4  | 9               | 4      |        |          |
| chr8:126604125-126708875  | 104751    | 16         | 8    | 4       | 9     | 5     | 4  | 16     | 8     | 10   | 12    | 4  | 9               | 10     |        |          |
| chr2:183481775-183495675  | 13901     | 15         | 8    | 3       | 5     | 8     | 5  | 9      | 3     | 13   | 14    | 15 | 6               | 6      |        |          |
| chr7:22860450-22876975    | 16526     | 15         | 5    | 3       | 5     | 5     | 1  | 2      | 3     | 7    | 7     | 15 | 8               | 4      |        |          |
| chr8:37377750-37470000    | 92251     | 15         | 8    | 6       | 10    | 5     | 4  | 9      | 2     | 6    | 12    | 4  | 15              | 11     |        |          |
| chr5:6882550-6906100      | 23551     | 15         | 7    | 4       | 2     | 4     | 8  | 12     | 6     | 8    | 5     | 4  | 15              | 7      |        |          |
| chr8:6508350-65774000     | 69051     | 15         | 7    | 5       | 10    | 4     | 3  | 9      | 3     | 6    | 10    | 3  | 9               | 15     |        |          |
| chr6:32970575-32980325    | 9751      | 15         | 4    | 1       | 2     | 3     | 4  | 3      | 1     | 5    | 4     | 2  | 15              | 5      |        |          |
| chr6:5830225-5909500      | 79276     | 15         | 9    | 6       | 13    | 5     | 4  | 10     | 3     | 9    | 15    | 4  | 12              | 12     |        |          |
| chrX:124289750-124417275  | 127526    | 15         | 8    | 5       | 8     | 6     | 6  | 9      | 3     | 9    | 15    | 3  | 10              | 9      |        |          |
| chr3:22263700-22385225    | 121526    | 15         | 4    | 3       | 4     | 1     | 3  | 3      | 2     | 4    | 7     | 2  | 5               | 15     |        |          |
| chr6:125271300-125315975  | 44676     | 15         | 6    | 3       | 5     | 3     | 3  | 4      | 1     | 7    | 10    | 15 | 4               | 6      |        |          |
| chr15:38123550-38145575   | 22026     | 15         | 11   | 7       | 14    | 12    | 11 | 13     | 2     | 9    | 15    | 11 | 15              | 14     |        |          |
| chr6:45632625-45776550    | 143926    | 15         | 8    | 5       | 11    | 4     | 4  | 8      | 2     | 13   | 13    | 3  | 15              | 11     |        |          |
| chr8:134678950-134886525  | 207576    | 15         | 9    | 7       | 15    | 6     | 6  | 9      | 3     | 11   | 14    | 6  | 13              | 10     |        |          |
| chr8:9636700-96483000     | 116301    | 15         | 8    | 3       | 9     | 4     | 3  | 13     | 2     | 10   | 15    | 6  | 14              | 10     |        |          |
| chr13:50430725-50449550   | 18826     | 15         | 5    | 3       | 3     | 3     | 2  | 4      | 1     | 6    | 10    | 2  | 15              | 5      |        |          |
| chr10:39116700-39194725   | 78026     | 15         | 3    | 1       | 15    | 1     | 1  | 1      | 0     | 0    | 1     | 0  | 2               | 7      |        |          |
| chr3:109306850-109354500  | 47651     | 15         | 2    | 1       | 2     | 1     | 1  | 1      | 0     | 1    | 1     | 1  | 15              | 1      |        |          |
| chr9:238650-254175        | 15526     | 15         | 4    | 4       | 3     | 2     | 2  | 5      | 1     | 9    | 1     | 1  | 15              | 3      |        |          |
| chr9:2768700-2781525      | 12826     | 15         | 7    | 3       | 6     | 4     | 7  | 14     | 2     | 6    | 15    | 7  | 7               | 4      |        |          |
| chr8:20314425-20440800    | 126376    | 15         | 5    | 2       | 6     | 3     | 2  | 6      | 2     | 15   | 4     | 2  | 4               | 6      |        |          |
| chr1:230326450-230420025  | 93576     | 15         | 5    | 5       | 5     | 3     | 4  | 4      | 6     | 15   | 6     | 2  | 4               | 7      |        |          |
| chr14:47751025-47801225   | 50201     | 15         | 4    | 2       | 3     | 1     | 3  | 6      | 1     | 3    | 15    | 2  | 4               | 4      |        |          |
| chr6:4958950-5001875      | 42926     | 15         | 8    | 6       | 8     | 5     | 6  | 10     | 5     | 9    | 11    | 4  | 15              | 9      |        |          |
| chr3:111683075-111833475  | 150401    | 15         | 7    | 5       | 8     | 4     | 4  | 8      | 2     | 7    | 15    | 5  | 11              | 11     |        |          |
| chr2:238197525-238231375  | 33851     | 15         | 7    | 4       | 5     | 9     | 3  | 10     | 2     | 8    | 10    | 12 | 15              | 3      |        |          |
| chr8:96157275-96189075    | 31801     | 14         | 8    | 7       | 14    | 7     | 12 | 5      | 6     | 14   | 6     | 4  | 8               | 6      |        |          |
| chr12:30619850-30648175   | 28326     | 14         | 6    | 3       | 6     | 4     | 3  | 7      | 2     | 4    | 14    | 6  | 7               | 7      |        |          |
| chr13:90799275-90818300   | 19026     | 14         | 5    | 1       | 2     | 2     | 1  | 4      | 6     | 3    | 13    | 1  | 14              | 3      |        |          |
| chr2:42909150-43019900    | 110751    | 14         | 8    | 5       | 10    | 6     | 4  | 8      | 2     | 9    | 14    | 3  | 12              | 9      |        |          |
| chr7:37994575-38045650    | 51076     | 14         | 6    | 3       | 4     | 2     | 14 | 7      | 2     | 7    | 11    | 2  | 5               | 6      |        |          |
| chr2:111158925-111171375  | 12451     | 14         | 2    | 0       | 1     | 0     | 0  | 1      | 0     | 1    | 1     | 0  | 1               | 14     |        |          |
| chr8:135395125-135545175  | 150051    | 14         | 7    | 5       | 9     | 4     | 3  | 10     | 2     | 7    | 8     | 4  | 14              | 8      |        |          |
| chr2:218303850-218326725  | 22876     | 14         | 7    | 14      | 13    | 9     | 2  | 12     | 1     | 6    | 5     | 2  | 7               | 4      |        |          |
| chr10:122712875-122729225 | 16351     | 14         | 2    | 1       | 1     | 0     | 0  | 1      | 0     | 14   | 1     | 0  | 0               | 1      |        |          |
| chr7:26409925-26454600    | 44676     | 14         | 5    | 3       | 3     | 1     | 2  | 9      | 0     | 3    | 8     | 3  | 6               | 14     |        |          |
| chr3:179314975-179522075  | 207101    | 14         | 8    | 5       | 9     | 6     | 6  | 10     | 1     | 11   | 14    | 4  | 10              | 11     |        |          |
| chr18:3082250-30849925    | 27676     | 14         | 3    | 1       | 5     | 1     | 7  | 2      | 1     | 2    | 2     | 14 | 2               | 1      |        |          |
| chr10:28852675-28860875   | 8001      | 14         | 9    | 8       | 3     | 11    | 12 | 13     | 5     | 7    | 14    | 5  | 14              | 10     |        |          |
| chr6:130618000-130674625  | 56626     | 14         | 5    | 3       | 4     | 2     | 2  | 4      | 3     | 9    | 14    | 1  | 6               | 4      |        |          |
| chr3:18261750-18340875    | 79126     | 14         | 4    | 2       | 3     | 2     | 2  | 3      | 3     | 14   | 3     | 1  | 3               | 6      |        |          |
| chr2:152335500-152361525  | 26026     | 14         | 7    | 3       | 6     | 6     | 3  | 9      | 2     | 11   | 13    | 9  | 14              | 6      |        |          |
| chr7:1720775-17298625     | 90851     | 14         | 7    | 5       | 10    | 4     | 4  | 8      | 4     | 8    | 14    | 4  | 11              | 9      |        |          |
| chr7:112534500-112586075  | 51576     | 14         | 5    | 3       | 2     | 12    | 3  | 14     | 3     | 4    | 3     | 4  | 6               | 4      |        |          |
| chr3:31215650-31350275    | 134626    | 14         | 4    | 2       | 5     | 2     | 2  | 5      | 1     | 6    | 14    | 2  | 4               | 6      |        |          |
| chr7:81280875-81388725    | 107851    | 14         | 8    | 5       | 9     | 4     | 4  | 13     | 2     | 7    | 14    | 5  | 10              | 10     |        |          |
| chr12:122180525-122199700 | 19176     | 14         | 4    | 1       | 6     | 2     | 1  | 6      | 1     | 4    | 14    | 1  | 3               | 3      |        |          |
| chrX:63958875-64010675    | 51801     | 14         | 7    | 4       | 6     | 5     | 4  | 11     | 4     | 10   | 14    | 6  | 10              | 6      |        |          |
| chr8:132833800-132925750  | 91951     | 14         | 8    | 7       | 8     | 5     | 5  | 10     | 3     | 9    | 14    | 6  | 14              | 11     |        |          |
| chr12:123133225-123150050 | 16826     | 14         | 4    | 2       | 14    | 1     | 6  | 6      | 0     | 3    | 4     | 1  | 3               | 3      |        |          |
| chr14:58952300-58981800   | 29501     | 14         | 7    | 6       | 5     | 8     | 5  | 11     | 2     | 4    | 14    | 11 | 6               | 6      |        |          |
| chr5:115676975-115691975  | 15001     | 14         | 6    | 2       | 2     | 3     | 1  | 8      | 2     | 5    | 14    | 7  | 11              | 6      |        |          |
| chr8:142343125-142385200  | 42076     | 14         | 7    | 6       | 11    | 4     | 3  | 11     | 0     | 14   | 10    | 2  | 6               | 11     |        |          |
| chr2:168054925-168131600  | 76676     | 14         | 8    | 4       | 14    | 5     | 8  | 7      | 2     | 8    | 13    | 6  | 11              | 13     |        |          |
| chr14:55845175-55901650   | 56476     | 14         | 6    | 4       | 5     | 3     | 1  | 13     | 1     | 7    | 14    | 2  | 13              | 5      |        |          |
| chr11:27140600-27204675   | 64076     | 14         | 7    | 4       | 8     | 5     | 4  | 14     | 2     | 5    | 10    | 5  | 12              | 9      |        |          |
| chr8:96058825-96075650    | 16826     | 14         | 7    | 4       | 5     | 3     | 4  | 4      | 5     | 14   | 12    | 8  | 11              | 11     |        |          |
| chr5:85778600-85902825    | 124226    | 14         | 9    | 5       | 11    | 5     | 5  | 12     | 4     | 8    | 14    | 5  | 12              | 14     |        |          |
| chr13:40963250-41020000   | 56751     | 14         | 5    | 3       | 7     | 2     | 3  | 6      | 1     | 5    | 14    | 4  | 5               | 5      |        |          |
| chr11:87745400-87779800   | 34401     | 14         | 6    | 4       | 6     | 4     | 3  | 8      | 1     | 8    | 14    | 3  | 13              | 7      |        |          |
| chr6:82479050-82494400    | 15351     | 14         | 4    | 1       | 1     | 5     | 1  | 3      | 2     | 5    | 14    | 2  | 6               | 4      |        |          |
| chr15:60516650-60535375   | 18726     | 14         | 5    | 14      | 7     | 3     | 4  | 6      | 0     | 1    | 8     | 2  | 4               | 3      |        |          |
| chr3:4205450-4228475      | 23026     | 14         | 6    | 3       | 2     | 4     | 2  | 7      | 2     | 6    | 12    | 5  | 11              | 14     |        |          |
| chr2:204328625-204374375  | 45751     | 14         | 7    | 5       | 9     | 6     | 6  | 6      | 7     | 6    | 14    | 4  | 11              | 7      |        |          |
| chr1:223490025-223552350  | 62326     | 14         | 6    | 3       | 6     | 4     | 3  | 10     | 2     | 7    | 14    | 2  | 5               | 13     |        |          |
| chr19:52805475-52829480   | 24006     | 14         | 6    | 3       | 14    | 4     | 3  | 7      | 2     | 7    | 7     | 5  | 10              | 5      |        |          |
| chr3:13058200-130572550   | 14351     | 14         | 6    | 3       | 8     | 4     | 8  | 5      | 1     | 5    | 14    | 3  | 10              | 5      |        |          |
| chr3:189028725-189090525  | 61801     | 14         | 7    | 5       | 8     | 5     | 5  | 11     | 2     | 8    | 14    | 6  | 10              | 9      |        |          |
| chr2:237508075-237634675  | 126601    | 14         | 6    | 5       | 6     | 4     | 3  | 9      | 3     | 6    | 14    | 4  | 6               | 8      |        |          |
| chr14:91291375-91306825   | 15451     | 14         | 5    | 1       | 6     | 6     | 1  | 6      | 1     | 14   | 4     | 1  | 10              | 5      |        |          |
| chr7:41824675-41897575    | 72901     | 14         | 3    | 2       | 2     | 1     | 2  | 2      | 4     | 14   | 2     | 1  | 5               | 4      |        |          |
| chr2:47401150-47424250    | 23101     | 14         | 5    | 2       | 13    | 2     | 14 | 5      | 1     | 3    | 7     | 1  | 5               | 4      |        |          |
| chr1:141594750-141606925  | 10176     | 14         | 6    | 4       | 7     | 4     | 2  | 4      | 3     | 14   | 3     | 12 | 9               | 8      |        |          |
| chr12:14272950-14321775   | 48826     | 14         | 7    | 4       | 9     | 5     | 5  | 9      | 2     | 4    | 14    | 3  | 8               | 10     |        |          |
| chr16:13349700-13364025   | 14326     | 14         | 3    | 3       | 2     | 1     | 3  | 3      | 4     | 2    | 14    | 1  | 3               | 2      |        |          |
| chr1:171137475-171174300  | 36826     | 13         | 4    | 2       | 2     | 2     | 1  | 13     | 0     | 8    | 4     | 1  | 4               | 3      |        |          |
| chr6:3582800-3664950      | 82151     | 13         | 8    | 4       | 9     | 6     | 13 | 8      | 2     | 10   | 12    | 5  | 10              | 13     |        |          |
| chr1:73192025-73234050    | 42026     | 13         | 6    | 3       | 7     | 4     | 4  | 9      | 1     | 6    | 13    | 4  | 10              | 8      |        |          |
| chr1:18208125-18299975    | 91851     | 13         | 7    | 3       | 10    | 5     | 2  | 8      | 3     | 8    | 9     | 3  | 9               | 13     |        |          |
| chr5:57279250-57389025    | 109776    | 13         | 7    | 4       | 9     | 4     | 4  | 13     | 3     | 8    | 13    | 4  | 10              | 9      |        |          |
| chr9:23587225-23674450    | 87226     | 13         | 4    | 1       | 4     | 5     | 5  | 5      | 1     | 3    | 6     | 1  | 3               | 13     |        |          |
| chr3:153267725-153412750  | 145026    | 13         | 7    | 5       | 10    | 4     | 3  | 6      | 2     | 10   | 8     | 5  | 13              | 9      |        |          |
| chr13:29122375-29189475   | 67101     | 13         | 6    | 3       | 13    | 3     | 2  | 6      | 5     | 4    | 13    | 3  | 11              | 6      |        |          |
| chr13:47278600-47390025   | 111426    | 13         | 10   | 13      | 10    | 6     | 5  | 13     | 5     | 10   | 12    | 10 | 13              | 13     |        |          |
| chr12:8827125-88284300    | 12176     | 13         | 6    | 6       | 6     | 6     | 4  | 13     | 1     | 6    | 9     | 2  | 11              | 5      |        |          |
| chr1:142295250-142311025  | 15776     | 13         | 7    | 5       | 10    | 5     | 7  | 6      | 3     | 4    | 13    | 2  | 8               | 13     |        |          |
| chr5:29549850-29625000    | 75151     | 13         | 6    | 4       | 6     | 4     | 2  | 2      | 6     | 2    | 7     | 13 | 4               | 8      |        |          |
| chr21:25856650-25874075   | 17426     | 13         | 4    | 2       | 2     | 2     | 2  | 2      | 0     | 5    | 6     | 2  | 13              | 5      |        |          |
| chr7:77116150-77141875    | 25726     | 13         | 5    | 2       | 7     | 4     | 2  | 6      | 2     | 6    | 7     | 5  | 13              | 3      |        |          |
| chr14:49552850-49579050   | 26201     | 13         | 3    | 1       | 4     | 1     | 1  | 2      | 1     | 8    | 1     | 1  | 13              | 3      |        |          |
| chr9:127876000-127959875  | 83876     | 13         | 7    | 3       | 9     | 4     | 4  | 10     | 2     | 8    | 13    | 4  | 8               | 8      |        |          |
| chr15:62540775-62558475   | 17701     | 13         | 6    | 3       | 9     | 4     | 2  | 8      | 1     | 7    | 12    | 2  | 13              | 5      |        |          |
| chr3:4343750-4357600      | 13851     | 13         | 6    | 5       | 7     | 4     | 5  | 9      | 2     | 6    | 10    | 4  | 13              | 5      |        |          |
| chr13:48083800-48168625   | 84826     | 13         | 7    | 3       | 9     | 6     | 3  | 8      | 2     | 9    | 13    | 3  | 12              | 6      |        |          |
| chr4:68258750-68278525    | 19776     | 13         | 7    | 4       | 3     | 7     | 6  | 13     | 6     | 3    | 10    | 4  | 11              | 6      |        |          |
| chr3:190140525-190153400  | 12876     | 13         | 3    | 7       |       |       |    |        |       |      |       |    |                 |        |        |          |

| location                  | span (nt) | hypothalam |      |         |       |       |    |        |       |      |       |    | skeletal muscle | spleen | testes | Comments |      |
|---------------------------|-----------|------------|------|---------|-------|-------|----|--------|-------|------|-------|----|-----------------|--------|--------|----------|------|
|                           |           | max        | mean | adipose | colon | heart | us | kidney | liver | lung | ovary |    |                 |        |        |          |      |
| chr1:22450050-22467875    | 17826     | 12         | 3    | 1       | 4     | 1     | 1  | 1      | 12    | 2    | 2     | 1  | 1               | 1      | 1      | 1        | 1    |
| chr1:9129450-9164075      | 34626     | 12         | 7    | 10      | 8     | 5     | 3  | 4      | 1     | 12   | 12    | 4  | 6               | 11     | 4      | 11       | 4    |
| chr8:110241350-110293300  | 51951     | 12         | 5    | 1       | 3     | 5     | 2  | 5      | 1     | 6    | 9     | 10 | 12              | 4      | 4      | 7        | 8    |
| chr3:67820975-67872650    | 51676     | 12         | 6    | 4       | 7     | 4     | 2  | 12     | 6     | 5    | 12    | 3  | 6               | 8      | 7      | 8        | 7    |
| chr1:245000875-245012875  | 12001     | 12         | 6    | 4       | 8     | 3     | 5  | 7      | 3     | 2    | 12    | 4  | 3               | 7      | 8      | 7        | 7    |
| chr9:32926300-32939200    | 12901     | 12         | 3    | 2       | 1     | 1     | 2  | 12     | 4     | 1    | 3     | 1  | 3               | 2      | 3      | 2        | 2    |
| chr13:72807725-72937000   | 129276    | 12         | 6    | 3       | 12    | 3     | 3  | 6      | 2     | 6    | 10    | 2  | 8               | 7      | 8      | 7        | 7    |
| chr6:126028200-126084725  | 56526     | 12         | 6    | 3       | 4     | 3     | 3  | 10     | 2     | 7    | 9     | 4  | 12              | 6      | 6      | 6        | 6    |
| chr8:130092325-130220700  | 128376    | 12         | 6    | 4       | 8     | 2     | 3  | 6      | 5     | 12   | 8     | 2  | 12              | 7      | 7      | 7        | 7    |
| chr13:79335200-79412750   | 77551     | 12         | 7    | 6       | 6     | 4     | 4  | 7      | 2     | 6    | 12    | 6  | 9               | 9      | 9      | 9        | 9    |
| chr2:121545350-12161175   | 73826     | 12         | 6    | 6       | 10    | 4     | 7  | 6      | 2     | 6    | 12    | 4  | 6               | 6      | 6      | 6        | 6    |
| chr2:192461425-192508825  | 47401     | 12         | 5    | 2       | 5     | 6     | 2  | 3      | 1     | 9    | 12    | 1  | 4               | 5      | 5      | 5        | 5    |
| chr4:4962125-5022325      | 60201     | 12         | 7    | 5       | 10    | 4     | 4  | 7      | 4     | 12   | 10    | 3  | 9               | 11     | 11     | 11       | 11   |
| chr8:79929700-79960525    | 30826     | 12         | 5    | 2       | 4     | 2     | 2  | 9      | 4     | 12   | 4     | 1  | 12              | 5      | 5      | 5        | 5    |
| chr13:50544475-50665475   | 121001    | 12         | 6    | 4       | 7     | 3     | 4  | 8      | 2     | 7    | 9     | 5  | 10              | 12     | 12     | 12       | 12   |
| chr12:50511350-50526675   | 15326     | 12         | 2    | 0       | 1     | 1     | 0  | 12     | 0     | 2    | 1     | 0  | 1               | 1      | 1      | 1        | 1    |
| chr13:49455650-49466250   | 10601     | 12         | 5    | 3       | 4     | 3     | 2  | 3      | 0     | 5    | 5     | 12 | 11              | 5      | 5      | 5        | 5    |
| chr18:52870875-52909150   | 38276     | 12         | 7    | 4       | 8     | 5     | 4  | 9      | 2     | 8    | 12    | 4  | 8               | 9      | 9      | 9        | 9    |
| chr17:2137950-21390575    | 16626     | 12         | 4    | 2       | 3     | 4     | 12 | 2      | 3     | 2    | 4     | 2  | 4               | 4      | 4      | 4        | 4    |
| chr3:37839075-37851625    | 12551     | 12         | 5    | 2       | 3     | 7     | 1  | 5      | 2     | 2    | 10    | 2  | 12              | 4      | 4      | 4        | 4    |
| chr18:37312775-37462750   | 149976    | 12         | 6    | 3       | 12    | 4     | 5  | 4      | 4     | 5    | 11    | 2  | 5               | 7      | 7      | 7        | 7    |
| chr4:109327675-10945425   | 127751    | 12         | 6    | 4       | 8     | 2     | 3  | 7      | 1     | 5    | 8     | 3  | 12              | 12     | 12     | 12       | 12   |
| chr12:111269000-111299725 | 30726     | 12         | 6    | 2       | 12    | 5     | 3  | 8      | 2     | 9    | 10    | 2  | 9               | 8      | 8      | 8        | 8    |
| chr19:35205200-35223675   | 18476     | 12         | 5    | 2       | 3     | 2     | 5  | 6      | 2     | 3    | 12    | 5  | 10              | 5      | 5      | 5        | 5    |
| chr1:199858800-199883250  | 24451     | 12         | 5    | 11      | 11    | 5     | 7  | 2      | 1     | 12   | 2     | 2  | 4               | 3      | 3      | 3        | 3    |
| chr3:139242175-139254800  | 12626     | 12         | 4    | 3       | 3     | 2     | 1  | 6      | 0     | 4    | 12    | 1  | 5               | 2      | 2      | 2        | 2    |
| chr13:53710800-53826900   | 116101    | 12         | 5    | 3       | 4     | 4     | 3  | 7      | 2     | 5    | 12    | 3  | 7               | 7      | 7      | 7        | 7    |
| chr2:19091050-19143450    | 52401     | 12         | 7    | 5       | 5     | 4     | 3  | 12     | 3     | 8    | 11    | 6  | 8               | 8      | 8      | 8        | 8    |
| chr5:95329600-95376075    | 46476     | 12         | 5    | 4       | 4     | 3     | 2  | 6      | 3     | 10   | 12    | 3  | 6               | 7      | 7      | 7        | 7    |
| chr4:9413775-9428250      | 14476     | 12         | 2    | 1       | 1     | 1     | 0  | 12     | 1     | 1    | 1     | 0  | 2               | 1      | 1      | 1        | 1    |
| chr12:45538425-45587250   | 48826     | 12         | 5    | 2       | 3     | 3     | 3  | 10     | 1     | 4    | 12    | 11 | 4               | 7      | 7      | 7        | 7    |
| chr14:96479600-96696875   | 217276    | 12         | 7    | 5       | 12    | 4     | 5  | 7      | 2     | 10   | 9     | 2  | 10              | 8      | 8      | 8        | 8    |
| chr3:180146275-180207400  | 61126     | 12         | 6    | 5       | 5     | 5     | 5  | 7      | 5     | 6    | 4     | 4  | 12              | 6      | 6      | 6        | 6    |
| chr1:113341575-113352750  | 11176     | 12         | 4    | 2       | 4     | 3     | 2  | 2      | 1     | 2    | 12    | 4  | 5               | 3      | 3      | 3        | 3    |
| chr12:46324075-46343100   | 19026     | 12         | 5    | 2       | 3     | 3     | 5  | 4      | 2     | 2    | 12    | 5  | 8               | 6      | 6      | 6        | 6    |
| chr19:21811825-21825825   | 14001     | 12         | 5    | 2       | 8     | 3     | 2  | 5      | 1     | 5    | 12    | 1  | 11              | 5      | 5      | 5        | 5    |
| chr13:75944675-76053050   | 108376    | 12         | 6    | 5       | 6     | 4     | 3  | 5      | 4     | 11   | 10    | 3  | 6               | 12     | 12     | 12       | 12   |
| chr8:90285550-90313750    | 28201     | 12         | 6    | 3       | 6     | 4     | 4  | 9      | 1     | 4    | 12    | 4  | 7               | 7      | 7      | 7        | 7    |
| chr13:37380475-37450700   | 70226     | 12         | 5    | 3       | 5     | 5     | 2  | 12     | 2     | 5    | 11    | 2  | 7               | 6      | 6      | 6        | 6    |
| chr2:218521300-218534150  | 12851     | 12         | 3    | 5       | 5     | 2     | 0  | 2      | 0     | 2    | 12    | 1  | 2               | 2      | 2      | 2        | 2    |
| chr6:141206225-141265250  | 59026     | 12         | 7    | 12      | 8     | 8     | 3  | 6      | 2     | 10   | 9     | 4  | 10              | 9      | 9      | 9        | 9    |
| chr8:103307650-103425850  | 118201    | 12         | 7    | 6       | 8     | 5     | 3  | 9      | 2     | 7    | 12    | 5  | 11              | 9      | 9      | 9        | 9    |
| chr8:83217050-833169250   | 99876     | 11         | 6    | 3       | 9     | 4     | 3  | 6      | 2     | 6    | 9     | 4  | 8               | 11     | 11     | 11       | 11   |
| chr17:34952406-34983927   | 31432     | 11         | 7    | 5       | 9     | 4     | 3  | 10     | 3     | 8    | 11    | 5  | 11              | 8      | 8      | 8        | 8    |
| chr6:16732425-167255350   | 22926     | 11         | 3    | 1       | 2     | 1     | 2  | 1      | 0     | 4    | 3     | 0  | 9               | 11     | 11     | 11       | 11   |
| chr1:105438075-105481400  | 43326     | 11         | 3    | 1       | 2     | 1     | 1  | 2      | 3     | 11   | 2     | 1  | 2               | 3      | 3      | 3        | 3    |
| chr12:84499575-84625775   | 126201    | 11         | 5    | 2       | 6     | 3     | 3  | 5      | 3     | 6    | 6     | 2  | 5               | 11     | 11     | 11       | 11   |
| chr14:84031800-84050525   | 18726     | 11         | 6    | 3       | 7     | 4     | 6  | 11     | 1     | 9    | 11    | 3  | 6               | 8      | 8      | 8        | 8    |
| chr2:101190700-101222900  | 32201     | 11         | 5    | 2       | 4     | 3     | 1  | 6      | 1     | 3    | 11    | 4  | 11              | 4      | 4      | 4        | 4    |
| chr2:73789225-73801625    | 12401     | 11         | 2    | 0       | 1     | 0     | 1  | 5      | 0     | 1    | 4     | 0  | 11              | 2      | 2      | 2        | 2    |
| chr12:3767950-3783200     | 15251     | 11         | 4    | 2       | 2     | 2     | 3  | 3      | 1     | 3    | 11    | 2  | 10              | 3      | 3      | 3        | 3    |
| chr2:105547175-105636100  | 88926     | 11         | 3    | 2       | 4     | 2     | 1  | 3      | 4     | 11   | 2     | 1  | 2               | 6      | 6      | 6        | 6    |
| chr6:155257875-155278175  | 20301     | 11         | 6    | 3       | 7     | 5     | 2  | 5      | 1     | 5    | 11    | 7  | 11              | 5      | 5      | 5        | 5    |
| chr5:74363725-74384025    | 20301     | 11         | 5    | 2       | 6     | 2     | 3  | 9      | 1     | 5    | 11    | 1  | 8               | 7      | 7      | 7        | 7    |
| chrX:49575900-49588600    | 12701     | 11         | 3    | 1       | 3     | 1     | 1  | 11     | 1     | 2    | 7     | 1  | 3               | 3      | 3      | 3        | 3    |
| chr1:196813275-196869300  | 56026     | 11         | 3    | 1       | 1     | 1     | 1  | 4      | 2     | 11   | 2     | 0  | 3               | 5      | 5      | 5        | 5    |
| chr4:82382450-82416400    | 33951     | 11         | 3    | 2       | 11    | 1     | 1  | 2      | 6     | 7    | 1     | 1  | 1               | 2      | 2      | 2        | 2    |
| chr7:10533950-105351950   | 18001     | 11         | 4    | 6       | 8     | 1     | 6  | 11     | 1     | 1    | 5     | 1  | 4               | 4      | 4      | 4        | 4    |
| chr21:43576100-43643725   | 67626     | 11         | 4    | 2       | 6     | 3     | 3  | 5      | 0     | 3    | 5     | 2  | 11              | 2      | 2      | 2        | 2    |
| chr3:152871900-152886900  | 15001     | 11         | 3    | 2       | 3     | 2     | 1  | 2      | 3     | 11   | 2     | 1  | 2               | 4      | 4      | 4        | 4    |
| chr3:59325725-59437400    | 111676    | 11         | 7    | 5       | 9     | 5     | 4  | 9      | 2     | 5    | 11    | 5  | 9               | 9      | 9      | 9        | 9    |
| chr15:39365175-39377125   | 11951     | 11         | 7    | 5       | 10    | 4     | 3  | 10     | 4     | 10   | 11    | 5  | 11              | 5      | 5      | 5        | 5    |
| chr14:87558425-87570400   | 11976     | 11         | 3    | 1       | 1     | 1     | 1  | 2      | 11    | 4    | 2     | 1  | 6               | 2      | 2      | 2        | 2    |
| chr17:15326100-15332950   | 6851      | 11         | 4    | 2       | 8     | 2     | 3  | 4      | 1     | 3    | 11    | 1  | 5               | 2      | 2      | 2        | 2    |
| chr6:41475450-4157700     | 102251    | 11         | 5    | 3       | 11    | 3     | 4  | 4      | 2     | 6    | 7     | 2  | 5               | 7      | 7      | 7        | 7    |
| chr12:59462625-59500450   | 37826     | 11         | 6    | 4       | 6     | 4     | 4  | 7      | 1     | 6    | 11    | 3  | 7               | 10     | 10     | 10       | 10   |
| chr1:66644600-66679850    | 35251     | 11         | 5    | 3       | 5     | 4     | 2  | 6      | 3     | 5    | 11    | 5  | 7               | 6      | 6      | 6        | 6    |
| chr4:125047300-125156250  | 108951    | 11         | 2    | 0       | 3     | 7     | 11 | 2      | 7     | 1    | 5     | 8  | 7               | 5      | 5      | 5        | 5    |
| chr4:5953425-5987275      | 33851     | 11         | 6    | 2       | 0     | 1     | 0  | 11     | 1     | 0    | 1     | 0  | 2               | 1      | 1      | 1        | 1    |
| chr1:72768625-72851975    | 83351     | 11         | 4    | 2       | 3     | 2     | 3  | 3      | 2     | 8    | 11    | 1  | 2               | 4      | 4      | 4        | 4    |
| chr2:158279100-158295500  | 16401     | 11         | 4    | 1       | 3     | 3     | 1  | 11     | 1     | 2    | 6     | 5  | 3               | 3      | 3      | 3        | 3    |
| chr2:14711200-14767900    | 56701     | 11         | 3    | 2       | 2     | 1     | 1  | 2      | 2     | 11   | 3     | 0  | 2               | 3      | 3      | 3        | 3    |
| chr10:54913075-54953825   | 40751     | 11         | 6    | 3       | 7     | 4     | 4  | 9      | 1     | 7    | 11    | 3  | 9               | 8      | 8      | 8        | 8    |
| chr8:142095575-142171400  | 75826     | 11         | 3    | 2       | 6     | 2     | 1  | 3      | 2     | 11   | 4     | 1  | 3               | 3      | 3      | 3        | 3    |
| chr11:2404925-2415425     | 10501     | 11         | 2    | 0       | 11    | 0     | 0  | 3      | 0     | 1    | 0     | 0  | 2               | 2      | 2      | 2        | 2    |
| chr12:129625700-129695450 | 69751     | 11         | 5    | 1       | 9     | 2     | 9  | 9      | 1     | 3    | 11    | 1  | 3               | 5      | 5      | 5        | 5    |
| chr6:57029975-57042500    | 12526     | 11         | 4    | 1       | 3     | 2     | 4  | 3      | 1     | 3    | 11    | 2  | 7               | 4      | 4      | 4        | 4    |
| chr6:16616675-166177900   | 11126     | 11         | 2    | 0       | 1     | 1     | 2  | 8      | 0     | 0    | 11    | 0  | 0               | 4      | 4      | 4        | 4    |
| chr1:226324900-22633050   | 10151     | 11         | 3    | 1       | 3     | 2     | 1  | 2      | 0     | 2    | 11    | 1  | 6               | 3      | 3      | 3        | 3    |
| chr5:68020875-68039900    | 19026     | 11         | 6    | 4       | 7     | 2     | 3  | 6      | 5     | 5    | 11    | 4  | 7               | 7      | 7      | 7        | 7    |
| chr6:81204400-81225475    | 21076     | 11         | 4    | 2       | 4     | 1     | 2  | 8      | 2     | 3    | 11    | 2  | 3               | 4      | 4      | 4        | 4    |
| chr8:72732550-72834350    | 101801    | 11         | 6    | 4       | 8     | 4     | 4  | 8      | 2     | 7    | 11    | 3  | 9               | 9      | 9      | 9        | 9    |
| chr13:13609400-13639400   | 90001     | 11         | 4    | 2       | 3     | 2     | 3  | 7      | 1     | 6    | 7     | 2  | 11              | 4      | 4      | 4        | 4    |
| chr21:34226200-34287850   | 61651     | 11         | 6    | 2       | 10    | 4     | 2  | 11     | 3     | 9    | 7     | 6  | 10              | 5      | 5      | 5        | 5    |
| chr7:63682825-63758200    | 75376     | 10         | 6    | 2       | 8     | 3     | 4  | 5      | 2     | 10   | 10    | 2  | 7               | 10     | 10     | 10       | 10   |
| chr16:53502500-53520209   | 17710     | 10         | 4    | 5       | 0     | 6     | 2  | 4      | 1     | 8    | 6     | 2  | 1               | 10     | 10     | 10       | 10   |
| chr8:70066100-70122500    | 56401     | 10         | 6    | 5       | 7     | 5     | 3  | 7      | 3     | 5    | 10    | 4  | 9               | 10     | 10     | 10       | 10</ |



| location                  | span (nt) | hypothalam |      |         |       |       |    |        |       |      |       | skeletal muscle | spleen | testes | Comments |
|---------------------------|-----------|------------|------|---------|-------|-------|----|--------|-------|------|-------|-----------------|--------|--------|----------|
|                           |           | max        | mean | adipose | colon | heart | us | kidney | liver | lung | ovary |                 |        |        |          |
| chr6:126461350-126482675  | 21326     | 10         | 4    | 1       | 2     | 2     | 1  | 9      | 4     | 2    | 10    | 5               | 4      | 4      |          |
| chr7:155386625-155451325  | 64701     | 10         | 3    | 1       | 4     | 1     | 1  | 10     | 1     | 2    | 3     | 1               | 2      | 2      |          |
| chr14:22834350-22839975   | 5626      | 10         | 4    | 2       | 1     | 2     | 4  | 3      | 2     | 10   | 4     | 5               | 5      | 4      |          |
| chr7:20477725-20548875    | 71151     | 10         | 5    | 3       | 3     | 3     | 2  | 4      | 4     | 10   | 7     | 3               | 6      | 8      |          |
| chr8:124540800-124568875  | 28076     | 10         | 5    | 1       | 5     | 4     | 3  | 6      | 3     | 7    | 10    | 4               | 9      | 4      |          |
| chr16:25178750-25189800   | 11051     | 10         | 4    | 1       | 6     | 2     | 1  | 3      | 0     | 1    | 10    | 2               | 8      | 4      |          |
| chr3:37861975-37876925    | 14951     | 10         | 3    | 1       | 6     | 1     | 2  | 7      | 0     | 2    | 10    | 0               | 3      | 3      |          |
| chr4:53376500-53401675    | 25176     | 10         | 5    | 2       | 5     | 3     | 3  | 5      | 1     | 4    | 10    | 4               | 7      | 6      |          |
| chr6:84732350-84748000    | 15651     | 10         | 3    | 1       | 1     | 2     | 1  | 2      | 2     | 4    | 2     | 3               | 10     | 3      |          |
| chr1:35059475-35091575    | 33101     | 10         | 7    | 5       | 10    | 5     | 4  | 7      | 4     | 8    | 9     | 5               | 9      | 7      |          |
| chr5:94014600-94029225    | 14626     | 10         | 4    | 2       | 2     | 3     | 2  | 3      | 2     | 3    | 10    | 3               | 2      | 10     |          |
| chr5:127435825-127445650  | 9826      | 10         | 4    | 2       | 3     | 2     | 2  | 5      | 1     | 3    | 6     | 10              | 1      | 7      | 4        |
| chr2:177947475-177965575  | 18101     | 10         | 4    | 4       | 2     | 4     | 2  | 7      | 1     | 3    | 6     | 2               | 10     | 8      |          |
| chr1:191884000-191929100  | 45101     | 10         | 3    | 1       | 3     | 1     | 0  | 2      | 10    | 3    | 6     | 1               | 5      | 2      |          |
| chr20:971000-1032775      | 61776     | 10         | 5    | 4       | 5     | 2     | 2  | 10     | 2     | 4    | 9     | 1               | 6      | 8      |          |
| chr4:26657100-26713550    | 56451     | 9          | 5    | 4       | 9     | 3     | 3  | 5      | 1     | 7    | 7     | 2               | 9      | 5      |          |
| chr2:122483375-122493675  | 10301     | 9          | 4    | 2       | 5     | 2     | 1  | 4      | 0     | 4    | 9     | 2               | 6      | 7      |          |
| chr13:30254825-30309675   | 54851     | 9          | 3    | 2       | 3     | 2     | 1  | 1      | 0     | 6    | 2     | 1               | 9      | 2      |          |
| chr3:160049375-160087675  | 38301     | 9          | 7    | 4       | 6     | 9     | 3  | 6      | 1     | 7    | 9     | 9               | 9      | 9      |          |
| chr8:551925-588750        | 36826     | 9          | 4    | 3       | 4     | 2     | 1  | 6      | 1     | 4    | 5     | 1               | 9      | 6      |          |
| chr8:110304925-110316200  | 11276     | 9          | 4    | 1       | 1     | 4     | 2  | 4      | 2     | 3    | 7     | 6               | 9      | 3      |          |
| chr1:227077300-227144400  | 67101     | 9          | 3    | 2       | 3     | 2     | 2  | 2      | 1     | 9    | 4     | 1               | 5      | 3      |          |
| chr2:191748300-191787275  | 38976     | 9          | 4    | 3       | 3     | 2     | 1  | 3      | 3     | 9    | 7     | 1               | 6      | 4      |          |
| chr2:23485150-23511825    | 26676     | 9          | 5    | 5       | 9     | 3     | 2  | 6      | 1     | 6    | 8     | 4               | 8      | 3      |          |
| chr1:1117173700-111785525 | 11826     | 9          | 2    | 1       | 2     | 0     | 0  | 6      | 0     | 1    | 9     | 0               | 2      | 2      |          |
| chr11:129074200-129114425 | 40226     | 9          | 5    | 3       | 7     | 2     | 2  | 6      | 1     | 4    | 8     | 3               | 7      | 9      |          |
| chr5:1759400-1776250      | 16851     | 9          | 5    | 3       | 7     | 3     | 1  | 5      | 1     | 4    | 9     | 3               | 6      | 9      |          |
| chr18:40517050-40532650   | 15601     | 9          | 4    | 2       | 5     | 2     | 2  | 9      | 1     | 4    | 7     | 2               | 9      | 3      |          |
| chr1:48285375-48309925    | 24551     | 9          | 1    | 0       | 1     | 0     | 0  | 9      | 0     | 0    | 0     | 0               | 0      | 1      |          |
| chr8:20871025-20973775    | 102751    | 9          | 4    | 3       | 3     | 2     | 3  | 2      | 5     | 9    | 3     | 1               | 3      | 5      |          |
| chr14:45824500-45861375   | 36876     | 9          | 2    | 1       | 2     | 1     | 1  | 9      | 0     | 1    | 2     | 1               | 2      | 1      |          |
| chr2:155952550-156008475  | 55926     | 9          | 4    | 2       | 4     | 2     | 1  | 3      | 2     | 5    | 5     | 1               | 5      | 9      |          |
| chr3:88191225-88208250    | 17026     | 9          | 5    | 3       | 3     | 3     | 1  | 5      | 1     | 9    | 9     | 2               | 9      | 7      |          |
| chr6:1395175-1499250      | 104076    | 9          | 5    | 5       | 5     | 4     | 4  | 4      | 3     | 6    | 9     | 4               | 6      | 9      |          |
| chr15:23112925-23128125   | 15201     | 9          | 5    | 2       | 4     | 3     | 7  | 5      | 1     | 3    | 7     | 9               | 6      | 3      |          |
| chr15:46800350-46810550   | 10201     | 9          | 3    | 3       | 1     | 3     | 9  | 4      | 2     | 3    | 3     | 3               | 4      | 4      |          |
| chr4:6714950-6738350      | 23401     | 9          | 5    | 3       | 6     | 3     | 9  | 4      | 1     | 4    | 6     | 3               | 5      | 6      |          |
| chr4:42677625-42779075    | 101451    | 9          | 4    | 2       | 5     | 2     | 2  | 4      | 1     | 3    | 9     | 2               | 6      | 4      |          |
| chr2:19395750-19410525    | 14776     | 9          | 3    | 3       | 2     | 2     | 2  | 4      | 1     | 2    | 9     | 2               | 5      | 5      |          |
| chr2:145589275-145631750  | 42476     | 9          | 3    | 1       | 0     | 1     | 0  | 9      | 0     | 2    | 5     | 1               | 1      | 7      |          |
| chr5:54056975-54069450    | 12476     | 9          | 1    | 0       | 0     | 1     | 1  | 0      | 0     | 0    | 0     | 0               | 9      | 1      |          |
| chr6:154759925-154767025  | 7101      | 9          | 3    | 0       | 2     | 2     | 1  | 9      | 5     | 2    | 3     | 0               | 4      | 3      |          |
| chr6:138783749-138795925  | 12177     | 9          | 4    | 2       | 6     | 2     | 1  | 4      | 1     | 4    | 7     | 1               | 9      | 4      |          |
| chr5:68001200-68009950    | 89751     | 9          | 3    | 2       | 9     | 3     | 2  | 3      | 1     | 4    | 4     | 2               | 4      | 3      |          |
| chr14:86260825-86341250   | 80426     | 9          | 5    | 3       | 6     | 3     | 3  | 7      | 2     | 6    | 9     | 5               | 6      | 7      |          |
| chr9:124209250-124254675  | 45426     | 9          | 5    | 3       | 8     | 3     | 2  | 6      | 1     | 5    | 9     | 4               | 8      | 8      |          |
| chr15:52749925-52822450   | 72526     | 9          | 5    | 3       | 6     | 3     | 3  | 9      | 1     | 4    | 8     | 4               | 7      | 7      |          |
| chr5:39280900-39292500    | 11601     | 9          | 2    | 1       | 2     | 2     | 1  | 1      | 1     | 1    | 1     | 1               | 9      | 1      |          |
| chr7:11275675-11302400    | 26726     | 9          | 4    | 7       | 2     | 2     | 1  | 2      | 6     | 8    | 9     | 1               | 2      | 4      |          |
| chr4:13885025-13926975    | 41951     | 9          | 4    | 2       | 4     | 3     | 2  | 5      | 1     | 4    | 9     | 2               | 7      | 6      |          |
| chr7:63143400-63159850    | 16451     | 9          | 2    | 1       | 2     | 1     | 1  | 2      | 0     | 1    | 9     | 1               | 3      | 2      |          |
| chr13:56129650-56140775   | 11126     | 9          | 2    | 2       | 1     | 1     | 1  | 2      | 3     | 9    | 2     | 1               | 1      | 3      |          |
| chr8:76283650-76351975    | 68326     | 9          | 4    | 2       | 4     | 2     | 2  | 9      | 2     | 4    | 5     | 2               | 4      | 4      |          |
| chr7:115726625-115762575  | 35951     | 9          | 3    | 9       | 1     | 2     | 1  | 1      | 0     | 3    | 5     | 1               | 3      | 3      |          |
| chr12:18869375-18895800   | 26426     | 9          | 2    | 1       | 1     | 1     | 1  | 9      | 1     | 2    | 2     | 1               | 2      | 2      |          |
| chr1:113301525-113321425  | 19901     | 9          | 4    | 2       | 5     | 4     | 2  | 2      | 1     | 2    | 9     | 6               | 8      | 5      |          |
| chr10:116533050-116566275 | 33226     | 9          | 3    | 3       | 4     | 1     | 2  | 3      | 2     | 3    | 9     | 1               | 4      | 5      |          |
| chr5:15345300-153511350   | 56051     | 9          | 5    | 4       | 5     | 4     | 4  | 6      | 3     | 5    | 9     | 4               | 8      | 6      |          |
| chr11:129695825-129745775 | 49951     | 9          | 4    | 2       | 5     | 2     | 1  | 7      | 1     | 3    | 5     | 1               | 5      | 9      |          |
| chr3:3878525-3899175      | 20651     | 9          | 5    | 3       | 4     | 3     | 3  | 6      | 1     | 4    | 8     | 4               | 7      | 9      |          |
| chr9:101603550-101614575  | 11026     | 9          | 3    | 1       | 1     | 1     | 1  | 4      | 0     | 1    | 9     | 7               | 2      | 5      |          |
| chr8:21389625-21522325    | 133601    | 9          | 5    | 6       | 9     | 2     | 3  | 4      | 2     | 4    | 4     | 7               | 8      | 4      |          |
| chr2:107594300-107750025  | 155726    | 9          | 5    | 4       | 6     | 4     | 2  | 5      | 2     | 5    | 8     | 3               | 7      | 9      |          |
| chr13:70096550-70376150   | 279601    | 9          | 6    | 3       | 8     | 3     | 3  | 6      | 3     | 9    | 8     | 3               | 7      | 8      |          |
| chr6:114828600-114909700  | 81101     | 9          | 6    | 6       | 3     | 9     | 3  | 7      | 6     | 2    | 7     | 8               | 4      | 7      |          |
| chr17:49425-59050         | 9626      | 9          | 3    | 1       | 3     | 1     | 0  | 3      | 1     | 3    | 6     | 1               | 9      | 1      |          |
| chr5:1183775-1239275      | 55501     | 9          | 2    | 0       | 3     | 1     | 1  | 3      | 1     | 1    | 1     | 1               | 2      | 9      |          |
| chr18:3306350-33076375    | 11026     | 9          | 2    | 1       | 1     | 0     | 1  | 1      | 0     | 2    | 9     | 2               | 2      | 2      |          |
| chr4:1162925-1175425      | 12501     | 9          | 4    | 2       | 3     | 1     | 2  | 8      | 1     | 4    | 9     | 1               | 4      | 4      |          |
| chr5:77321525-77331525    | 10001     | 9          | 2    | 1       | 1     | 2     | 0  | 3      | 1     | 2    | 3     | 2               | 9      | 2      |          |
| chr8:122409075-122455775  | 46701     | 9          | 5    | 4       | 6     | 3     | 2  | 6      | 2     | 5    | 9     | 6               | 7      | 6      |          |
| chr1:194117800-194158050  | 40251     | 9          | 2    | 2       | 2     | 1     | 1  | 1      | 3     | 9    | 1     | 1               | 1      | 3      |          |
| chr2:207931600-208000325  | 68726     | 9          | 4    | 5       | 5     | 2     | 3  | 4      | 1     | 4    | 6     | 2               | 9      | 7      |          |
| chr6:30109600-30121550    | 11951     | 9          | 4    | 3       | 2     | 2     | 3  | 4      | 1     | 4    | 6     | 2               | 5      | 9      |          |
| chr18:65797050-65814575   | 17526     | 9          | 3    | 0       | 1     | 1     | 0  | 8      | 0     | 1    | 9     | 5               | 5      | 2      |          |
| chr15:40538400-40556125   | 17626     | 9          | 5    | 5       | 6     | 3     | 4  | 2      | 5     | 6    | 4     | 9               | 5      | 2      |          |
| chr3:8816950-8886100      | 69151     | 9          | 4    | 2       | 8     | 2     | 4  | 3      | 1     | 4    | 7     | 3               | 9      | 7      |          |
| chr5:27841100-27880125    | 39026     | 9          | 4    | 3       | 4     | 2     | 1  | 4      | 4     | 9    | 3     | 2               | 4      | 3      |          |
| chr7:93425600-93443100    | 17501     | 9          | 3    | 3       | 1     | 3     | 1  | 3      | 1     | 5    | 3     | 2               | 9      | 2      |          |
| chr14:60832450-60851000   | 18551     | 9          | 4    | 2       | 5     | 2     | 1  | 4      | 1     | 4    | 9     | 4               | 8      | 5      |          |
| chr1:51794250-51821775    | 27526     | 9          | 3    | 1       | 9     | 1     | 1  | 3      | 2     | 2    | 2     | 3               | 2      | 3      |          |
| chr15:72566300-72592700   | 26401     | 9          | 4    | 3       | 9     | 2     | 2  | 4      | 1     | 3    | 7     | 3               | 8      | 6      |          |
| chr16:63817525-63848450   | 30926     | 9          | 4    | 2       | 4     | 3     | 3  | 6      | 1     | 4    | 9     | 2               | 6      | 5      |          |
| chr12:95534400-95556825   | 22426     | 9          | 2    | 1       | 2     | 1     | 2  | 1      | 2     | 9    | 2     | 0               | 2      | 4      |          |
| chr15:77428250-77465075   | 36826     | 9          | 3    | 2       | 4     | 2     | 2  | 3      | 2     | 9    | 4     | 1               | 7      | 3      |          |
| chr10:129903575-129998050 | 94476     | 9          | 4    | 2       | 5     | 2     | 2  | 5      | 1     | 5    | 9     | 2               | 6      | 5      |          |
| chr2:239460050-239536125  | 76076     | 9          | 2    | 3       | 4     | 1     | 0  | 1      | 0     | 1    | 9     | 1               | 1      | 1      |          |
| chr5:82197325-82250800    | 53476     | 8          | 5    | 3       | 5     | 3     | 2  | 8      | 1     | 5    | 8     | 3               | 6      | 5      |          |
| chr14:20977125-20993325   | 16201     | 8          | 4    | 2       | 8     | 3     | 2  | 6      | 1     | 3    | 7     | 1               | 8      | 4      |          |
| chr15:86833575-86843600   | 10026     | 8          | 2    | 1       | 2     | 1     | 0  | 2      | 0     | 0    | 8     | 1               | 1      | 2      |          |
| chr18:11646850-11658050   | 11201     | 8          | 1    | 0       | 0     | 0     | 0  | 0      | 0     | 0    | 0     | 0               | 0      | 8      |          |
| chr14:75762425-75799950   | 37526     | 8          | 3    | 2       | 3     | 3     | 1  | 8      | 1     | 2    | 2     | 3               | 4      | 4      |          |
| chr14:98529150-98680525   | 151376    | 8          | 4    | 2       | 7     | 2     | 2  | 4      | 1     | 5    | 5     | 1               | 8      | 4      |          |
| chr12:92829775-92882150   | 52376     | 8          | 5    | 2       | 4     | 3     | 3  | 8      | 2     | 3    | 8     | 8               | 5      | 5      |          |
| chr3:154164450-154202725  | 38276     | 8          | 4    | 3       | 6     | 3     | 2  | 4      | 1     | 6    | 8     | 3               | 6      | 7      |          |
| chr5:170105175-170132700  | 27526     | 8          | 4    | 2       | 4     | 2     | 3  | 7      | 1     | 5    | 8     | 2               | 6      | 4      |          |
| chr1:179329700-179339750  | 10051     | 8          | 2    | 1       | 1     | 1     | 1  | 1      | 2     | 8    | 1     | 1               | 1      | 2      |          |
| chr1:94958600-94969225    | 10626     | 8          | 2    | 0       | 8     | 1     | 1  | 6      | 0     | 2    | 1     | 0               | 1      | 1      |          |
| chr8:2545200-2594500      | 49301     | 8          | 3    | 3       | 2     | 1     | 1  | 8      | 0     | 1    | 4     | 1               | 4      | 7      |          |
| chr9:2673000-2701050      | 28051     | 8          | 5    | 3       | 5     | 2     | 3  | 8      | 1     | 4    | 8     | 4               | 6      | 6      |          |



| location                  | span (nt) | mean |      | hypothalam |       |       |    |        |       |      |       | skeletal muscle | spleen | testes | Comments |
|---------------------------|-----------|------|------|------------|-------|-------|----|--------|-------|------|-------|-----------------|--------|--------|----------|
|                           |           | max  | mean | adipose    | colon | heart | us | kidney | liver | lung | ovary |                 |        |        |          |
| chr11:1488900-1493500     | 45101     | 8    | 3    | 3          | 2     | 1     | 1  | 7      | 2     | 4    | 4     | 1               | 8      | 3      |          |
| chr14:9699650-97122525    | 125876    | 8    | 3    | 1          | 4     | 2     | 1  | 3      | 1     | 5    | 3     | 1               | 8      | 3      |          |
| chr18:46799075-46810100   | 11026     | 8    | 4    | 3          | 3     | 3     | 2  | 4      | 2     | 3    | 8     | 4               | 5      | 4      |          |
| chrX:57912775-57943025    | 30251     | 8    | 3    | 1          | 3     | 1     | 3  | 3      | 1     | 3    | 8     | 1               | 4      | 2      |          |
| chr11:121425850-121455950 | 30101     | 8    | 3    | 1          | 3     | 5     | 8  | 2      | 1     | 3    | 7     | 2               | 2      | 3      |          |
| chr1:210367025-210384325  | 17301     | 8    | 2    | 2          | 2     | 1     | 1  | 2      | 1     | 2    | 8     | 2               | 3      | 2      |          |
| chr10:31608475-31625250   | 16776     | 8    | 4    | 2          | 4     | 2     | 2  | 5      | 1     | 5    | 8     | 3               | 5      | 4      |          |
| chr4:111456725-111486750  | 30026     | 8    | 4    | 4          | 6     | 3     | 2  | 5      | 1     | 4    | 8     | 2               | 6      | 6      |          |
| chr3:195446400-195513525  | 67126     | 8    | 3    | 2          | 3     | 1     | 1  | 3      | 8     | 8    | 4     | 1               | 1      | 4      |          |
| chr2:77168475-77216350    | 47876     | 8    | 3    | 2          | 3     | 2     | 8  | 3      | 1     | 4    | 4     | 1               | 3      | 3      |          |
| chr9:36409075-36421225    | 12651     | 8    | 3    | 2          | 5     | 1     | 1  | 5      | 0     | 4    | 6     | 1               | 6      | 8      |          |
| chr5:147308325-147389600  | 81276     | 8    | 4    | 3          | 5     | 3     | 2  | 7      | 0     | 4    | 8     | 3               | 6      | 6      |          |
| chr8:125541150-125554540  | 14301     | 8    | 3    | 1          | 2     | 2     | 2  | 3      | 1     | 2    | 8     | 1               | 7      | 2      |          |
| chr15:75573800-75655225   | 81426     | 8    | 4    | 2          | 6     | 4     | 8  | 3      | 0     | 3    | 4     | 3               | 7      | 3      |          |
| chr12:69889725-69989850   | 100126    | 8    | 5    | 3          | 6     | 3     | 2  | 5      | 3     | 8    | 6     | 4               | 4      | 8      |          |
| chr10:120422300-120428500 | 6201      | 8    | 3    | 2          | 1     | 2     | 4  | 2      | 0     | 3    | 8     | 5               | 5      | 4      |          |
| chr4:77361150-77383100    | 21951     | 8    | 3    | 1          | 3     | 1     | 2  | 3      | 8     | 2    | 3     | 3               | 2      | 8      |          |
| chr7:5433575-5444700      | 11126     | 8    | 2    | 1          | 5     | 1     | 2  | 2      | 0     | 2    | 8     | 1               | 2      | 1      |          |
| chr3:16735350-167366325   | 10976     | 8    | 2    | 1          | 2     | 1     | 1  | 8      | 0     | 2    | 3     | 1               | 3      | 1      |          |
| chrX:113528900-113613550  | 84651     | 8    | 4    | 3          | 6     | 3     | 4  | 6      | 1     | 5    | 8     | 3               | 5      | 5      |          |
| chr6:28189525-28199325    | 9801      | 8    | 4    | 4          | 3     | 3     | 4  | 5      | 2     | 3    | 8     | 3               | 8      | 4      |          |
| chr1:179196475-179208700  | 12226     | 8    | 3    | 3          | 3     | 2     | 3  | 4      | 1     | 3    | 8     | 2               | 5      | 2      |          |
| chr4:68133150-68148025    | 14876     | 8    | 2    | 2          | 2     | 0     | 1  | 1      | 0     | 2    | 8     | 1               | 4      | 1      |          |
| chr8:108150775-108322000  | 171226    | 8    | 5    | 4          | 6     | 3     | 4  | 4      | 2     | 6    | 8     | 5               | 6      | 7      |          |
| chr11:96952375-97086200   | 133826    | 8    | 5    | 3          | 6     | 4     | 2  | 7      | 2     | 4    | 8     | 3               | 8      | 6      |          |
| chr2:27033450-27045625    | 12176     | 8    | 3    | 2          | 3     | 2     | 1  | 3      | 1     | 3    | 8     | 2               | 4      | 4      |          |
| chr1:212579525-212590244  | 10720     | 8    | 4    | 4          | 3     | 5     | 2  | 7      | 1     | 3    | 6     | 8               | 4      | 4      |          |
| chr2:30968700-30980475    | 11776     | 8    | 1    | 0          | 0     | 0     | 0  | 8      | 0     | 0    | 0     | 0               | 0      | 0      |          |
| chr16:47237250-47265300   | 28051     | 8    | 5    | 3          | 8     | 3     | 2  | 6      | 2     | 6    | 8     | 3               | 8      | 7      |          |
| chr2:16335875-16523025    | 187151    | 8    | 4    | 3          | 8     | 2     | 2  | 3      | 1     | 3    | 5     | 2               | 4      | 6      |          |
| chr20:58089800-58106500   | 16701     | 8    | 1    | 0          | 1     | 0     | 1  | 0      | 0     | 0    | 0     | 0               | 1      | 8      |          |
| chr12:29121750-29172275   | 50526     | 8    | 5    | 4          | 5     | 5     | 4  | 7      | 2     | 5    | 8     | 3               | 8      | 6      |          |
| chr10:4934575-4967950     | 33376     | 8    | 3    | 2          | 2     | 3     | 2  | 2      | 6     | 2    | 4     | 1               | 3      | 8      |          |
| chr2:217088775-217129475  | 40701     | 8    | 3    | 1          | 2     | 1     | 2  | 1      | 1     | 8    | 2     | 3               | 3      | 5      |          |
| chr11:106680375-106691525 | 11151     | 8    | 3    | 1          | 1     | 2     | 3  | 6      | 1     | 3    | 4     | 4               | 8      | 3      |          |
| chr5:133796150-133810875  | 14726     | 8    | 2    | 0          | 1     | 3     | 1  | 1      | 0     | 1    | 0     | 8               | 1      | 1      |          |
| chr13:96654250-96665325   | 11076     | 8    | 2    | 1          | 3     | 1     | 1  | 1      | 3     | 8    | 2     | 0               | 0      | 5      |          |
| chr4:33522725-33553200    | 30476     | 8    | 3    | 1          | 4     | 3     | 2  | 2      | 1     | 8    | 4     | 2               | 6      | 3      |          |
| chr5:100411875-100464525  | 52651     | 8    | 4    | 3          | 7     | 3     | 3  | 5      | 2     | 5    | 8     | 2               | 5      | 5      |          |
| chrX:39654075-39718125    | 64051     | 8    | 2    | 1          | 8     | 1     | 1  | 1      | 0     | 1    | 3     | 1               | 2      | 2      |          |
| chr6:29346025-29356300    | 10276     | 8    | 4    | 4          | 5     | 3     | 2  | 4      | 1     | 3    | 8     | 3               | 5      | 6      |          |
| chr7:125011450-125108750  | 97301     | 8    | 3    | 2          | 4     | 2     | 1  | 2      | 2     | 8    | 2     | 1               | 2      | 3      |          |
| chr4:34489300-34508825    | 10526     | 8    | 4    | 1          | 3     | 2     | 1  | 8      | 1     | 6    | 6     | 1               | 7      | 4      |          |
| chr14:97192075-97236700   | 44626     | 8    | 4    | 3          | 4     | 3     | 3  | 6      | 8     | 5    | 5     | 3               | 4      | 5      |          |
| chr4:75129050-75167025    | 39796     | 8    | 3    | 2          | 1     | 1     | 1  | 2      | 3     | 8    | 2     | 1               | 2      | 4      |          |
| chr7:129031750-129038650  | 6901      | 8    | 4    | 3          | 7     | 2     | 3  | 7      | 1     | 3    | 7     | 1               | 8      | 6      |          |
| chr9:5129600-5146200      | 16601     | 8    | 3    | 2          | 2     | 3     | 1  | 4      | 1     | 4    | 5     | 4               | 8      | 5      |          |
| chr6:98783950-98895400    | 111451    | 8    | 4    | 2          | 6     | 2     | 5  | 5      | 1     | 5    | 6     | 2               | 5      | 8      |          |
| chr2:221252075-221314050  | 61976     | 8    | 5    | 3          | 5     | 4     | 4  | 6      | 2     | 8    | 7     | 5               | 6      | 5      |          |
| chr7:80594925-80732275    | 137351    | 8    | 4    | 2          | 6     | 3     | 3  | 5      | 2     | 4    | 8     | 2               | 6      | 6      |          |
| chr2:157739200-157801400  | 62201     | 8    | 3    | 2          | 3     | 2     | 3  | 3      | 1     | 2    | 3     | 2               | 4      | 8      |          |
| chr22:33904725-33953150   | 48426     | 8    | 4    | 2          | 4     | 7     | 4  | 4      | 3     | 4    | 8     | 3               | 5      | 6      |          |
| chr2:105915600-105995825  | 80226     | 8    | 4    | 2          | 5     | 2     | 3  | 5      | 5     | 8    | 5     | 2               | 6      | 6      |          |
| chr7:30517800-30529075    | 11276     | 8    | 4    | 4          | 3     | 3     | 2  | 7      | 1     | 4    | 6     | 4               | 8      | 4      |          |
| chr1:119352575-119365400  | 12826     | 8    | 3    | 2          | 1     | 2     | 1  | 4      | 1     | 5    | 8     | 1               | 3      | 3      |          |
| chr10:6663500-6677950     | 14451     | 8    | 2    | 1          | 2     | 0     | 3  | 3      | 0     | 3    | 2     | 8               | 4      | 1      |          |
| chr14:50799425-50830400   | 30976     | 7    | 4    | 2          | 2     | 2     | 2  | 4      | 1     | 7    | 4     | 1               | 7      | 6      |          |
| chr6:132319775-13232075   | 12301     | 7    | 2    | 1          | 2     | 1     | 1  | 1      | 0     | 1    | 7     | 0               | 1      | 2      |          |
| chr7:77147550-77161525    | 13976     | 7    | 4    | 2          | 7     | 3     | 3  | 6      | 4     | 5    | 5     | 2               | 3      | 4      |          |
| chr11:72124275-72140250   | 15976     | 7    | 2    | 1          | 3     | 1     | 1  | 1      | 1     | 3    | 2     | 0               | 7      | 0      |          |
| chr5:49667825-49697900    | 30076     | 7    | 2    | 1          | 2     | 2     | 1  | 2      | 1     | 4    | 2     | 1               | 7      | 2      |          |
| chr10:80162000-80341225   | 179226    | 7    | 3    | 4          | 6     | 2     | 7  | 3      | 1     | 3    | 3     | 2               | 2      | 3      |          |
| chrX:125218650-125243775  | 25126     | 7    | 5    | 3          | 7     | 2     | 4  | 5      | 2     | 6    | 6     | 2               | 6      | 5      |          |
| chr2:167180050-167221900  | 41851     | 7    | 3    | 2          | 2     | 2     | 1  | 3      | 2     | 7    | 4     | 1               | 4      | 5      |          |
| chr15:47173125-47199050   | 25926     | 7    | 4    | 3          | 3     | 3     | 5  | 4      | 2     | 5    | 4     | 6               | 7      | 2      |          |
| chr5:1597500-1620100      | 22601     | 7    | 2    | 1          | 2     | 0     | 1  | 2      | 0     | 7    | 2     | 0               | 3      | 1      |          |
| chr8:50277200-50391700    | 114501    | 7    | 5    | 4          | 5     | 4     | 3  | 6      | 1     | 6    | 7     | 5               | 5      | 7      |          |
| chr7:7252400-7267000      | 14601     | 7    | 2    | 0          | 1     | 2     | 2  | 4      | 1     | 3    | 1     | 2               | 7      | 1      |          |
| chrX:138752200-138762250  | 10051     | 7    | 4    | 2          | 6     | 2     | 1  | 4      | 1     | 4    | 6     | 2               | 7      | 5      |          |
| chrX:6577525-6619425      | 41901     | 7    | 3    | 1          | 2     | 2     | 1  | 4      | 1     | 3    | 7     | 2               | 3      | 3      |          |
| chr2:7917975-7969300      | 51326     | 7    | 4    | 2          | 4     | 2     | 2  | 5      | 2     | 7    | 6     | 2               | 4      | 5      |          |
| chr14:80950175-80970975   | 20801     | 7    | 3    | 1          | 2     | 1     | 2  | 7      | 0     | 1    | 3     | 1               | 7      | 2      |          |
| chr5:92788525-92800450    | 11926     | 7    | 2    | 0          | 0     | 0     | 1  | 3      | 1     | 1    | 7     | 0               | 2      | 2      |          |
| chrX:115823450-115840525  | 17076     | 7    | 3    | 1          | 3     | 2     | 2  | 6      | 0     | 4    | 7     | 1               | 4      | 4      |          |
| chr6:53704600-53744825    | 40226     | 7    | 3    | 1          | 4     | 1     | 2  | 7      | 0     | 4    | 5     | 1               | 5      | 5      |          |
| chr12:130395250-130407325 | 12076     | 7    | 2    | 1          | 1     | 1     | 1  | 1      | 3     | 7    | 1     | 0               | 0      | 2      |          |
| chr2:46288525-46300250    | 11726     | 7    | 2    | 1          | 1     | 1     | 1  | 2      | 3     | 7    | 2     | 1               | 2      | 3      |          |
| chr1:81414200-81494775    | 80576     | 7    | 4    | 3          | 5     | 3     | 2  | 2      | 3     | 5    | 7     | 2               | 5      | 4      |          |
| chrX:44194775-44217950    | 23176     | 7    | 2    | 1          | 7     | 1     | 1  | 2      | 0     | 2    | 2     | 0               | 1      | 1      |          |
| chr1:229087100-229097900  | 10801     | 7    | 4    | 3          | 5     | 2     | 4  | 2      | 2     | 4    | 4     | 4               | 5      | 7      |          |
| chr6:2737475-2768400      | 30926     | 7    | 3    | 3          | 2     | 3     | 2  | 3      | 1     | 3    | 7     | 3               | 6      | 3      |          |
| chr8:108779875-108813100  | 33226     | 7    | 4    | 3          | 6     | 2     | 2  | 5      | 1     | 4    | 7     | 2               | 6      | 4      |          |
| chrX:38601375-38677625    | 76251     | 7    | 4    | 2          | 5     | 2     | 2  | 4      | 1     | 5    | 7     | 3               | 5      | 5      |          |
| chr8:105676400-105757350  | 80951     | 7    | 3    | 2          | 4     | 2     | 2  | 3      | 1     | 3    | 5     | 1               | 4      | 7      |          |
| chr6:12007000-12022300    | 15301     | 7    | 3    | 2          | 1     | 4     | 7  | 6      | 3     | 6    | 1     | 0               | 1      | 5      |          |
| chr16:11464875-11492800   | 27926     | 7    | 3    | 2          | 3     | 1     | 1  | 2      | 1     | 4    | 2     | 3               | 7      | 3      |          |
| chr8:6541450-6552025      | 10576     | 7    | 3    | 1          | 5     | 1     | 1  | 5      | 0     | 2    | 4     | 1               | 7      | 4      |          |
| chr3:47182200-47192800    | 10601     | 7    | 4    | 2          | 4     | 2     | 3  | 7      | 1     | 5    | 6     | 3               | 4      | 6      |          |
| chr4:368275-378300        | 10026     | 7    | 3    | 2          | 2     | 2     | 2  | 2      | 1     | 1    | 7     | 3               | 4      | 4      |          |
| chrX:10963875-11001100    | 37226     | 7    | 4    | 3          | 6     | 3     | 2  | 5      | 1     | 3    | 7     | 2               | 5      | 6      |          |
| chr2:239994925-240122575  | 127651    | 7    | 3    | 3          | 7     | 2     | 2  | 3      | 1     | 5    | 5     | 1               | 4      | 4      |          |
| chr5:56013475-56103075    | 89601     | 7    | 4    | 2          | 5     | 3     | 2  | 4      | 1     | 4    | 7     | 2               | 7      | 5      |          |
| chrX:102885925-102902750  | 16826     | 7    | 2    | 2          | 1     | 1     | 1  | 1      | 2     | 7    | 2     | 0               | 1      | 3      |          |
| chr17:7716675-7728025     | 11351     | 7    | 4    | 2          | 3     | 5     | 5  | 4      | 0     | 3    | 7     | 4               | 7      | 6      |          |
| chr5:95945275-96020850    | 75576     | 7    | 4    | 3          | 3     | 4     | 4  | 5      | 1     | 4    | 7     | 2               | 6      | 4      |          |
| chr9:15989575-16042100    | 52526     | 7    | 2    | 1          | 2     | 1     | 2  | 4      | 0     | 2    | 7     | 1               | 2      | 4      |          |
| chr20:5134450-5152500     | 18051     | 7    | 5    | 2          | 5     | 4     | 7  | 4      | 1     | 4    | 7     | 6               | 7      | 4      |          |
| chr2:101422625-101454925  | 32301     | 7    | 4    | 3          | 4     | 2     | 2  | 5      | 1     | 4    | 7     | 2               | 6      | 5      |          |
| chr5:44862425-44872625    | 10201     | 7    | 3    | 1          | 1     | 2     | 3  | 5      | 1     | 2    | 5     | 7               | 4      | 2      |          |
| chr12:459397              |           |      |      |            |       |       |    |        |       |      |       |                 |        |        |          |

| location                  | span (nt) |     |      | hypothalam |       |       |    |        |       |      |       | skeletal |        |        | Comments |
|---------------------------|-----------|-----|------|------------|-------|-------|----|--------|-------|------|-------|----------|--------|--------|----------|
|                           |           | max | mean | adipose    | colon | heart | us | kidney | liver | lung | ovary | muscle   | spleen | testes |          |
| chr10:1085825-1091600     | 5776      | 7   | 2    | 1          | 2     | 1     | 1  | 4      | 1     | 2    | 3     | 1        | 7      | 4      |          |
| chr2:57699575-57740425    | 40851     | 7   | 3    | 2          | 1     | 1     | 1  | 2      | 1     | 2    | 6     | 2        | 7      | 4      |          |
| chr8:28538200-28593425    | 55226     | 7   | 4    | 2          | 6     | 3     | 3  | 3      | 2     | 5    | 7     | 2        | 4      | 4      |          |
| chr11:68926100-69048700   | 122601    | 7   | 3    | 2          | 7     | 2     | 2  | 3      | 2     | 3    | 3     | 1        | 3      | 2      |          |
| chr7:99948500-99966925    | 18426     | 7   | 4    | 4          | 4     | 2     | 2  | 4      | 2     | 6    | 3     | 2        | 4      | 6      |          |
| chr6:2414150-2484475      | 70326     | 7   | 4    | 3          | 4     | 2     | 5  | 7      | 4     | 4    | 4     | 1        | 3      | 3      |          |
| chr11:7855925-7880950     | 25026     | 7   | 2    | 1          | 1     | 1     | 1  | 2      | 1     | 7    | 1     | 0        | 2      | 4      |          |
| chr6:48152775-48178175    | 25401     | 7   | 2    | 1          | 1     | 3     | 0  | 2      | 1     | 7    | 2     | 1        | 1      | 2      |          |
| chr6:85445825-85562825    | 117001    | 7   | 4    | 3          | 7     | 2     | 5  | 4      | 1     | 4    | 4     | 2        | 4      | 6      |          |
| chr2:181696500-181651275  | 14776     | 7   | 4    | 1          | 4     | 2     | 3  | 6      | 1     | 2    | 7     | 3        | 6      | 7      |          |
| chr3:130058000-130074800  | 16801     | 7   | 4    | 2          | 1     | 7     | 2  | 1      | 1     | 2    | 0     | 1        | 7      | 1      |          |
| chr7:79626350-79664125    | 37776     | 7   | 4    | 2          | 4     | 2     | 2  | 6      | 2     | 4    | 6     | 2        | 5      | 7      |          |
| chr11:61150700-61162450   | 11751     | 7   | 4    | 4          | 4     | 4     | 1  | 4      | 7     | 4    | 4     | 3        | 6      | 3      |          |
| chr10:113880000-113890875 | 10876     | 7   | 2    | 7          | 6     | 1     | 0  | 0      | 1     | 1    | 1     | 0        | 0      | 0      |          |
| chr8:104323575-104358050  | 34476     | 7   | 3    | 2          | 2     | 3     | 5  | 7      | 1     | 5    | 4     | 1        | 5      | 4      |          |
| chr9:114007475-114015775  | 8301      | 7   | 3    | 1          | 2     | 3     | 1  | 4      | 1     | 4    | 3     | 1        | 7      | 4      |          |
| chr6:56917375-56926575    | 9201      | 7   | 2    | 1          | 0     | 1     | 4  | 1      | 1     | 7    | 1     | 0        | 1      | 1      |          |
| chr7:63000650-63023550    | 22901     | 7   | 4    | 2          | 3     | 4     | 3  | 3      | 3     | 7    | 6     | 1        | 5      | 5      |          |
| chr6:37180500-37212625    | 32126     | 6   | 2    | 2          | 5     | 2     | 2  | 2      | 1     | 6    | 2     | 1        | 2      | 2      |          |
| chr22:26646350-26652975   | 6626      | 6   | 3    | 2          | 3     | 2     | 2  | 3      | 2     | 3    | 6     | 2        | 5      | 5      |          |
| chr7:29552375-29568225    | 15851     | 6   | 1    | 0          | 6     | 0     | 0  | 2      | 0     | 1    | 2     | 0        | 0      | 1      |          |
| chr12:64452900-64492900   | 40001     | 6   | 2    | 1          | 2     | 1     | 0  | 2      | 0     | 1    | 6     | 1        | 1      | 1      |          |
| chr21:39415875-39444300   | 28426     | 6   | 3    | 2          | 3     | 2     | 3  | 2      | 3     | 3    | 6     | 4        | 5      | 4      |          |
| chr10:116460425-116473650 | 13226     | 6   | 3    | 4          | 4     | 3     | 2  | 6      | 0     | 2    | 3     | 2        | 2      | 2      |          |
| chr12:2733775-2756550     | 22776     | 6   | 3    | 2          | 4     | 2     | 1  | 2      | 1     | 3    | 6     | 2        | 4      | 4      |          |
| chr12:5248100-5298825     | 50726     | 6   | 3    | 2          | 6     | 2     | 2  | 4      | 1     | 3    | 6     | 2        | 4      | 5      |          |
| chr5:139072325-139135900  | 63576     | 6   | 4    | 3          | 6     | 2     | 3  | 3      | 2     | 6    | 3     | 2        | 5      | 4      |          |
| chr2:237685400-237732100  | 46701     | 6   | 3    | 1          | 2     | 2     | 0  | 2      | 0     | 1    | 6     | 3        | 3      | 6      |          |
| chr1:85836625-85880575    | 43951     | 6   | 4    | 1          | 5     | 2     | 2  | 5      | 2     | 3    | 6     | 4        | 6      | 3      |          |
| chr1:91132500-91146825    | 14326     | 6   | 3    | 1          | 2     | 2     | 1  | 3      | 1     | 3    | 6     | 2        | 6      | 2      |          |
| chr10:76728025-76749800   | 21776     | 6   | 3    | 2          | 4     | 2     | 2  | 4      | 2     | 6    | 4     | 3        | 6      | 3      |          |
| chr6:11758275-11776200    | 17926     | 6   | 2    | 1          | 1     | 1     | 1  | 1      | 2     | 6    | 2     | 0        | 1      | 2      |          |
| chr6:74040350-74054750    | 14401     | 6   | 2    | 1          | 3     | 1     | 2  | 2      | 1     | 2    | 6     | 0        | 3      | 3      |          |
| chr6:18142500-18217725    | 75226     | 6   | 4    | 2          | 6     | 2     | 3  | 4      | 3     | 6    | 5     | 1        | 5      | 6      |          |
| chr1:120940875-120953875  | 13001     | 6   | 4    | 3          | 2     | 5     | 4  | 5      | 6     | 3    | 5     | 3        | 6      | 3      |          |
| chr4:72215925-72232750    | 16826     | 6   | 4    | 3          | 4     | 4     | 4  | 5      | 3     | 5    | 6     | 2        | 4      | 5      |          |
| chr4:125759125-125791075  | 31951     | 6   | 3    | 1          | 3     | 3     | 1  | 2      | 1     | 4    | 6     | 1        | 4      | 2      |          |
| chr8:106235775-106344550  | 108776    | 6   | 4    | 3          | 4     | 3     | 2  | 4      | 1     | 5    | 6     | 3        | 5      | 5      |          |
| chr5:134493025-134619900  | 126876    | 6   | 3    | 2          | 5     | 1     | 1  | 3      | 0     | 2    | 5     | 6        | 3      | 4      |          |
| chr9:127207725-127218875  | 11151     | 6   | 1    | 1          | 2     | 0     | 1  | 1      | 1     | 2    | 6     | 0        | 1      | 1      |          |
| chr14:99267075-99297500   | 30426     | 6   | 2    | 1          | 6     | 2     | 1  | 4      | 0     | 5    | 2     | 1        | 2      | 2      |          |
| chr13:19287250-19304250   | 17001     | 6   | 3    | 2          | 3     | 3     | 2  | 3      | 1     | 3    | 5     | 3        | 6      | 4      |          |
| chr5:8490875-8526025      | 35151     | 6   | 4    | 5          | 2     | 6     | 3  | 6      | 1     | 3    | 3     | 3        | 4      | 6      |          |
| chr13:38747350-38802725   | 54926     | 6   | 3    | 2          | 3     | 3     | 1  | 2      | 1     | 4    | 6     | 2        | 5      | 4      |          |
| chr15:79036700-79049525   | 12826     | 6   | 3    | 2          | 4     | 2     | 2  | 4      | 1     | 3    | 6     | 2        | 4      | 4      |          |
| chr12:95477300-95516900   | 39601     | 6   | 2    | 0          | 1     | 1     | 2  | 1      | 0     | 5    | 3     | 0        | 2      | 6      |          |
| chr17:39456275-39467525   | 11251     | 6   | 4    | 3          | 6     | 3     | 2  | 5      | 2     | 3    | 6     | 2        | 6      | 5      |          |
| chr13:47534400-47540050   | 5651      | 6   | 2    | 1          | 1     | 3     | 0  | 4      | 1     | 3    | 6     | 2        | 5      | 2      |          |
| chr4:8541575-8566850      | 25276     | 6   | 3    | 2          | 3     | 1     | 3  | 4      | 1     | 3    | 6     | 2        | 2      | 4      |          |
| chr7:36737750-36788825    | 51076     | 6   | 2    | 1          | 1     | 1     | 2  | 4      | 0     | 5    | 3     | 0        | 6      | 3      |          |
| chr15:79524225-79548025   | 23801     | 6   | 2    | 0          | 1     | 1     | 1  | 1      | 2     | 1    | 6     | 1        | 3      | 4      |          |
| chr8:111817150-111883075  | 65926     | 6   | 3    | 2          | 4     | 4     | 2  | 3      | 1     | 3    | 6     | 1        | 5      | 4      |          |
| chr6:139674475-139684850  | 10376     | 6   | 1    | 0          | 1     | 0     | 0  | 0      | 0     | 1    | 3     | 0        | 6      | 2      |          |
| chr3:43162175-43282975    | 120801    | 6   | 3    | 2          | 6     | 2     | 2  | 3      | 2     | 3    | 6     | 2        | 3      | 4      |          |
| chr1:39776600-39792825    | 16226     | 6   | 3    | 2          | 3     | 1     | 2  | 3      | 0     | 2    | 6     | 5        | 3      | 3      |          |
| chr4:54483050-54499200    | 16151     | 6   | 2    | 1          | 1     | 1     | 1  | 2      | 2     | 6    | 2     | 2        | 2      | 2      |          |
| chr9:137244375-137371000  | 126626    | 6   | 2    | 2          | 6     | 2     | 2  | 2      | 1     | 4    | 3     | 1        | 3      | 2      |          |
| chr16:3113750-3124850     | 11101     | 6   | 3    | 2          | 5     | 2     | 2  | 4      | 1     | 2    | 6     | 2        | 5      | 2      |          |
| chr5:57860400-57875950    | 15551     | 6   | 3    | 1          | 4     | 2     | 2  | 4      | 1     | 4    | 6     | 2        | 5      | 4      |          |
| chr5:90759300-90789150    | 29851     | 6   | 3    | 1          | 4     | 1     | 1  | 3      | 1     | 3    | 3     | 3        | 5      | 6      |          |
| chr21:43712475-43723950   | 11476     | 6   | 2    | 1          | 4     | 1     | 0  | 0      | 6     | 2    | 3     | 1        | 1      | 2      |          |
| chr10:62726900-62746900   | 20001     | 6   | 1    | 1          | 1     | 1     | 0  | 1      | 3     | 6    | 0     | 0        | 0      | 2      |          |
| chr2:146013750-146223325  | 209576    | 6   | 4    | 2          | 5     | 2     | 3  | 4      | 2     | 6    | 5     | 2        | 4      | 4      |          |
| chr12:7324400-7339725     | 15326     | 6   | 3    | 2          | 2     | 2     | 2  | 3      | 2     | 3    | 6     | 2        | 4      | 4      |          |
| chr13:74376150-74419100   | 42951     | 6   | 3    | 2          | 4     | 2     | 2  | 3      | 1     | 3    | 6     | 2        | 4      | 4      |          |
| chr2:42002850-42053225    | 50376     | 6   | 2    | 2          | 3     | 1     | 1  | 2      | 0     | 4    | 6     | 1        | 3      | 3      |          |
| chr9:14575325-14587525    | 12201     | 6   | 2    | 1          | 2     | 1     | 2  | 3      | 0     | 2    | 3     | 1        | 6      | 3      |          |
| chr13:84444275-84578075   | 133801    | 6   | 4    | 2          | 6     | 2     | 2  | 3      | 2     | 5    | 5     | 2        | 4      | 6      |          |
| chr2:41924000-41937475    | 13476     | 6   | 3    | 4          | 3     | 3     | 2  | 2      | 3     | 3    | 6     | 2        | 4      | 4      |          |
| chr7:37800325-37812150    | 11826     | 6   | 2    | 1          | 1     | 1     | 0  | 1      | 2     | 6    | 1     | 0        | 3      | 2      |          |
| chr12:30814550-30854925   | 40376     | 6   | 3    | 3          | 2     | 2     | 3  | 4      | 1     | 2    | 6     | 3        | 3      | 4      |          |
| chr15:55822375-55857650   | 35276     | 6   | 1    | 1          | 1     | 1     | 1  | 1      | 1     | 6    | 1     | 0        | 1      | 1      |          |
| chr4:99326125-99342425    | 16301     | 6   | 1    | 1          | 1     | 0     | 1  | 1      | 0     | 6    | 1     | 0        | 2      | 2      |          |
| chr6:83161900-83211150    | 49251     | 6   | 3    | 3          | 3     | 4     | 2  | 5      | 0     | 5    | 4     | 1        | 6      | 4      |          |
| chr4:124718875-12479675   | 30801     | 6   | 2    | 1          | 1     | 1     | 1  | 1      | 1     | 6    | 2     | 1        | 2      | 4      |          |
| chr6:3926525-3939100      | 12576     | 6   | 3    | 2          | 3     | 1     | 2  | 4      | 1     | 6    | 5     | 2        | 6      | 4      |          |
| chr8:37109300-37205775    | 96476     | 6   | 3    | 1          | 5     | 2     | 1  | 3      | 1     | 3    | 6     | 2        | 4      | 4      |          |
| chr11:30371700-30382775   | 11076     | 6   | 2    | 1          | 1     | 1     | 3  | 6      | 1     | 1    | 1     | 2        | 1      | 1      |          |
| chr2:14568975-145757350   | 67576     | 6   | 2    | 1          | 2     | 1     | 1  | 6      | 2     | 6    | 2     | 1        | 1      | 3      |          |
| chr7:35750875-35764150    | 13276     | 6   | 3    | 2          | 2     | 1     | 6  | 5      | 1     | 1    | 3     | 2        | 2      | 5      |          |
| chr6:44114325-44170550    | 56226     | 6   | 2    | 1          | 2     | 1     | 1  | 1      | 0     | 5    | 4     | 6        | 3      | 2      |          |
| chr19:47466700-47476275   | 9576      | 6   | 4    | 2          | 5     | 3     | 3  | 4      | 2     | 5    | 4     | 3        | 6      | 5      |          |
| chr5:79329500-79349525    | 20026     | 6   | 2    | 0          | 1     | 1     | 3  | 6      | 0     | 1    | 5     | 2        | 3      | 6      |          |
| chrX:58337500-58371350    | 33851     | 6   | 2    | 5          | 1     | 1     | 3  | 2      | 0     | 1    | 2     | 1        | 2      | 6      |          |
| chr13:42278100-42340125   | 62026     | 6   | 4    | 4          | 6     | 4     | 2  | 4      | 2     | 5    | 5     | 3        | 4      | 5      |          |
| chr22:22567775-22575550   | 7776      | 6   | 2    | 1          | 6     | 1     | 1  | 1      | 2     | 1    | 3     | 1        | 2      | 4      |          |
| chr7:8311175-8366500      | 55326     | 6   | 3    | 2          | 4     | 3     | 2  | 4      | 1     | 4    | 6     | 2        | 4      | 5      |          |
| chr15:77191800-77204850   | 13051     | 6   | 1    | 1          | 0     | 1     | 1  | 1      | 2     | 6    | 0     | 0        | 0      | 2      |          |
| chr8:90958775-9097600     | 18826     | 6   | 3    | 1          | 3     | 1     | 2  | 4      | 2     | 3    | 5     | 1        | 6      | 2      |          |
| chr10:27288300-27300050   | 11751     | 6   | 2    | 2          | 2     | 1     | 1  | 6      | 1     | 2    | 4     | 1        | 3      | 2      |          |
| chr8:80224875-80250800    | 25926     | 6   | 3    | 2          | 4     | 2     | 2  | 3      | 2     | 5    | 6     | 2        | 3      | 5      |          |
| chr4:90216125-90233175    | 17051     | 6   | 4    | 3          | 6     | 2     | 2  | 6      | 1     | 4    | 5     | 2        | 5      | 5      |          |
| chr13:49658575-49701625   | 43051     | 6   | 2    | 0          | 5     | 1     | 1  | 3      | 2     | 2    | 2     | 1        | 6      | 3      |          |
| chr8:26350000-26365750    | 15751     | 6   | 3    | 2          | 2     | 2     | 1  | 5      | 0     | 5    | 6     | 1        | 3      | 2      |          |
| chrX:48460225-48477975    | 17751     | 6   | 3    | 1          | 6     | 1     | 2  | 3      | 0     | 2    | 6     | 1        | 5      | 6      |          |
| chr14:80937850-80948425   | 10576     | 6   | 2    | 1          | 1     | 1     | 1  | 6      | 0     | 1    | 3     | 0        | 6      | 1      |          |
| chr13:29410325-29519200   | 108876    | 6   | 4    | 2          | 5     | 3     | 3  | 3      | 2     | 5    | 6     | 2        | 4      | 5      |          |
| chr4:79780850-79806375    | 25526     | 6   | 2    | 2          | 1     | 1     | 6  | 1      | 0     | 1    | 1     | 1        | 3      | 1      |          |
| chr16:11375775-11386450   | 10676     | 6   | 1    | 0          | 1     | 1     | 0  | 0      | 0     | 1    | 1     | 1        | 6      | 1      |          |
| chr8:123572275-123648225  | 75951     | 6   | 2    | 1          | 2     | 6     | 1  | 2      | 1     | 2    | 3     | 1        | 2      | 2      |          |
| chr2:59545675-59619200    | 73526     | 6   | 4    | 2          | 6     | 2     | 2  | 5      | 3     | 5    | 5     | 2        | 4      | 4      |          |
| chr1:179407300-179428500  | 21201     | 6   | 2    | 1          | 1     | 1     | 1  | 1      | 2     | 6    | 1     | 0        | 1      | 2      |          |
| chr4:90584375-9060325     | 65951     | 6   | 3    | 1          | 2     | 1     | 1  | 2      | 1     | 2    | 4     | 1        | 3      | 6      |          |
| chr4:93394950-93417950    | 23001     | 6   | 3    | 1          | 4     | 2     | 2  | 4      | 1     | 3    |       |          |        |        |          |

| location                  | span (nt) | max     |       | mean  |    | hypothalam |       |      |       |        |        |        |   | skeletal muscle |   | spleen | testes | Comments |
|---------------------------|-----------|---------|-------|-------|----|------------|-------|------|-------|--------|--------|--------|---|-----------------|---|--------|--------|----------|
|                           |           | adipose | colon | heart | us | kidney     | liver | lung | ovary | muscle | spleen | testes |   |                 |   |        |        |          |
| chr14:4917275-49179275    | 6501      | 5       | 2     | 1     | 4  | 2          | 1     | 4    | 0     | 1      | 4      | 0      | 1 | 4               | 1 | 5      | 2      |          |
| chr2:48342900-48376875    | 33976     | 5       | 2     | 1     | 2  | 1          | 1     | 2    | 1     | 3      | 2      | 1      | 5 | 4               | 1 | 5      | 4      |          |
| chr5:120635200-120699075  | 63876     | 5       | 3     | 2     | 5  | 2          | 2     | 4    | 5     | 3      | 5      | 2      | 3 | 4               | 3 | 4      | 4      |          |
| chr10:90729225-90740200   | 10976     | 5       | 2     | 3     | 1  | 2          | 5     | 1    | 1     | 4      | 4      | 1      | 3 | 2               | 1 | 3      | 2      |          |
| chr4:2757175-2787100      | 29926     | 5       | 2     | 1     | 5  | 2          | 1     | 5    | 1     | 4      | 1      | 0      | 5 | 1               | 1 | 5      | 1      |          |
| chr4:85418625-85432325    | 13701     | 5       | 3     | 2     | 3  | 2          | 1     | 3    | 1     | 2      | 5      | 2      | 4 | 3               | 2 | 4      | 3      |          |
| chr8:2683850-2700525      | 16676     | 5       | 2     | 2     | 1  | 0          | 1     | 5    | 0     | 2      | 3      | 0      | 3 | 2               | 0 | 3      | 2      |          |
| chr2:85975525-86007075    | 31551     | 5       | 3     | 3     | 3  | 2          | 5     | 2    | 0     | 4      | 3      | 1      | 4 | 2               | 1 | 4      | 2      |          |
| chr5:92830575-92842275    | 11701     | 5       | 1     | 0     | 1  | 1          | 1     | 2    | 1     | 1      | 5      | 0      | 2 | 2               | 1 | 2      | 2      |          |
| chr13:100010550-100034475 | 23926     | 5       | 3     | 3     | 3  | 2          | 1     | 4    | 0     | 2      | 3      | 1      | 5 | 3               | 1 | 5      | 3      |          |
| chr5:55919625-55956375    | 36751     | 5       | 3     | 1     | 1  | 1          | 0     | 5    | 0     | 1      | 2      | 1      | 3 | 2               | 1 | 3      | 2      |          |
| chr2:116680450-116726125  | 45676     | 5       | 1     | 2     | 1  | 2          | 0     | 1    | 0     | 2      | 2      | 1      | 5 | 2               | 1 | 5      | 2      |          |
| chr4:45434200-45475850    | 41651     | 5       | 3     | 2     | 3  | 2          | 1     | 2    | 1     | 2      | 5      | 2      | 4 | 3               | 2 | 4      | 3      |          |
| chr10:5146300-5161275     | 14976     | 5       | 2     | 1     | 1  | 1          | 0     | 2    | 5     | 1      | 3      | 0      | 1 | 1               | 1 | 5      | 1      |          |
| chr1:59255200-59301300    | 46101     | 5       | 2     | 2     | 2  | 1          | 1     | 2    | 0     | 2      | 5      | 4      | 4 | 1               | 1 | 5      | 1      |          |
| chrX:56824125-56848925    | 24801     | 5       | 2     | 1     | 4  | 2          | 1     | 3    | 0     | 2      | 5      | 1      | 5 | 3               | 1 | 5      | 3      |          |
| chr8:24112325-24140875    | 28551     | 5       | 1     | 0     | 1  | 0          | 0     | 5    | 0     | 1      | 1      | 0      | 2 | 2               | 1 | 2      | 2      |          |
| chr3:131414550-131449200  | 34651     | 5       | 2     | 0     | 2  | 1          | 1     | 3    | 0     | 2      | 5      | 1      | 2 | 3               | 1 | 2      | 3      |          |
| chr1:89521625-89559825    | 38201     | 5       | 2     | 1     | 2  | 1          | 1     | 2    | 1     | 2      | 4      | 1      | 5 | 3               | 1 | 5      | 3      |          |
| chr8:96278825-96304600    | 25776     | 5       | 1     | 0     | 2  | 1          | 0     | 5    | 0     | 1      | 1      | 0      | 1 | 1               | 0 | 1      | 1      |          |
| chr5:42794450-42825750    | 31301     | 5       | 3     | 1     | 2  | 2          | 4     | 2    | 1     | 1      | 4      | 2      | 4 | 5               | 1 | 4      | 5      |          |
| chr12:68755950-68789750   | 33801     | 5       | 3     | 3     | 4  | 2          | 4     | 3    | 1     | 4      | 5      | 3      | 3 | 3               | 3 | 5      | 3      |          |
| chr2:37838875-37869900    | 31026     | 5       | 2     | 1     | 2  | 0          | 1     | 1    | 1     | 5      | 1      | 3      | 1 | 1               | 1 | 1      | 1      |          |
| chr8:117182000-117203125  | 21126     | 5       | 1     | 1     | 1  | 0          | 0     | 0    | 0     | 1      | 5      | 0      | 0 | 0               | 0 | 0      | 1      |          |
| chr1:201273200-201284425  | 11226     | 5       | 1     | 0     | 1  | 1          | 5     | 1    | 0     | 0      | 0      | 4      | 0 | 0               | 0 | 0      | 2      |          |
| chr13:111594475-111683250 | 88776     | 5       | 2     | 2     | 3  | 1          | 2     | 2    | 1     | 3      | 3      | 1      | 3 | 5               | 1 | 3      | 5      |          |
| chr6:27771225-27791475    | 20251     | 5       | 2     | 1     | 3  | 1          | 1     | 1    | 0     | 2      | 5      | 1      | 4 | 2               | 1 | 4      | 2      |          |
| chr2:134424550-134510625  | 86076     | 5       | 2     | 2     | 2  | 5          | 2     | 1    | 1     | 1      | 2      | 1      | 2 | 4               | 1 | 2      | 4      |          |
| chr5:142064125-142106675  | 42551     | 5       | 2     | 2     | 3  | 2          | 1     | 2    | 1     | 4      | 2      | 1      | 5 | 2               | 1 | 5      | 2      |          |
| chr12:92933675-92975575   | 41901     | 5       | 3     | 2     | 5  | 2          | 3     | 4    | 1     | 3      | 5      | 1      | 4 | 3               | 1 | 4      | 3      |          |
| chr2:53960400-53920900    | 14501     | 5       | 3     | 2     | 2  | 2          | 3     | 4    | 1     | 4      | 5      | 4      | 4 | 3               | 1 | 4      | 3      |          |
| chr6:155702975-155724025  | 21051     | 5       | 2     | 1     | 3  | 1          | 1     | 4    | 0     | 2      | 5      | 1      | 3 | 3               | 1 | 3      | 3      |          |
| chrX:38748625-38829075    | 80451     | 5       | 2     | 1     | 2  | 1          | 1     | 3    | 0     | 2      | 5      | 1      | 2 | 4               | 1 | 2      | 4      |          |
| chr7:15034875-15075100    | 40226     | 5       | 3     | 3     | 4  | 2          | 2     | 5    | 2     | 2      | 4      | 1      | 3 | 3               | 1 | 3      | 3      |          |
| chr8:67466625-67481800    | 15176     | 5       | 2     | 1     | 1  | 1          | 1     | 5    | 2     | 1      | 2      | 1      | 1 | 1               | 1 | 5      | 1      |          |
| chr5:133864950-133875950  | 11001     | 5       | 1     | 1     | 5  | 1          | 0     | 1    | 0     | 1      | 0      | 1      | 1 | 1               | 1 | 1      | 1      |          |
| chr1:91072125-91085975    | 13851     | 5       | 1     | 0     | 1  | 1          | 2     | 1    | 1     | 1      | 5      | 0      | 1 | 1               | 1 | 1      | 1      |          |
| chr4:35648950-35702775    | 53826     | 5       | 2     | 1     | 4  | 1          | 2     | 2    | 1     | 4      | 1      | 1      | 5 | 2               | 1 | 5      | 2      |          |
| chr5:138990975-139005450  | 14476     | 5       | 2     | 0     | 4  | 1          | 0     | 2    | 0     | 1      | 3      | 1      | 5 | 1               | 1 | 5      | 1      |          |
| chr6:4111525-4130600      | 19076     | 5       | 1     | 1     | 2  | 1          | 1     | 1    | 0     | 1      | 1      | 1      | 1 | 5               | 1 | 1      | 5      |          |
| chr10:126423300-126430700 | 7401      | 5       | 2     | 1     | 3  | 1          | 3     | 2    | 0     | 2      | 5      | 1      | 3 | 4               | 1 | 3      | 4      |          |
| chr2:84550150-84567200    | 17051     | 5       | 2     | 1     | 3  | 1          | 1     | 5    | 1     | 1      | 2      | 1      | 2 | 1               | 2 | 1      | 2      |          |
| chr2:47589325-47600350    | 11026     | 5       | 2     | 0     | 1  | 1          | 5     | 2    | 0     | 1      | 5      | 1      | 1 | 3               | 1 | 3      | 3      |          |
| chr2:120176200-120227875  | 51076     | 5       | 3     | 2     | 3  | 1          | 2     | 4    | 0     | 2      | 5      | 1      | 3 | 5               | 1 | 3      | 5      |          |
| chr5:149961075-149975750  | 14676     | 5       | 1     | 1     | 5  | 1          | 0     | 1    | 0     | 1      | 1      | 1      | 1 | 0               | 1 | 1      | 0      |          |
| chr13:29782300-29797600   | 15301     | 5       | 2     | 2     | 2  | 1          | 1     | 2    | 0     | 3      | 4      | 1      | 5 | 1               | 1 | 5      | 1      |          |
| chr1:191511500-191522500  | 11001     | 5       | 2     | 3     | 1  | 2          | 2     | 3    | 1     | 3      | 3      | 5      | 4 | 1               | 1 | 4      | 1      |          |
| chr13:26522125-26538050   | 15926     | 5       | 2     | 1     | 2  | 1          | 0     | 2    | 0     | 5      | 2      | 1      | 4 | 1               | 1 | 4      | 1      |          |
| chr5:141603100-141658125  | 55026     | 5       | 3     | 2     | 5  | 2          | 2     | 4    | 2     | 4      | 4      | 1      | 4 | 2               | 1 | 4      | 2      |          |
| chr10:44150000-44171575   | 21576     | 5       | 2     | 3     | 3  | 2          | 1     | 2    | 0     | 1      | 1      | 1      | 5 | 1               | 1 | 5      | 1      |          |
| chr6:27484175-27507175    | 23001     | 5       | 2     | 3     | 2  | 1          | 3     | 2    | 0     | 5      | 3      | 2      | 2 | 3               | 1 | 2      | 3      |          |
| chr11:37861200-37931225   | 70026     | 5       | 2     | 1     | 2  | 1          | 1     | 1    | 0     | 1      | 5      | 1      | 2 | 2               | 1 | 2      | 2      |          |
| chr14:76534800-76551800   | 17001     | 5       | 1     | 1     | 1  | 1          | 1     | 1    | 0     | 2      | 0      | 1      | 5 | 0               | 1 | 5      | 0      |          |
| chr5:114562825-114570725  | 7901      | 5       | 2     | 2     | 2  | 2          | 3     | 2    | 1     | 2      | 3      | 3      | 5 | 3               | 1 | 5      | 3      |          |
| chr8:55512850-55528575    | 15726     | 5       | 1     | 1     | 1  | 0          | 0     | 1    | 0     | 1      | 1      | 0      | 5 | 1               | 1 | 0      | 5      |          |
| chr6:43923350-44037900    | 114551    | 5       | 2     | 2     | 3  | 1          | 2     | 3    | 1     | 3      | 5      | 1      | 4 | 3               | 1 | 4      | 3      |          |
| chr1:84662925-84675450    | 12526     | 5       | 1     | 1     | 0  | 1          | 0     | 2    | 0     | 1      | 5      | 1      | 1 | 1               | 1 | 1      | 1      |          |
| chr12:124248075-124327650 | 79576     | 5       | 2     | 1     | 3  | 2          | 5     | 1    | 0     | 2      | 3      | 1      | 2 | 4               | 1 | 2      | 4      |          |
| chr2:174393650-174464925  | 71276     | 5       | 3     | 1     | 5  | 2          | 2     | 4    | 1     | 3      | 4      | 2      | 4 | 3               | 1 | 4      | 3      |          |
| chr6:74607850-74640200    | 32351     | 5       | 3     | 2     | 4  | 2          | 1     | 3    | 1     | 5      | 3      | 1      | 3 | 3               | 1 | 3      | 3      |          |
| chr14:33403725-33434925   | 31201     | 5       | 2     | 1     | 5  | 2          | 1     | 3    | 1     | 3      | 3      | 2      | 3 | 2               | 1 | 3      | 2      |          |
| chr12:129125675-129208050 | 82376     | 5       | 3     | 2     | 5  | 2          | 2     | 2    | 1     | 3      | 5      | 2      | 3 | 3               | 1 | 3      | 3      |          |
| chr18:33500650-33506675   | 50026     | 5       | 2     | 1     | 3  | 1          | 2     | 1    | 0     | 2      | 5      | 1      | 3 | 2               | 1 | 3      | 2      |          |
| chr7:5019825-50260725     | 62201     | 5       | 2     | 1     | 3  | 1          | 1     | 3    | 1     | 2      | 5      | 1      | 3 | 3               | 1 | 3      | 3      |          |
| chr8:86963950-87054175    | 90226     | 5       | 3     | 2     | 4  | 2          | 2     | 3    | 1     | 3      | 5      | 2      | 3 | 3               | 1 | 3      | 3      |          |
| chr4:128977825-128988500  | 10676     | 5       | 2     | 0     | 1  | 4          | 1     | 5    | 4     | 1      | 1      | 1      | 1 | 1               | 1 | 1      | 1      |          |
| chr10:17290425-17301825   | 11401     | 5       | 1     | 1     | 1  | 0          | 0     | 1    | 0     | 2      | 2      | 0      | 5 | 1               | 1 | 1      | 1      |          |
| chr9:36392125-36402600    | 10476     | 5       | 2     | 1     | 2  | 1          | 1     | 3    | 1     | 2      | 3      | 1      | 5 | 3               | 1 | 5      | 3      |          |
| chr8:16431250-16489400    | 58151     | 5       | 2     | 5     | 2  | 1          | 0     | 4    | 0     | 5      | 1      | 1      | 2 | 4               | 1 | 2      | 4      |          |
| chrX:40136950-40206350    | 69401     | 5       | 2     | 1     | 4  | 1          | 1     | 2    | 1     | 3      | 5      | 2      | 3 | 2               | 1 | 3      | 2      |          |
| chr7:124655325-124692375  | 37051     | 5       | 3     | 1     | 4  | 2          | 2     | 4    | 1     | 3      | 5      | 1      | 4 | 2               | 1 | 4      | 2      |          |
| chr22:26399650-26467825   | 68176     | 5       | 2     | 1     | 4  | 2          | 1     | 2    | 1     | 5      | 2      | 3      | 2 | 2               | 1 | 2      | 2      |          |
| chr2:235183250-235262900  | 79651     | 5       | 2     | 1     | 3  | 1          | 1     | 2    | 5     | 3      | 3      | 1      | 2 | 3               | 1 | 2      | 3      |          |
| chr4:76679425-76695050    | 15626     | 5       | 3     | 3     | 1  | 2          | 2     | 4    | 1     | 2      | 5      | 2      | 4 | 3               | 1 | 4      | 3      |          |
| chr8:125829300-125904725  | 75426     | 5       | 3     | 2     | 4  | 2          | 1     | 3    | 1     | 3      | 5      | 2      | 4 | 3               | 1 | 4      | 3      |          |
| chr11:76132025-76162975   | 30951     | 5       | 1     | 2     | 1  | 0          | 0     | 5    | 1     | 0      | 2      | 0      | 1 | 1               | 1 | 1      | 1      |          |
| chr13:3779325-37804375    | 25051     | 5       | 2     | 1     | 2  | 1          | 0     | 5    | 2     | 2      | 3      | 0      | 2 | 2               | 1 | 2      | 2      |          |
| chr12:7445225-74455500    | 10276     | 5       | 1     | 2     | 1  | 1          | 1     | 1    | 0     | 5      | 1      | 1      | 3 | 2               | 1 | 3      | 2      |          |
| chr14:103403900-103436425 | 32526     | 5       | 1     | 1     | 5  | 1          | 1     | 2    | 1     | 2      | 1      | 0      | 2 | 1               | 1 | 0      | 2      |          |
| chr4:10302925-10319675    | 16751     | 5       | 1     | 0     | 1  | 0          | 0     | 5    | 0     | 0      | 0      | 0      | 1 | 0               | 0 | 1      | 0      |          |
| chrX:55818100-55829600    | 11501     | 5       | 2     | 1     | 1  | 1          | 1     | 3    | 0     | 1      | 5      | 1      | 4 | 2               | 1 | 4      | 2      |          |
| chr7:61383725-61394675    | 10951     | 5       | 1     | 0     | 5  | 0          | 0     | 0    | 0     | 0      | 0      | 0      | 0 | 0               | 0 | 0      | 0      |          |
| chrX:21818800-21841025    | 22226     | 5       | 2     | 2     | 2  | 2          | 2     | 3    | 1     | 2      | 3      | 5      | 4 | 2               | 1 | 4      | 2      |          |
| chr2:48237675-48250500    | 12826     | 5       | 2     | 1     | 2  | 1          | 1     | 2    | 1     | 2      | 5      | 2      | 3 | 3               | 1 | 3      | 3      |          |
| chr3:111003125-111018900  | 15776     | 5       | 1     | 0     | 1  | 1          | 0     | 5    | 0     | 0      | 0      | 0      | 0 | 0               | 1 | 1      | 0      |          |
| chr5:54198250-54243900    | 45651     | 5       | 2     | 1     | 1  | 1          | 1     | 5    | 0     | 1      | 3      | 1      | 2 | 2               | 1 | 2      | 2      |          |
| chr12:4829050-4848050     | 11801     | 5       | 1     | 0     | 1  | 1          | 5     | 0    | 0     | 1      | 1      | 0      | 1 | 0               | 1 | 0      | 1      |          |
| chr14:104347300-104362400 | 15101     | 5       | 2     | 1     | 5  | 1          | 1     | 2    | 1     | 4      | 3      | 1      | 3 | 2               | 1 | 3      | 2      |          |
| chr7:149967450-150001750  | 34301     | 4       | 2     | 1     | 2  | 1          | 1     | 1    | 0     | 2      | 3      | 1      | 4 |                 |   |        |        |          |

| location                  | span (nt) | max  |         | hypothalam |       |    |        |       |      |       |          |                 |         |        | skeletal muscle | spleen | testes | Comments |
|---------------------------|-----------|------|---------|------------|-------|----|--------|-------|------|-------|----------|-----------------|---------|--------|-----------------|--------|--------|----------|
|                           |           | mean | adipose | colon      | heart | us | kidney | liver | lung | ovary | pancreas | small intestine | stomach | thymus |                 |        |        |          |
| chr11:11096775-113107650  | 20876     | 4    | 2       | 2          | 1     | 1  | 1      | 2     | 1    | 2     | 1        | 2               | 4       | 3      | 3               | 3      | 3      |          |
| chr11:28328725-28349150   | 20426     | 4    | 2       | 2          | 1     | 1  | 1      | 1     | 3    | 1     | 3        | 4               | 2       | 3      | 4               | 4      | 4      |          |
| chr17:37055675-37077700   | 22026     | 4    | 1       | 0          | 4     | 0  | 1      | 1     | 1    | 0     | 1        | 1               | 0       | 1      | 1               | 1      | 1      |          |
| chr5:5410650-5437825      | 27176     | 4    | 2       | 1          | 2     | 1  | 2      | 3     | 1    | 2     | 4        | 1               | 3       | 4      | 4               | 4      | 4      |          |
| chr4:11108100-11128250    | 20151     | 4    | 2       | 1          | 2     | 1  | 1      | 1     | 3    | 0     | 2        | 2               | 1       | 3      | 4               | 4      | 4      |          |
| chr1:154326000-154341900  | 15901     | 4    | 1       | 1          | 3     | 1  | 1      | 1     | 1    | 0     | 1        | 4               | 1       | 1      | 1               | 1      | 1      |          |
| chr21:20864700-20924525   | 59826     | 4    | 2       | 2          | 3     | 1  | 1      | 1     | 3    | 0     | 2        | 4               | 2       | 2      | 2               | 2      | 2      |          |
| chr3:135322675-135340275  | 17601     | 4    | 2       | 4          | 1     | 2  | 1      | 2     | 0    | 1     | 4        | 3               | 4       | 2      | 4               | 4      | 4      |          |
| chr15:64997350-65018875   | 21526     | 4    | 2       | 4          | 1     | 2  | 0      | 3     | 0    | 2     | 2        | 1               | 1       | 2      | 1               | 2      | 2      |          |
| chr13:29572725-29629450   | 56726     | 4    | 2       | 2          | 4     | 1  | 1      | 1     | 1    | 2     | 3        | 3               | 1       | 2      | 2               | 2      | 2      |          |
| chr2:120936025-121024600  | 87676     | 4    | 2       | 2          | 4     | 1  | 2      | 2     | 1    | 2     | 4        | 1               | 4       | 2      | 3               | 3      | 3      |          |
| chr13:98845000-98872975   | 27976     | 4    | 3       | 2          | 4     | 1  | 2      | 2     | 1    | 3     | 3        | 4               | 2       | 4      | 3               | 3      | 3      |          |
| chr4:41790675-41800725    | 10051     | 4    | 2       | 1          | 1     | 1  | 1      | 3     | 1    | 3     | 3        | 4               | 2       | 4      | 2               | 2      | 2      |          |
| chr20:56582075-56648350   | 66276     | 4    | 2       | 1          | 3     | 1  | 2      | 4     | 0    | 1     | 2        | 0               | 1       | 2      | 0               | 1      | 2      |          |
| chr4:24423850-24436150    | 12301     | 4    | 2       | 2          | 2     | 4  | 4      | 2     | 1    | 2     | 3        | 1               | 2       | 2      | 2               | 2      | 2      |          |
| chr4:25707575-25774725    | 67151     | 4    | 2       | 3          | 4     | 2  | 2      | 2     | 0    | 4     | 3        | 2               | 2       | 3      | 3               | 3      | 3      |          |
| chr9:123914275-123933950  | 19676     | 4    | 1       | 1          | 2     | 0  | 0      | 4     | 0    | 1     | 1        | 1               | 1       | 1      | 1               | 1      | 1      |          |
| chr10:89817350-89828825   | 11476     | 4    | 1       | 0          | 0     | 0  | 0      | 0     | 0    | 1     | 0        | 0               | 4       | 0      | 4               | 0      | 0      |          |
| chr5:171206800-171220925  | 14126     | 4    | 2       | 2          | 2     | 2  | 2      | 2     | 0    | 2     | 3        | 1               | 4       | 1      | 2               | 1      | 2      |          |
| chr10:17544300-17574475   | 30176     | 4    | 2       | 1          | 2     | 1  | 1      | 2     | 1    | 4     | 3        | 1               | 2       | 2      | 2               | 2      | 2      |          |
| chr5:141712700-141725675  | 12976     | 4    | 1       | 1          | 2     | 1  | 1      | 1     | 0    | 4     | 1        | 0               | 1       | 2      | 1               | 2      | 2      |          |
| chr12:1511350-1531175     | 19826     | 4    | 2       | 1          | 4     | 1  | 1      | 1     | 0    | 2     | 4        | 1               | 1       | 2      | 1               | 2      | 2      |          |
| chr2:8625475-8656675      | 31201     | 4    | 1       | 0          | 4     | 0  | 0      | 2     | 1    | 1     | 1        | 0               | 2       | 1      | 2               | 1      | 2      |          |
| chr1:33624900-33640125    | 15226     | 4    | 2       | 1          | 2     | 2  | 1      | 2     | 0    | 2     | 3        | 2               | 4       | 1      | 1               | 1      | 1      |          |
| chr2:68184950-68197450    | 12501     | 4    | 2       | 1          | 1     | 1  | 2      | 1     | 0    | 1     | 4        | 2               | 2       | 2      | 3               | 3      | 3      |          |
| chr2:238241425-238260675  | 19251     | 4    | 2       | 1          | 2     | 3  | 1      | 4     | 1    | 4     | 4        | 3               | 4       | 1      | 1               | 1      | 1      |          |
| chr11:109591300-109599000 | 7701      | 4    | 2       | 1          | 1     | 1  | 1      | 1     | 0    | 2     | 4        | 3               | 2       | 1      | 1               | 1      | 1      |          |
| chr5:67711025-67754775    | 43751     | 4    | 1       | 1          | 1     | 1  | 1      | 2     | 4    | 1     | 2        | 0               | 1       | 2      | 0               | 1      | 2      |          |
| chr8:94942275-94989225    | 46951     | 4    | 1       | 1          | 2     | 1  | 0      | 1     | 0    | 1     | 2        | 1               | 2       | 1      | 2               | 1      | 2      |          |
| chr1:27717600-27729175    | 11576     | 4    | 2       | 0          | 3     | 1  | 0      | 1     | 0    | 1     | 3        | 4               | 2       | 1      | 1               | 1      | 1      |          |
| chr6:44054725-44073196    | 18472     | 4    | 1       | 1          | 2     | 1  | 1      | 1     | 0    | 1     | 1        | 4               | 1       | 4      | 1               | 0      | 1      |          |
| chr1:161547975-161558200  | 10226     | 4    | 2       | 2          | 1     | 1  | 1      | 3     | 0    | 1     | 4        | 1               | 3       | 3      | 3               | 3      | 3      |          |
| chr1:197692000-197775950  | 83951     | 4    | 2       | 3          | 3     | 2  | 1      | 3     | 1    | 3     | 4        | 1               | 3       | 3      | 3               | 3      | 3      |          |
| chr12:55531725-55548275   | 16551     | 4    | 1       | 1          | 1     | 1  | 0      | 1     | 1    | 1     | 1        | 4               | 1       | 1      | 1               | 1      | 1      |          |
| chr13:35836025-35848350   | 12326     | 4    | 1       | 0          | 1     | 1  | 1      | 1     | 0    | 1     | 4        | 0               | 1       | 1      | 1               | 1      | 1      |          |
| chr12:108546875-108559575 | 12701     | 4    | 1       | 0          | 4     | 1  | 1      | 1     | 0    | 1     | 1        | 1               | 2       | 1      | 1               | 1      | 1      |          |
| chr6:15803725-15840100    | 36376     | 4    | 2       | 1          | 4     | 1  | 1      | 3     | 1    | 2     | 3        | 1               | 2       | 4      | 1               | 2      | 4      |          |
| chr1:237448850-237518300  | 69451     | 4    | 2       | 1          | 3     | 0  | 0      | 2     | 1    | 2     | 2        | 1               | 2       | 4      | 1               | 2      | 4      |          |
| chr4:65264625-65308600    | 43976     | 4    | 2       | 2          | 4     | 1  | 1      | 3     | 1    | 2     | 4        | 2               | 3       | 1      | 3               | 3      | 3      |          |
| chr5:167625475-167637500  | 12026     | 4    | 1       | 1          | 2     | 1  | 1      | 4     | 1    | 4     | 1        | 0               | 1       | 1      | 1               | 1      | 1      |          |
| chr8:121151225-121164350  | 13126     | 4    | 1       | 1          | 1     | 1  | 0      | 1     | 0    | 0     | 1        | 4               | 1       | 1      | 1               | 1      | 1      |          |
| chr12:4015975-4071825     | 55851     | 4    | 2       | 1          | 3     | 1  | 1      | 3     | 1    | 2     | 4        | 1               | 3       | 3      | 3               | 3      | 3      |          |
| chr12:59079125-59174275   | 95151     | 4    | 2       | 1          | 3     | 2  | 1      | 3     | 1    | 3     | 4        | 2               | 3       | 3      | 3               | 3      | 3      |          |
| chr2:127379700-127418650  | 42951     | 4    | 2       | 1          | 1     | 1  | 2      | 1     | 2    | 4     | 1        | 4               | 1       | 4      | 1               | 4      | 4      |          |
| chr8:37300175-37362850    | 62676     | 4    | 2       | 2          | 3     | 1  | 1      | 2     | 4    | 1     | 3        | 1               | 1       | 3      | 1               | 3      | 3      |          |
| chr14:95273700-95291125   | 17426     | 4    | 1       | 0          | 1     | 0  | 1      | 1     | 1    | 1     | 1        | 0               | 4       | 1      | 1               | 1      | 1      |          |
| chr16:83714775-83742000   | 27226     | 4    | 2       | 1          | 4     | 1  | 1      | 3     | 0    | 1     | 2        | 1               | 4       | 1      | 4               | 1      | 4      |          |
| chr5:81999675-82050175    | 50501     | 4    | 2       | 1          | 2     | 2  | 1      | 3     | 0    | 4     | 2        | 1               | 1       | 2      | 1               | 2      | 2      |          |
| chr6:132493825-132536700  | 42876     | 4    | 2       | 2          | 2     | 1  | 2      | 2     | 1    | 2     | 4        | 0               | 3       | 4      | 1               | 4      | 4      |          |
| chr12:46439750-46452350   | 12601     | 4    | 1       | 1          | 1     | 1  | 1      | 4     | 0    | 1     | 4        | 0               | 1       | 1      | 1               | 1      | 1      |          |
| chr5:40478375-40500725    | 22351     | 4    | 2       | 1          | 3     | 2  | 1      | 2     | 1    | 2     | 4        | 1               | 4       | 1      | 4               | 3      | 3      |          |
| chr10:102320175-102331900 | 11726     | 4    | 1       | 0          | 1     | 1  | 4      | 0     | 0    | 2     | 1        | 1               | 1       | 1      | 1               | 1      | 1      |          |
| chr4:285700-301175        | 15476     | 4    | 2       | 1          | 3     | 2  | 2      | 4     | 1    | 1     | 4        | 1               | 4       | 1      | 4               | 4      | 4      |          |
| chrX:111827950-111846700  | 18751     | 4    | 2       | 1          | 2     | 1  | 1      | 2     | 0    | 1     | 4        | 2               | 2       | 3      | 3               | 3      | 3      |          |
| chr13:104871700-104904225 | 32526     | 4    | 1       | 1          | 4     | 1  | 0      | 1     | 0    | 1     | 3        | 0               | 0       | 1      | 1               | 1      | 1      |          |
| chr10:44057525-44069225   | 11701     | 4    | 2       | 1          | 2     | 1  | 1      | 2     | 0    | 2     | 3        | 1               | 2       | 4      | 1               | 2      | 4      |          |
| chr2:28505600-28531825    | 26226     | 4    | 1       | 1          | 2     | 0  | 0      | 1     | 0    | 1     | 1        | 4               | 1       | 1      | 1               | 1      | 1      |          |
| chr6:131076150-131124300  | 48151     | 4    | 2       | 1          | 2     | 1  | 1      | 3     | 1    | 3     | 4        | 1               | 4       | 3      | 3               | 3      | 3      |          |
| chrX:57018625-57030000    | 11376     | 4    | 2       | 1          | 2     | 1  | 1      | 3     | 1    | 1     | 4        | 1               | 3       | 1      | 3               | 1      | 3      |          |
| chr5:158747225-158807525  | 60301     | 4    | 2       | 1          | 3     | 1  | 1      | 2     | 0    | 1     | 2        | 1               | 4       | 3      | 3               | 3      | 3      |          |
| chr3:195232225-195254025  | 18801     | 4    | 1       | 1          | 1     | 1  | 1      | 1     | 1    | 3     | 1        | 1               | 1       | 1      | 1               | 1      | 1      |          |
| chr14:98364250-98474750   | 110501    | 4    | 2       | 1          | 4     | 1  | 2      | 3     | 2    | 2     | 4        | 1               | 3       | 2      | 1               | 2      | 2      |          |
| chr12:12775375-12786225   | 10851     | 4    | 1       | 1          | 2     | 0  | 1      | 1     | 0    | 1     | 4        | 0               | 3       | 1      | 1               | 1      | 1      |          |
| chr2:62229225-62239350    | 10126     | 4    | 2       | 1          | 2     | 1  | 1      | 3     | 1    | 1     | 4        | 2               | 4       | 2      | 4               | 2      | 2      |          |
| chr2:202531900-202562225  | 30326     | 4    | 1       | 1          | 2     | 1  | 1      | 1     | 2    | 4     | 1        | 0               | 1       | 1      | 1               | 1      | 1      |          |
| chr18:69451350-69507600   | 56251     | 4    | 2       | 3          | 4     | 3  | 1      | 3     | 1    | 3     | 3        | 2               | 2       | 3      | 3               | 3      | 3      |          |
| chr9:5564750-5571550      | 6801      | 4    | 2       | 1          | 2     | 1  | 2      | 1     | 0    | 1     | 1        | 4               | 3       | 2      | 1               | 2      | 2      |          |
| chr10:114927875-114959800 | 31926     | 4    | 2       | 1          | 2     | 1  | 1      | 2     | 1    | 1     | 2        | 1               | 4       | 2      | 1               | 4      | 2      |          |
| chr11:10696225-10707675   | 11451     | 4    | 2       | 1          | 2     | 2  | 1      | 2     | 0    | 2     | 1        | 1               | 4       | 2      | 1               | 4      | 2      |          |
| chr7:86800800-86810825    | 10026     | 4    | 2       | 1          | 1     | 2  | 2      | 3     | 1    | 2     | 2        | 1               | 4       | 2      | 1               | 4      | 2      |          |
| chr21:43744000-43763000   | 19001     | 4    | 1       | 1          | 1     | 0  | 1      | 1     | 0    | 1     | 2        | 1               | 0       | 4      | 1               | 0      | 4      |          |
| chr3:31131575-31154225    | 22651     | 4    | 1       | 0          | 1     | 0  | 1      | 1     | 0    | 1     | 4        | 0               | 0       | 1      | 1               | 1      | 1      |          |
| chr4:119994100-120020550  | 26451     | 4    | 2       | 1          | 2     | 1  | 1      | 2     | 1    | 2     | 4        | 1               | 4       | 3      | 3               | 3      | 3      |          |
| chrX:42991675-43019825    | 28151     | 4    | 2       | 0          | 2     | 1  | 1      | 2     | 0    | 1     | 4        | 1               | 2       | 2      | 2               | 2      | 2      |          |
| chr2:57876000-57907450    | 31451     | 4    | 1       | 1          | 1     | 1  | 0      | 0     | 0    | 1     | 3        | 0               | 4       | 3      | 3               | 3      | 3      |          |
| chr10:54673950-54691500   | 17551     | 4    | 1       | 1          | 1     | 1  | 0      | 1     | 1    | 4     | 1        | 1               | 0       | 1      | 1               | 1      | 1      |          |
| chr11:18370050-18390050   | 20001     | 4    | 2       | 1          | 1     | 1  | 1      | 2     | 0    | 2     | 2        | 1               | 3       | 4      | 1               | 3      | 4      |          |
| chr10:44839900-44857575   | 27676     | 4    | 2       | 3          | 2     | 1  | 2      | 2     | 2    | 2     | 4        | 0               | 2       | 3      | 3               | 3      | 3      |          |
| chr14:40496250-40534675   | 38426     | 4    | 2       | 1          | 2     | 1  | 1      | 2     | 1    | 2     | 4        | 1               | 3       | 2      | 2               | 2      | 2      |          |
| chr16:31363000-31416375   | 53376     | 4    | 2       | 1          | 3     | 1  | 2      | 2     | 1    | 3     | 4        | 2               | 2       | 2      | 2               | 2      | 2      |          |
| chr9:5300525-5316625      | 16101     | 4    | 2       | 2          | 3     | 2  | 3      | 3     | 1    | 2     | 4        | 1               | 3       | 2      | 1               | 3      | 2      |          |
| chrX:124133150-124148375  | 15226     | 4    | 1       | 0          | 1     | 0  | 1      | 4     | 0    | 1     | 0        | 0               | 1       | 1      | 1               | 1      | 1      |          |
| chr1:198597975-198611175  | 13201     | 4    | 1       | 1          | 1     | 0  | 1      | 2     | 1    | 3     | 1        | 1               | 4       | 1      | 1               | 1      | 1      |          |
| chr1:203671525-203684250  | 12726     | 4    | 1       | 0          | 0     | 0  | 0      | 1     | 0    | 1     | 1        | 0               | 0       | 4      | 1               | 0      | 4      |          |
| chr1:19738200-9748525     | 10326     | 4    | 2       | 2          | 3     | 1  | 1      | 2     | 0    | 2     | 4        | 1               | 2       | 2      | 2               | 2      | 2      |          |
| chr14:55229950-55253225   | 23276     | 4    | 2       | 1          | 1     | 1  | 1      | 2     | 0    | 1     | 1        | 4               | 3       | 2      | 3               | 2      | 3      |          |
| chr10:3964425-3977400     | 12976     | 4    | 1       | 0          | 1     | 1  | 0      | 0     | 0    | 0     | 1        | 1               | 1       | 1      | 1               | 1      | 1      |          |
| chr12:28607450-28619725   | 12276     | 4    | 2       | 3          | 1     | 2  | 1      | 2     | 1    | 1     | 3        | 3               | 4       | 1      | 4               | 1      | 4      |          |
| chr10:80394300-80443425   | 49126     | 4    | 2       | 3          | 4     | 0  |        |       |      |       |          |                 |         |        |                 |        |        |          |

| location                 | span (nt) | max | mean | hypothalam |       |       |    |        |       | skeletal muscle |       |        |        | spleen | testes | Comments |
|--------------------------|-----------|-----|------|------------|-------|-------|----|--------|-------|-----------------|-------|--------|--------|--------|--------|----------|
|                          |           |     |      | adipose    | colon | heart | us | kidney | liver | lung            | ovary | muscle | muscle |        |        |          |
| chr16:83762925-83776250  | 13326     | 3   | 1    | 0          | 2     | 0     | 0  | 2      | 0     | 0               | 3     | 2      | 1      | 1      | 1      |          |
| chr2:158472500-158484150 | 11651     | 3   | 1    | 1          | 1     | 0     | 1  | 2      | 0     | 1               | 3     | 0      | 1      | 1      | 1      |          |
| chr10:77993900-78008175  | 14276     | 3   | 1    | 1          | 0     | 1     | 0  | 2      | 0     | 1               | 3     | 0      | 3      | 2      | 1      |          |
| chr6:143711975-143724400 | 12426     | 3   | 2    | 2          | 1     | 1     | 1  | 3      | 1     | 1               | 3     | 0      | 2      | 1      | 1      |          |
| chr12:10989650-109871275 | 11626     | 3   | 1    | 0          | 0     | 0     | 3  | 0      | 0     | 1               | 0     | 3      | 0      | 1      | 1      |          |
| chr2:128803850-128856725 | 52876     | 3   | 1    | 1          | 2     | 1     | 1  | 2      | 1     | 1               | 2     | 0      | 3      | 1      | 1      |          |
| chr17:60528775-60538900  | 10126     | 3   | 2    | 1          | 3     | 1     | 1  | 1      | 2     | 3               | 2     | 2      | 1      | 2      | 1      |          |
| chr4:37438825-37458300   | 19476     | 3   | 1    | 1          | 2     | 0     | 0  | 0      | 0     | 1               | 1     | 0      | 3      | 0      | 1      |          |
| chr4:56497950-56508950   | 11001     | 3   | 1    | 1          | 0     | 1     | 1  | 1      | 1     | 1               | 1     | 0      | 3      | 1      | 1      |          |
| chr16:83112375-83139100  | 26926     | 3   | 1    | 1          | 3     | 1     | 1  | 1      | 1     | 3               | 1     | 2      | 1      | 2      | 1      |          |
| chr2:188216850-188242950 | 26101     | 3   | 1    | 1          | 3     | 1     | 1  | 1      | 1     | 3               | 2     | 1      | 2      | 3      | 1      |          |
| chr2:231927600-231939325 | 11726     | 3   | 1    | 1          | 2     | 0     | 1  | 1      | 0     | 3               | 1     | 3      | 0      | 0      | 1      |          |
| chr1:82690075-82738225   | 48151     | 3   | 1    | 1          | 1     | 0     | 0  | 1      | 1     | 3               | 0     | 0      | 0      | 2      | 1      |          |
| chr14:72115775-72140300  | 24526     | 3   | 1    | 1          | 1     | 1     | 1  | 1      | 2     | 3               | 2     | 1      | 0      | 1      | 1      |          |
| chr20:29267675-29298475  | 30801     | 3   | 1    | 1          | 3     | 0     | 0  | 1      | 0     | 1               | 0     | 0      | 0      | 0      | 1      |          |
| chr2:104872525-104884550 | 12026     | 3   | 1    | 0          | 2     | 0     | 1  | 3      | 0     | 1               | 0     | 0      | 0      | 0      | 1      |          |
| chr6:91443800-91462575   | 18776     | 3   | 1    | 0          | 0     | 0     | 0  | 0      | 0     | 0               | 0     | 1      | 3      | 0      | 1      |          |
| chr2:128912250-128946725 | 34476     | 3   | 2    | 1          | 1     | 1     | 0  | 3      | 1     | 2               | 3     | 0      | 3      | 2      | 1      |          |
| chr21:10142425-10168325  | 25901     | 3   | 2    | 1          | 3     | 1     | 2  | 2      | 1     | 1               | 2     | 1      | 1      | 2      | 1      |          |
| chr5:142858650-142910425 | 51776     | 3   | 2    | 1          | 3     | 2     | 1  | 3      | 0     | 2               | 3     | 1      | 2      | 2      | 1      |          |
| chr20:1594825-1615675    | 20851     | 3   | 1    | 0          | 1     | 0     | 1  | 1      | 0     | 1               | 1     | 0      | 3      | 0      | 1      |          |
| chr5:86440850-86461100   | 20251     | 3   | 1    | 0          | 1     | 0     | 3  | 0      | 0     | 0               | 0     | 0      | 1      | 0      | 1      |          |
| chr6:164108650-164125500 | 16851     | 3   | 1    | 0          | 0     | 0     | 0  | 0      | 0     | 1               | 0     | 1      | 1      | 3      | 0      |          |
| chr6:126536000-126549075 | 13076     | 3   | 2    | 1          | 1     | 1     | 1  | 3      | 2     | 1               | 3     | 1      | 2      | 2      | 1      |          |
| chr5:78088475-78102000   | 13526     | 3   | 1    | 0          | 1     | 0     | 0  | 3      | 0     | 0               | 1     | 0      | 1      | 1      | 1      |          |
| chr12:91259775-91314700  | 54926     | 3   | 1    | 2          | 1     | 1     | 1  | 2      | 0     | 1               | 2     | 1      | 3      | 1      | 1      |          |
| chr4:57290325-57305175   | 14851     | 3   | 2    | 1          | 2     | 1     | 2  | 2      | 1     | 2               | 2     | 1      | 3      | 2      | 1      |          |
| chr4:14873975-14887950   | 13976     | 3   | 2    | 1          | 2     | 2     | 1  | 3      | 0     | 3               | 3     | 1      | 3      | 2      | 1      |          |
| chr6:56857225-56873850   | 16626     | 3   | 2    | 3          | 3     | 1     | 1  | 2      | 1     | 3               | 3     | 1      | 2      | 2      | 1      |          |
| chr4:84754000-84780025   | 26026     | 3   | 2    | 2          | 3     | 2     | 2  | 3      | 2     | 2               | 3     | 2      | 3      | 2      | 1      |          |
| chr21:39131050-39141200  | 10151     | 3   | 1    | 0          | 1     | 0     | 0  | 0      | 3     | 1               | 1     | 1      | 1      | 1      | 1      |          |
| chr1:231084925-231131050 | 46126     | 3   | 1    | 1          | 3     | 1     | 1  | 1      | 0     | 1               | 2     | 1      | 1      | 1      | 2      |          |
| chr4:24273450-24285525   | 12076     | 3   | 1    | 1          | 1     | 0     | 0  | 0      | 0     | 0               | 0     | 0      | 0      | 0      | 3      |          |
| chr1:157219375-157229975 | 10601     | 3   | 1    | 0          | 1     | 1     | 0  | 1      | 0     | 1               | 0     | 0      | 3      | 0      | 1      |          |
| chrX:43070225-43119975   | 49751     | 3   | 2    | 1          | 2     | 1     | 1  | 2      | 1     | 3               | 3     | 1      | 3      | 1      | 3      |          |
| chr13:72717475-72744200  | 26726     | 3   | 1    | 0          | 3     | 0     | 1  | 1      | 0     | 1               | 2     | 0      | 1      | 1      | 1      |          |
| chr6:135461825-135493175 | 31351     | 3   | 2    | 1          | 3     | 1     | 1  | 1      | 1     | 3               | 3     | 0      | 1      | 1      | 2      |          |
| chr15:89814100-89836700  | 22601     | 3   | 1    | 1          | 1     | 0     | 0  | 3      | 0     | 1               | 2     | 1      | 1      | 1      | 2      |          |
| chr21:32528625-32540925  | 12301     | 3   | 1    | 1          | 1     | 1     | 1  | 1      | 0     | 1               | 3     | 2      | 3      | 1      | 1      |          |
| chr14:50080825-50091175  | 10351     | 3   | 1    | 1          | 2     | 1     | 1  | 3      | 0     | 1               | 2     | 0      | 3      | 1      | 2      |          |
| chrX:70452900-70467450   | 14551     | 3   | 1    | 0          | 3     | 1     | 1  | 2      | 0     | 2               | 3     | 1      | 2      | 2      | 1      |          |
| chr9:117609800-117640825 | 31026     | 3   | 1    | 2          | 2     | 1     | 0  | 1      | 0     | 1               | 1     | 0      | 1      | 3      | 1      |          |
| chr1:110140000-110161150 | 21151     | 3   | 1    | 1          | 1     | 1     | 1  | 1      | 1     | 2               | 3     | 1      | 1      | 1      | 1      |          |
| chr2:67455100-67475300   | 20201     | 3   | 1    | 1          | 1     | 0     | 0  | 2      | 0     | 1               | 3     | 0      | 1      | 1      | 2      |          |
| chr2:145391450-145406075 | 14626     | 3   | 1    | 0          | 0     | 0     | 0  | 0      | 0     | 0               | 0     | 0      | 1      | 0      | 1      |          |
| chr3:120042175-120054600 | 12426     | 3   | 1    | 0          | 1     | 1     | 1  | 3      | 1     | 1               | 1     | 1      | 1      | 3      | 1      |          |
| chr2:47707900-47740825   | 32926     | 3   | 1    | 1          | 3     | 1     | 1  | 2      | 0     | 1               | 2     | 1      | 1      | 1      | 1      |          |
| chr7:115705750-115719100 | 13351     | 3   | 1    | 3          | 0     | 1     | 0  | 0      | 0     | 1               | 1     | 0      | 1      | 1      | 1      |          |
| chr5:120503325-120556975 | 53651     | 3   | 1    | 1          | 1     | 1     | 0  | 1      | 0     | 2               | 2     | 0      | 1      | 1      | 3      |          |
| chr17:13902350-13912750  | 10401     | 3   | 1    | 0          | 1     | 1     | 1  | 1      | 1     | 1               | 3     | 1      | 3      | 0      | 1      |          |
| chr3:156892700-156920200 | 27501     | 3   | 1    | 0          | 3     | 1     | 1  | 2      | 0     | 3               | 1     | 0      | 1      | 1      | 3      |          |
| chr1:180367800-180398625 | 30826     | 3   | 2    | 1          | 2     | 1     | 1  | 1      | 3     | 2               | 2     | 1      | 2      | 3      | 1      |          |
| chr6:140930925-140944025 | 13101     | 3   | 1    | 1          | 0     | 0     | 0  | 0      | 0     | 0               | 3     | 0      | 0      | 0      | 1      |          |
| chr5:126209425-126222425 | 13001     | 3   | 1    | 1          | 2     | 1     | 0  | 1      | 0     | 2               | 1     | 0      | 3      | 1      | 1      |          |
| chr1:38349575-38436300   | 86726     | 3   | 2    | 1          | 3     | 1     | 3  | 2      | 1     | 2               | 2     | 1      | 2      | 3      | 1      |          |
| chr10:63244600-63290375  | 45776     | 3   | 2    | 1          | 3     | 1     | 1  | 2      | 0     | 1               | 2     | 0      | 2      | 3      | 1      |          |
| chr6:163707275-163722675 | 15401     | 3   | 1    | 2          | 3     | 1     | 1  | 1      | 0     | 1               | 2     | 1      | 3      | 1      | 1      |          |
| chr11:68866050-68876750  | 10701     | 3   | 1    | 3          | 1     | 0     | 0  | 0      | 1     | 0               | 0     | 0      | 0      | 0      | 1      |          |
| chr8:17033050-17043750   | 10701     | 3   | 1    | 1          | 1     | 1     | 1  | 1      | 1     | 3               | 1     | 1      | 3      | 2      | 1      |          |
| chr14:65329850-65390700  | 60851     | 3   | 1    | 1          | 3     | 1     | 1  | 3      | 1     | 1               | 2     | 0      | 2      | 2      | 1      |          |
| chr2:129013175-129078275 | 65101     | 3   | 2    | 1          | 3     | 1     | 1  | 3      | 3     | 2               | 1     | 0      | 1      | 1      | 2      |          |
| chr2:19934400-19954800   | 20401     | 3   | 1    | 0          | 1     | 1     | 1  | 3      | 1     | 1               | 2     | 1      | 3      | 1      | 1      |          |
| chr10:11477175-11516650  | 39476     | 3   | 1    | 1          | 2     | 1     | 1  | 2      | 0     | 1               | 3     | 1      | 2      | 2      | 1      |          |
| chrX:16349775-16384450   | 34676     | 3   | 2    | 2          | 3     | 1     | 1  | 1      | 1     | 2               | 2     | 1      | 3      | 2      | 1      |          |
| chr11:12559275-125576425 | 17151     | 3   | 2    | 0          | 2     | 2     | 1  | 2      | 0     | 1               | 2     | 3      | 2      | 2      | 1      |          |
| chr16:85173525-85183625  | 10101     | 3   | 1    | 1          | 3     | 2     | 1  | 3      | 0     | 2               | 1     | 0      | 1      | 2      | 1      |          |
| chr18:71155200-71236250  | 81051     | 3   | 2    | 1          | 3     | 1     | 1  | 2      | 0     | 2               | 3     | 1      | 2      | 3      | 1      |          |
| chr6:48613250-48635850   | 22601     | 3   | 1    | 0          | 1     | 1     | 0  | 1      | 0     | 1               | 3     | 1      | 1      | 1      | 1      |          |
| chr14:95159375-95182150  | 22776     | 3   | 1    | 0          | 2     | 0     | 0  | 1      | 1     | 1               | 1     | 0      | 2      | 3      | 1      |          |
| chr7:135091600-135161700 | 70101     | 3   | 2    | 1          | 3     | 2     | 3  | 2      | 0     | 3               | 2     | 1      | 2      | 2      | 1      |          |
| chr12:3887700-3912800    | 25101     | 3   | 1    | 1          | 0     | 0     | 0  | 0      | 3     | 1               | 0     | 0      | 1      | 1      | 1      |          |
| chrX:12189550-121211000  | 21451     | 3   | 2    | 1          | 1     | 1     | 1  | 2      | 1     | 2               | 3     | 2      | 3      | 2      | 1      |          |
| chr4:75405950-75439100   | 33151     | 3   | 1    | 1          | 1     | 1     | 1  | 1      | 1     | 2               | 3     | 1      | 3      | 2      | 1      |          |
| chr5:5376800-5390800     | 14001     | 3   | 1    | 0          | 1     | 0     | 0  | 1      | 0     | 0               | 3     | 0      | 0      | 0      | 1      |          |
| chr7:14089850-140880350  | 21801     | 3   | 1    | 1          | 1     | 1     | 1  | 1      | 0     | 0               | 3     | 0      | 1      | 2      | 1      |          |
| chr5:6309175-6335000     | 25826     | 3   | 1    | 1          | 0     | 2     | 2  | 2      | 0     | 1               | 3     | 1      | 2      | 2      | 1      |          |
| chr7:152227150-152252575 | 25426     | 3   | 2    | 1          | 3     | 1     | 1  | 3      | 1     | 2               | 2     | 2      | 2      | 1      | 1      |          |
| chr4:47499275-47526100   | 26826     | 3   | 2    | 1          | 2     | 1     | 1  | 2      | 0     | 1               | 3     | 3      | 1      | 2      | 1      |          |
| chr12:92102025-92112725  | 10701     | 3   | 2    | 3          | 2     | 1     | 1  | 1      | 0     | 2               | 2     | 1      | 1      | 2      | 1      |          |
| chr14:61092950-61102975  | 10026     | 3   | 1    | 1          | 1     | 1     | 0  | 1      | 1     | 3               | 1     | 0      | 2      | 1      | 1      |          |
| chr10:79477000-79490450  | 13451     | 3   | 1    | 1          | 2     | 1     | 0  | 1      | 0     | 2               | 1     | 0      | 2      | 3      | 1      |          |
| chr9:109835775-109863175 | 27401     | 3   | 1    | 0          | 0     | 1     | 0  | 0      | 0     | 1               | 1     | 0      | 1      | 1      | 3      |          |
| chr5:171169700-171196400 | 26701     | 3   | 2    | 1          | 3     | 1     | 0  | 2      | 0     | 2               | 2     | 2      | 3      | 2      | 1      |          |
| chr5:36449325-36493325   | 44001     | 3   | 2    | 1          | 3     | 1     | 2  | 3      | 1     | 3               | 2     | 2      | 1      | 2      | 2      |          |
| chr8:117452225-117463525 | 11301     | 3   | 1    | 1          | 2     | 1     | 1  | 1      | 0     | 1               | 3     | 1      | 2      | 1      | 1      |          |
| chrX:128656625-128669100 | 12476     | 3   | 1    | 0          | 1     | 0     | 1  | 1      | 3     | 1               | 0     | 1      | 1      | 1      | 1      |          |
| chr2:856250-875200       | 18951     | 3   | 1    | 0          | 1     | 0     | 1  | 2      | 0     | 0               | 3     | 0      | 1      | 3      | 0      |          |
| chr10:90790650-90810150  | 19501     | 3   | 1    | 1          | 1     | 1     | 1  | 1      | 0     | 3               | 3     | 1      | 2      | 1      | 1      |          |
| chr2:59760925-5978075    | 17151     | 3   | 1    | 1          | 2     | 1     | 1  | 2      | 0     | 1               | 3     | 1      | 2      | 2      | 1      |          |
| chr6:37852300-37874075   | 21776     | 3   | 1    | 0          | 1     | 0     | 1  | 2      | 0     | 1               | 3     | 0      | 1      | 1      | 1      |          |
| chr14:70218275-70241100  | 22826     | 3   | 1    | 0          | 3     | 1     | 1  | 1      | 0     | 1               | 1     | 1      | 3      | 1      | 1      |          |
| chr1:83290500-83321125   | 30626     | 3   | 1    | 1          | 1     | 0     | 0  | 3      | 1     | 1               | 1     | 1      | 2      | 2      | 1      |          |
| chrX:45204175-45226275   | 22101     | 3   | 1    | 1          | 1     | 1     | 1  | 2      | 1     | 2               | 3     | 1      | 1      | 1      | 2      |          |
| chrX:106809250-106830375 | 21126     | 3   | 1    | 1          | 1     | 1     | 0  | 1      | 1     | 3               | 2     | 1      | 1      | 1      | 1      |          |
| chr14:20357225           |           |     |      |            |       |       |    |        |       |                 |       |        |        |        |        |          |

| location                  | span (nt) | max |      | hypothalam |       |       |    |        |       |      |       |   |   |   | skeletal muscle | spleen | testes | Comments |
|---------------------------|-----------|-----|------|------------|-------|-------|----|--------|-------|------|-------|---|---|---|-----------------|--------|--------|----------|
|                           |           | max | mean | adipose    | colon | heart | us | kidney | liver | lung | ovary |   |   |   |                 |        |        |          |
| chr2:23500725-235027750   | 20526     | 3   | 1    | 1          | 2     | 1     | 1  | 1      | 0     | 2    | 1     | 0 | 3 | 2 | 0               | 3      | 2      |          |
| chr2:235436300-235461250  | 24951     | 3   | 1    | 0          | 2     | 0     | 1  | 2      | 1     | 1    | 2     | 0 | 3 | 2 | 0               | 3      | 2      |          |
| chr5:72582075-72621975    | 39901     | 3   | 1    | 0          | 1     | 1     | 1  | 3      | 2     | 1    | 1     | 1 | 0 | 1 | 0               | 1      | 1      |          |
| chr7:17050950-17064125    | 13176     | 3   | 2    | 1          | 2     | 1     | 1  | 1      | 0     | 1    | 3     | 3 | 2 | 1 | 2               | 2      | 2      |          |
| chr21:43431675-43445875   | 14201     | 3   | 1    | 1          | 2     | 1     | 1  | 1      | 3     | 0    | 1     | 2 | 1 | 2 | 2               | 2      | 2      |          |
| chr3:138221350-138270375  | 49026     | 3   | 2    | 1          | 2     | 1     | 0  | 1      | 1     | 3    | 2     | 2 | 1 | 1 | 3               | 1      | 3      |          |
| chr4:108912750-108928175  | 15426     | 3   | 1    | 0          | 1     | 1     | 0  | 2      | 1     | 1    | 2     | 2 | 1 | 3 | 1               | 3      | 1      |          |
| chr8:51844825-51856000    | 11176     | 3   | 1    | 0          | 0     | 0     | 0  | 2      | 0     | 0    | 0     | 3 | 0 | 2 | 1               | 0      | 1      |          |
| chr1:55603825-55618950    | 15126     | 3   | 1    | 0          | 0     | 0     | 0  | 3      | 0     | 0    | 0     | 0 | 0 | 0 | 1               | 0      | 1      |          |
| chr7:44985790-44993250    | 7501      | 3   | 1    | 0          | 1     | 0     | 1  | 0      | 0     | 2    | 2     | 2 | 0 | 3 | 1               | 1      | 1      |          |
| chr1:170043625-170063325  | 19701     | 3   | 1    | 0          | 1     | 0     | 0  | 1      | 0     | 0    | 1     | 3 | 1 | 1 | 2               | 1      | 2      |          |
| chrX:112520800-112559300  | 38501     | 3   | 1    | 1          | 1     | 1     | 1  | 2      | 1     | 2    | 3     | 1 | 1 | 2 | 1               | 2      | 2      |          |
| chr6:113779025-113797250  | 18226     | 3   | 1    | 0          | 0     | 0     | 0  | 1      | 0     | 3    | 0     | 0 | 0 | 0 | 0               | 1      | 1      |          |
| chrX:7521975-7559900      | 33926     | 3   | 2    | 1          | 2     | 1     | 1  | 2      | 1     | 3    | 2     | 2 | 1 | 2 | 2               | 2      | 2      |          |
| chr10:82403500-82422325   | 18826     | 3   | 1    | 0          | 3     | 0     | 0  | 1      | 0     | 1    | 1     | 2 | 1 | 0 | 1               | 1      | 1      |          |
| chr12:84376050-84390000   | 13951     | 3   | 1    | 1          | 3     | 1     | 1  | 1      | 1     | 1    | 2     | 1 | 2 | 1 | 2               | 2      | 2      |          |
| chr8:23401500-23433375    | 31876     | 3   | 1    | 1          | 1     | 0     | 1  | 1      | 0     | 1    | 2     | 1 | 3 | 1 | 3               | 1      | 1      |          |
| chr4:60197375-60231625    | 34251     | 3   | 2    | 1          | 2     | 1     | 1  | 2      | 1     | 2    | 3     | 1 | 3 | 1 | 3               | 2      | 2      |          |
| chr7:13200925-132019600   | 18676     | 3   | 1    | 1          | 2     | 1     | 1  | 1      | 0     | 1    | 3     | 1 | 2 | 1 | 2               | 1      | 1      |          |
| chr1:54700800-54715125    | 14326     | 3   | 1    | 1          | 2     | 1     | 0  | 1      | 1     | 3    | 1     | 0 | 1 | 0 | 1               | 1      | 1      |          |
| chr17:35920625-35944325   | 23701     | 3   | 1    | 1          | 2     | 1     | 1  | 1      | 0     | 3    | 1     | 1 | 3 | 1 | 3               | 1      | 1      |          |
| chr14:82180425-82193800   | 13376     | 3   | 1    | 1          | 3     | 0     | 0  | 1      | 0     | 1    | 2     | 0 | 2 | 2 | 2               | 2      | 2      |          |
| chr15:68264425-68364650   | 100226    | 3   | 2    | 2          | 3     | 1     | 1  | 2      | 1     | 2    | 2     | 1 | 2 | 1 | 2               | 2      | 2      |          |
| chr6:24848150-24866900    | 18751     | 3   | 1    | 1          | 3     | 1     | 1  | 1      | 0     | 1    | 2     | 0 | 2 | 1 | 2               | 1      | 1      |          |
| chr20:38277400-38346375   | 68976     | 3   | 2    | 1          | 2     | 1     | 1  | 2      | 1     | 2    | 3     | 1 | 2 | 2 | 2               | 2      | 2      |          |
| chr7:3112050-3122375      | 10326     | 3   | 1    | 0          | 0     | 0     | 0  | 0      | 0     | 0    | 3     | 0 | 2 | 1 | 2               | 1      | 1      |          |
| chr13:54046725-54067800   | 21076     | 3   | 1    | 1          | 1     | 1     | 1  | 1      | 1     | 1    | 3     | 0 | 0 | 0 | 1               | 1      | 1      |          |
| chr11:123446150-123461375 | 15226     | 3   | 1    | 0          | 1     | 0     | 0  | 1      | 0     | 0    | 0     | 0 | 0 | 0 | 0               | 3      | 3      |          |
| chr1:110967750-110987075  | 19326     | 3   | 1    | 1          | 3     | 1     | 0  | 1      | 0     | 2    | 1     | 0 | 1 | 0 | 1               | 1      | 1      |          |
| chr2:145044975-145101650  | 56676     | 3   | 1    | 1          | 2     | 1     | 0  | 1      | 0     | 2    | 3     | 1 | 2 | 1 | 2               | 1      | 1      |          |
| chrX:113383525-113403350  | 19826     | 3   | 1    | 1          | 3     | 1     | 1  | 1      | 0     | 1    | 2     | 1 | 1 | 1 | 1               | 1      | 1      |          |
| chr12:112666800-112695075 | 28276     | 3   | 1    | 0          | 1     | 0     | 2  | 0      | 0     | 1    | 1     | 1 | 0 | 1 | 0               | 3      | 3      |          |
| chr6:107039875-107055450  | 15576     | 3   | 1    | 2          | 1     | 1     | 0  | 3      | 0     | 1    | 1     | 0 | 1 | 0 | 1               | 1      | 1      |          |
| chrX:39545025-39558350    | 13326     | 3   | 1    | 1          | 1     | 0     | 1  | 3      | 0     | 1    | 1     | 0 | 1 | 0 | 1               | 1      | 1      |          |
| chr2:209877875-209888250  | 20376     | 3   | 1    | 1          | 1     | 1     | 1  | 1      | 0     | 2    | 2     | 1 | 3 | 1 | 3               | 1      | 1      |          |
| chr8:98281700-98293000    | 11301     | 3   | 1    | 0          | 2     | 1     | 2  | 2      | 0     | 2    | 3     | 1 | 1 | 2 | 1               | 2      | 1      |          |
| chr13:20795375-20806850   | 11476     | 3   | 1    | 1          | 1     | 1     | 1  | 2      | 0     | 1    | 1     | 1 | 1 | 3 | 2               | 1      | 2      |          |
| chr16:64354175-64369575   | 15401     | 3   | 1    | 0          | 1     | 0     | 0  | 1      | 0     | 3    | 1     | 0 | 1 | 0 | 1               | 3      | 1      |          |
| chr4:97862925-97919950    | 57026     | 3   | 1    | 1          | 2     | 1     | 1  | 2      | 0     | 3    | 1     | 1 | 2 | 0 | 2               | 0      | 2      |          |
| chr6:45930950-45960325    | 29376     | 3   | 0    | 0          | 1     | 1     | 0  | 0      | 0     | 3    | 0     | 1 | 2 | 0 | 0               | 0      | 0      |          |
| chr2:113338800-113367300  | 28501     | 3   | 1    | 1          | 1     | 0     | 0  | 0      | 1     | 2    | 0     | 0 | 0 | 0 | 0               | 3      | 3      |          |
| chr5:100029775-100049250  | 20151     | 2   | 1    | 1          | 2     | 1     | 1  | 1      | 0     | 2    | 2     | 1 | 2 | 1 | 2               | 2      | 2      |          |
| chr6:40364375-40431825    | 67451     | 2   | 1    | 0          | 2     | 1     | 1  | 1      | 2     | 1    | 1     | 1 | 1 | 2 | 1               | 2      | 1      |          |
| chr12:66382725-66396775   | 14051     | 2   | 1    | 0          | 1     | 0     | 1  | 0      | 0     | 1    | 1     | 1 | 2 | 2 | 2               | 1      | 1      |          |
| chr8:8448600-8464875      | 16276     | 2   | 1    | 1          | 2     | 1     | 0  | 1      | 1     | 1    | 1     | 1 | 0 | 2 | 2               | 2      | 2      |          |
| chr10:5323425-5346050     | 22626     | 2   | 1    | 1          | 1     | 1     | 1  | 2      | 2     | 2    | 1     | 1 | 2 | 1 | 2               | 1      | 1      |          |
| chr11:61497150-61510050   | 12901     | 2   | 1    | 0          | 1     | 0     | 0  | 2      | 1     | 1    | 1     | 1 | 0 | 1 | 1               | 1      | 1      |          |
| chr16:82518800-82529525   | 10726     | 2   | 1    | 1          | 2     | 1     | 0  | 2      | 0     | 0    | 2     | 1 | 1 | 1 | 1               | 1      | 1      |          |
| chr7:52638425-52662275    | 23851     | 2   | 1    | 1          | 2     | 1     | 1  | 2      | 0     | 1    | 2     | 1 | 2 | 1 | 2               | 2      | 2      |          |
| chr18:19102650-19116400   | 13751     | 2   | 1    | 1          | 2     | 1     | 1  | 1      | 0     | 1    | 2     | 0 | 2 | 0 | 2               | 2      | 2      |          |
| chr2:15837300-15865800    | 28501     | 2   | 1    | 1          | 2     | 1     | 1  | 1      | 1     | 2    | 2     | 0 | 1 | 1 | 2               | 1      | 1      |          |
| chr2:208068275-208086800  | 18526     | 2   | 1    | 1          | 1     | 0     | 0  | 1      | 0     | 1    | 1     | 0 | 2 | 1 | 0               | 2      | 1      |          |
| chr5:130418650-130430500  | 11851     | 2   | 1    | 0          | 2     | 0     | 0  | 1      | 0     | 1    | 2     | 0 | 2 | 1 | 0               | 2      | 1      |          |
| chr6:23772575-23786650    | 14076     | 2   | 1    | 1          | 1     | 1     | 0  | 1      | 0     | 2    | 2     | 1 | 1 | 1 | 1               | 1      | 1      |          |
| chr2:129171850-129204875  | 33026     | 2   | 1    | 1          | 2     | 0     | 1  | 1      | 0     | 1    | 2     | 1 | 2 | 1 | 2               | 1      | 1      |          |
| chr2:207882050-207916600  | 34551     | 2   | 1    | 2          | 2     | 0     | 0  | 1      | 0     | 2    | 1     | 0 | 1 | 2 | 1               | 2      | 1      |          |
| chr10:31640150-31647375   | 7226      | 2   | 1    | 1          | 0     | 0     | 1  | 1      | 0     | 1    | 2     | 1 | 1 | 1 | 1               | 1      | 1      |          |
| chr13:32944875-32958750   | 13876     | 2   | 1    | 1          | 1     | 0     | 0  | 1      | 0     | 1    | 2     | 0 | 1 | 1 | 1               | 1      | 1      |          |
| chr10:8185475-8199525     | 14051     | 2   | 1    | 1          | 1     | 1     | 1  | 2      | 0     | 2    | 1     | 0 | 2 | 1 | 0               | 2      | 1      |          |
| chr1:37631125-37664925    | 33801     | 2   | 1    | 1          | 2     | 1     | 1  | 1      | 0     | 2    | 1     | 2 | 1 | 2 | 1               | 2      | 1      |          |
| chr13:37652175-37671200   | 19026     | 2   | 1    | 1          | 1     | 1     | 0  | 2      | 0     | 1    | 1     | 1 | 1 | 1 | 1               | 1      | 1      |          |
| chr13:30514900-30551075   | 36176     | 2   | 1    | 0          | 1     | 0     | 2  | 0      | 0     | 1    | 1     | 0 | 1 | 1 | 0               | 1      | 1      |          |
| chr3:52030875-52042150    | 11276     | 2   | 0    | 0          | 0     | 0     | 0  | 1      | 0     | 0    | 2     | 0 | 2 | 0 | 0               | 0      | 0      |          |
| chr4:13433500-13445875    | 12376     | 2   | 1    | 0          | 1     | 2     | 0  | 1      | 0     | 0    | 1     | 0 | 1 | 2 | 1               | 2      | 1      |          |
| chr12:74122750-74141150   | 18401     | 2   | 1    | 0          | 1     | 1     | 0  | 1      | 0     | 1    | 2     | 2 | 1 | 0 | 1               | 2      | 1      |          |
| chr3:191350675-191373100  | 22426     | 2   | 1    | 1          | 1     | 0     | 1  | 2      | 0     | 1    | 2     | 0 | 2 | 0 | 2               | 2      | 2      |          |
| chr4:13280500-13304225    | 23726     | 2   | 1    | 0          | 0     | 0     | 0  | 2      | 0     | 0    | 2     | 2 | 0 | 0 | 0               | 2      | 2      |          |
| chr9:99670975-99681450    | 10476     | 2   | 1    | 1          | 1     | 0     | 1  | 1      | 1     | 2    | 1     | 1 | 2 | 1 | 2               | 1      | 1      |          |
| chr12:99650125-99682025   | 31901     | 2   | 1    | 0          | 1     | 0     | 0  | 0      | 0     | 0    | 1     | 0 | 0 | 0 | 0               | 2      | 2      |          |
| chr11:118872950-118890300 | 17351     | 2   | 1    | 1          | 2     | 1     | 1  | 2      | 0     | 1    | 2     | 1 | 1 | 1 | 1               | 1      | 1      |          |
| chr12:63186050-63201475   | 15426     | 2   | 1    | 1          | 2     | 1     | 0  | 2      | 1     | 2    | 2     | 1 | 2 | 1 | 2               | 2      | 2      |          |
| chr14:37627700-37638050   | 10351     | 2   | 1    | 0          | 1     | 1     | 1  | 1      | 0     | 1    | 2     | 1 | 2 | 1 | 2               | 2      | 2      |          |
| chr3:174419600-174466075  | 26476     | 2   | 1    | 1          | 2     | 1     | 0  | 2      | 0     | 2    | 2     | 1 | 2 | 1 | 2               | 1      | 1      |          |
| chr3:15547200-15558900    | 11701     | 2   | 1    | 1          | 1     | 0     | 1  | 2      | 1     | 1    | 2     | 1 | 2 | 1 | 2               | 2      | 2      |          |
| chr9:101349675-101362675  | 13001     | 2   | 1    | 0          | 0     | 1     | 0  | 2      | 0     | 1    | 2     | 1 | 1 | 2 | 1               | 2      | 1      |          |
| chr9:197532200-197543775  | 11576     | 2   | 1    | 0          | 0     | 1     | 0  | 0      | 0     | 1    | 0     | 0 | 2 | 1 | 0               | 2      | 1      |          |
| chr13:2030375-20313325    | 10951     | 2   | 1    | 0          | 1     | 2     | 1  | 0      | 0     | 1    | 1     | 0 | 1 | 1 | 0               | 1      | 1      |          |
| chr12:46230950-46303950   | 10901     | 2   | 1    | 0          | 0     | 0     | 0  | 2      | 0     | 0    | 2     | 1 | 1 | 1 | 1               | 1      | 1      |          |
| chr1:226983650-227005375  | 21726     | 2   | 1    | 1          | 2     | 1     | 1  | 1      | 0     | 2    | 1     | 1 | 1 | 1 | 1               | 1      | 1      |          |
| chr4:24088325-24111350    | 23026     | 2   | 1    | 0          | 2     | 0     | 0  | 1      | 0     | 1    | 2     | 1 | 1 | 1 | 1               | 1      | 1      |          |
| chr5:126425050-126439050  | 14001     | 2   | 1    | 1          | 1     | 0     | 0  | 1      | 0     | 0    | 1     | 0 | 2 | 1 | 2               | 2      | 2      |          |
| chr12:28059800-28074275   | 14476     | 2   | 1    | 1          | 0     | 0     | 0  | 1      | 0     | 2    | 0     | 0 | 0 | 0 | 0               | 1      | 1      |          |
| chr6:114419675-114434275  | 14601     | 2   | 1    | 2          | 1     | 1     | 2  | 1      | 1     | 2    | 2     | 1 | 2 | 1 | 2               | 1      | 1      |          |
| chr10:46439775-46457625   | 17851     | 2   | 1    | 0          | 2     | 0     | 0  | 0      | 0     | 1    | 1     | 0 | 0 | 0 | 1               | 0      | 1      |          |
| chr10:72470575-72517275   | 46701     | 2   | 1    | 1          | 2     | 1     | 1  | 1      | 0     | 1    | 1     | 0 | 1 | 1 | 1               | 1      | 1      |          |
| chr17:21173800-21193125   | 19326     | 2   | 1    | 0          | 2     | 1     | 0  | 1      | 0     | 1    | 1     | 0 | 1 | 0 | 1               | 1      | 1      |          |
| chr5:151402350-151417950  | 15601     | 2   | 1    | 2          | 1     | 1     | 1  | 2      | 1     | 2    | 1     | 1 | 1 | 1 | 1               | 2      | 1      |          |
| chr5:67021350-67033475    | 12126     | 2   | 1    | 0          | 1     | 0     | 0  | 1      | 1     | 2    | 0     | 2 | 0 | 2 | 0               | 1      | 1      |          |
| chr2:46610375-46622325    | 11951     | 2   | 1    | 2          | 1     | 2     | 1  | 2      | 0     | 2    | 2     | 1 | 2 | 1 | 2               | 1      | 1      |          |
| chr2:68699850-68713300    | 13451     | 2   | 1    | 1          | 1     | 1     | 1  | 1      | 0     | 1    | 2     |   |   |   |                 |        |        |          |

| location                  | span (nt) |     |      | hypothalam |       |       |    |        |       | skeletal |       |        | Comments |        |
|---------------------------|-----------|-----|------|------------|-------|-------|----|--------|-------|----------|-------|--------|----------|--------|
|                           |           | max | mean | adipose    | colon | heart | us | kidney | liver | lung     | ovary | muscle |          | spleen |
| chr5:65651750-65665975    | 14226     | 2   | 1    | 0          | 1     | 2     | 0  | 1      | 0     | 0        | 1     | 1      | 0        | 2      |
| chr7:134059975-134078575  | 18601     | 2   | 1    | 1          | 2     | 1     | 1  | 1      | 0     | 1        | 2     | 2      | 1        | 2      |
| chr10:14583425-14595550   | 12126     | 2   | 1    | 0          | 0     | 0     | 0  | 2      | 1     | 1        | 0     | 0      | 2        | 1      |
| chr14:59839275-59854025   | 14751     | 2   | 1    | 0          | 1     | 1     | 0  | 1      | 1     | 1        | 1     | 1      | 2        | 1      |
| chr1:227938125-227966450  | 28326     | 2   | 1    | 1          | 2     | 1     | 1  | 1      | 1     | 0        | 1     | 2      | 0        | 1      |
| chr1:192052425-192067650  | 15226     | 2   | 1    | 0          | 1     | 1     | 0  | 1      | 2     | 1        | 2     | 1      | 1        | 1      |
| chr14:103819375-103843275 | 23901     | 2   | 0    | 0          | 1     | 0     | 1  | 1      | 0     | 0        | 2     | 0      | 0        | 0      |
| chr16:86886600-86897900   | 11301     | 2   | 0    | 0          | 0     | 0     | 0  | 0      | 0     | 0        | 2     | 0      | 0        | 0      |
| chr7:129874900-129897250  | 22826     | 2   | 1    | 1          | 2     | 1     | 0  | 1      | 0     | 1        | 1     | 2      | 1        | 1      |
| chr7:36085575-36119900    | 33726     | 2   | 1    | 0          | 1     | 0     | 0  | 1      | 0     | 1        | 1     | 2      | 1        | 0      |
| chr1:229493875-229512225  | 18351     | 2   | 1    | 1          | 2     | 0     | 2  | 2      | 0     | 1        | 2     | 1      | 1        | 1      |
| chr7:45292550-45303650    | 11101     | 2   | 1    | 1          | 2     | 0     | 1  | 1      | 0     | 2        | 1     | 2      | 1        | 1      |
| chr7:156071100-156081325  | 10226     | 2   | 1    | 1          | 2     | 0     | 1  | 2      | 1     | 0        | 1     | 0      | 1        | 1      |
| chrX:16485950-16503000    | 17051     | 2   | 1    | 0          | 2     | 1     | 0  | 1      | 0     | 1        | 2     | 1      | 1        | 1      |
| chr12:1905425-1919900     | 14476     | 2   | 1    | 0          | 1     | 1     | 1  | 1      | 0     | 1        | 2     | 1      | 2        | 2      |
| chr2:173862575-173875725  | 13151     | 2   | 1    | 1          | 1     | 1     | 1  | 1      | 2     | 1        | 1     | 1      | 1        | 1      |
| chr5:7315850-7326875      | 11026     | 2   | 1    | 0          | 1     | 1     | 0  | 2      | 0     | 2        | 1     | 1      | 1        | 2      |
| chr14:102278900-102297625 | 18726     | 2   | 1    | 0          | 2     | 1     | 0  | 1      | 1     | 1        | 1     | 0      | 1        | 1      |
| chr2:102247075-102260750  | 13676     | 2   | 1    | 0          | 1     | 0     | 0  | 0      | 0     | 2        | 0     | 0      | 2        | 0      |
| chr9:110220050-110234450  | 14401     | 2   | 1    | 0          | 1     | 1     | 0  | 1      | 0     | 1        | 2     | 1      | 1        | 1      |
| chr2:112100575-112126675  | 26101     | 2   | 1    | 1          | 2     | 1     | 0  | 2      | 0     | 2        | 1     | 2      | 1        | 1      |
| chr1:108668675-108685775  | 17101     | 2   | 1    | 0          | 0     | 0     | 0  | 0      | 0     | 0        | 1     | 0      | 1        | 2      |
| chr14:96861925-96885100   | 23176     | 2   | 1    | 0          | 1     | 0     | 0  | 1      | 0     | 1        | 2     | 0      | 0        | 1      |
| chr2:68414075-68436975    | 22901     | 2   | 1    | 0          | 2     | 1     | 1  | 1      | 0     | 1        | 2     | 1      | 2        | 1      |
| chr8:59599400-59611475    | 12076     | 2   | 1    | 1          | 1     | 1     | 1  | 1      | 0     | 1        | 2     | 1      | 1        | 1      |
| chr1:111258200-111271650  | 13451     | 2   | 1    | 0          | 1     | 0     | 0  | 1      | 1     | 2        | 1     | 0      | 2        | 1      |
| chr3:28780450-28795425    | 14976     | 2   | 1    | 1          | 2     | 0     | 0  | 1      | 0     | 1        | 1     | 0      | 1        | 1      |
| chr8:107124300-107141200  | 16901     | 2   | 1    | 1          | 2     | 0     | 0  | 1      | 0     | 0        | 2     | 0      | 0        | 1      |
| chr7:154880875-154899050  | 18176     | 2   | 0    | 0          | 0     | 0     | 2  | 0      | 0     | 0        | 0     | 0      | 0        | 0      |
| chr4:119116800-119129925  | 13126     | 2   | 1    | 0          | 1     | 0     | 0  | 1      | 0     | 1        | 1     | 0      | 2        | 1      |
| chr4:109537600-109559575  | 21976     | 2   | 1    | 1          | 2     | 1     | 1  | 2      | 0     | 1        | 1     | 0      | 1        | 1      |
| chr7:63974350-63986200    | 11851     | 2   | 1    | 0          | 2     | 0     | 1  | 0      | 0     | 1        | 0     | 0      | 0        | 2      |
| chr9:110453000-110477975  | 24976     | 2   | 1    | 1          | 1     | 1     | 1  | 2      | 0     | 1        | 1     | 0      | 1        | 2      |
| chr2:177413225-177449975  | 36751     | 2   | 1    | 1          | 1     | 0     | 1  | 1      | 0     | 0        | 2     | 0      | 0        | 1      |
| chr6:3720750-3734450      | 13701     | 2   | 0    | 0          | 0     | 0     | 0  | 0      | 2     | 0        | 0     | 0      | 0        | 0      |
| chr3:127457650-127470750  | 13101     | 2   | 0    | 2          | 0     | 0     | 0  | 1      | 0     | 1        | 0     | 0      | 0        | 0      |
| chr16:1370125-1384875     | 14751     | 2   | 1    | 1          | 2     | 0     | 1  | 1      | 0     | 2        | 2     | 0      | 2        | 1      |
| chr7:154956450-154968800  | 12351     | 2   | 1    | 1          | 2     | 0     | 1  | 1      | 1     | 1        | 1     | 0      | 1        | 1      |
| chr8:86661875-86704300    | 42426     | 2   | 1    | 1          | 2     | 1     | 1  | 1      | 0     | 1        | 2     | 0      | 1        | 1      |
| chr15:35840950-35861750   | 20801     | 2   | 1    | 1          | 1     | 1     | 0  | 2      | 1     | 1        | 2     | 1      | 1        | 1      |
| chr12:27470200-27503925   | 33726     | 2   | 1    | 0          | 1     | 2     | 1  | 2      | 1     | 1        | 2     | 1      | 1        | 2      |
| chr16:8529025-85242650    | 33626     | 2   | 1    | 1          | 1     | 2     | 1  | 2      | 0     | 1        | 1     | 1      | 1        | 1      |
| chr1:230946300-230968050  | 21751     | 2   | 1    | 1          | 1     | 0     | 0  | 1      | 0     | 1        | 1     | 1      | 1        | 2      |
| chr5:153310925-153336875  | 25951     | 2   | 1    | 1          | 1     | 0     | 1  | 1      | 0     | 1        | 1     | 1      | 2        | 2      |
| chr16:64844625-64859475   | 14851     | 2   | 1    | 0          | 0     | 0     | 0  | 1      | 0     | 1        | 2     | 0      | 0        | 1      |
| chr2:75102425-75113500    | 11076     | 2   | 1    | 0          | 0     | 0     | 0  | 1      | 0     | 0        | 2     | 0      | 1        | 1      |
| chr3:140070825-140082475  | 11651     | 2   | 1    | 0          | 2     | 1     | 0  | 1      | 0     | 1        | 2     | 1      | 1        | 1      |
| chr3:72052025-72073225    | 21201     | 2   | 1    | 0          | 2     | 0     | 0  | 1      | 0     | 1        | 1     | 1      | 0        | 1      |
| chr21:26566775-26598525   | 31751     | 2   | 1    | 0          | 1     | 1     | 1  | 1      | 1     | 2        | 1     | 1      | 1        | 1      |
| chr4:6803950-6814375      | 10426     | 2   | 1    | 0          | 1     | 0     | 0  | 1      | 1     | 2        | 1     | 0      | 0        | 1      |
| chrX:46061075-46074800    | 13726     | 2   | 1    | 2          | 1     | 1     | 0  | 2      | 0     | 0        | 1     | 0      | 1        | 1      |
| chr1:198069025-198095775  | 26751     | 2   | 1    | 0          | 1     | 0     | 0  | 1      | 0     | 1        | 1     | 1      | 1        | 2      |
| chr6:28257900-28284400    | 26501     | 2   | 1    | 0          | 1     | 1     | 0  | 1      | 0     | 1        | 2     | 0      | 1        | 1      |
| chr8:133765050-133775675  | 10626     | 2   | 1    | 1          | 1     | 1     | 0  | 0      | 0     | 1        | 1     | 0      | 2        | 0      |
| chrX:68155600-68165750    | 10151     | 2   | 0    | 0          | 2     | 0     | 0  | 0      | 1     | 0        | 1     | 0      | 0        | 1      |
| chr16:85714350-85726850   | 12501     | 2   | 1    | 0          | 1     | 0     | 1  | 1      | 0     | 0        | 1     | 0      | 0        | 2      |
| chr14:58685825-58705500   | 19676     | 2   | 1    | 0          | 2     | 0     | 0  | 1      | 0     | 1        | 1     | 0      | 1        | 1      |
| chr12:37070650-37099175   | 28526     | 2   | 1    | 1          | 1     | 0     | 1  | 1      | 0     | 1        | 2     | 1      | 1        | 1      |
| chr14:50957850-50968625   | 10776     | 2   | 0    | 0          | 0     | 0     | 0  | 0      | 0     | 0        | 2     | 0      | 0        | 0      |
| chr2:208088275-208101600  | 13326     | 2   | 1    | 1          | 1     | 1     | 0  | 0      | 0     | 1        | 2     | 0      | 2        | 1      |
| chr16:24382475-24394475   | 12001     | 2   | 1    | 0          | 1     | 1     | 1  | 1      | 0     | 2        | 1     | 0      | 1        | 2      |
| chr12:91114125-91124300   | 10176     | 2   | 1    | 1          | 0     | 0     | 0  | 1      | 0     | 2        | 1     | 0      | 1        | 1      |
| chr3:14365525-14403925    | 38401     | 2   | 1    | 1          | 1     | 1     | 0  | 1      | 0     | 2        | 1     | 2      | 1        | 1      |
| chr3:18718325-18755600    | 37276     | 2   | 1    | 1          | 2     | 1     | 0  | 1      | 0     | 2        | 2     | 1      | 2        | 1      |
| chrX:9188975-9205300      | 16326     | 2   | 1    | 0          | 1     | 0     | 1  | 0      | 0     | 2        | 0     | 0      | 0        | 1      |
| chr17:31380950-31404075   | 23126     | 2   | 1    | 0          | 2     | 1     | 1  | 2      | 1     | 1        | 2     | 0      | 1        | 2      |
| chrX:8034225-8044325      | 10101     | 2   | 1    | 0          | 1     | 0     | 0  | 1      | 0     | 0        | 2     | 1      | 1        | 1      |
| chr1:89972700-89985275    | 12576     | 2   | 1    | 1          | 1     | 0     | 0  | 1      | 0     | 1        | 1     | 0      | 2        | 1      |
| chr14:75090375-75100625   | 10251     | 2   | 1    | 1          | 1     | 1     | 1  | 1      | 0     | 1        | 0     | 0      | 2        | 1      |
| chr7:17693175-17708075    | 14901     | 2   | 1    | 0          | 1     | 0     | 0  | 0      | 0     | 0        | 0     | 1      | 2        | 0      |
| chr1:186622825-186667625  | 44801     | 2   | 1    | 1          | 2     | 0     | 1  | 1      | 0     | 1        | 1     | 0      | 1        | 1      |
| chr14:54626650-54641500   | 14851     | 2   | 1    | 0          | 2     | 0     | 0  | 0      | 0     | 0        | 1     | 0      | 1        | 1      |
| chr2:195714425-195743825  | 29401     | 2   | 1    | 0          | 1     | 1     | 0  | 1      | 0     | 1        | 1     | 2      | 1        | 2      |
| chr10:120025775-120037250 | 11476     | 2   | 0    | 1          | 2     | 1     | 0  | 2      | 0     | 1        | 1     | 1      | 1        | 1      |
| chrX:108755875-108765750  | 9876      | 2   | 0    | 0          | 0     | 0     | 0  | 0      | 0     | 0        | 1     | 0      | 1        | 2      |
| chr5:170925150-170938100  | 12951     | 2   | 1    | 0          | 2     | 0     | 1  | 0      | 0     | 0        | 0     | 0      | 1        | 1      |
| chr8:123180400-1232425250 | 64851     | 2   | 1    | 1          | 2     | 2     | 1  | 1      | 0     | 1        | 2     | 0      | 1        | 1      |
| chr9:453935775-453952650  | 16876     | 2   | 1    | 0          | 1     | 0     | 0  | 2      | 0     | 1        | 1     | 0      | 1        | 1      |
| chr9:108063575-108084000  | 20426     | 2   | 1    | 0          | 1     | 0     | 0  | 1      | 0     | 0        | 1     | 2      | 1        | 1      |
| chr10:21588375-21603075   | 14701     | 2   | 1    | 0          | 1     | 0     | 0  | 1      | 0     | 1        | 2     | 0      | 0        | 1      |
| chr8:116879400-116915750  | 36351     | 2   | 1    | 1          | 1     | 1     | 1  | 2      | 0     | 1        | 2     | 1      | 1        | 2      |
| chr13:90287700-90298800   | 11101     | 2   | 1    | 0          | 1     | 1     | 1  | 2      | 0     | 1        | 1     | 1      | 1        | 1      |
| chr5:172802300-172835075  | 32776     | 2   | 1    | 1          | 1     | 1     | 1  | 1      | 0     | 1        | 1     | 1      | 0        | 2      |
| chr6:319725-331650        | 11926     | 2   | 1    | 0          | 0     | 0     | 0  | 0      | 1     | 1        | 1     | 1      | 2        | 1      |
| chr1:190336425-190386300  | 49876     | 2   | 1    | 0          | 2     | 1     | 1  | 1      | 0     | 1        | 2     | 0      | 1        | 1      |
| chr1:32953825-32968200    | 14376     | 2   | 1    | 1          | 2     | 0     | 2  | 2      | 1     | 1        | 1     | 0      | 1        | 1      |
| chr10:46461825-46483150   | 21326     | 2   | 1    | 0          | 2     | 0     | 1  | 1      | 0     | 1        | 1     | 0      | 1        | 1      |
| chr18:69428125-69440375   | 12251     | 2   | 1    | 1          | 2     | 1     | 0  | 0      | 0     | 1        | 0     | 1      | 0        | 0      |
| chr8:135270400-135285950  | 15551     | 2   | 1    | 1          | 2     | 1     | 1  | 1      | 0     | 1        | 2     | 0      | 1        | 1      |
| chr11:12061300-12075325   | 14026     | 2   | 1    | 0          | 1     | 0     | 0  | 0      | 0     | 1        | 0     | 0      | 1        | 2      |
| chr7:148684475-148711675  | 27201     | 2   | 1    | 1          | 1     | 1     | 1  | 1      | 0     | 1        | 2     | 1      | 1        | 2      |
| chr7:37491050-37501225    | 10176     | 2   | 1    | 1          | 1     | 0     | 0  | 1      | 0     | 1        | 1     | 0      | 1        | 2      |
| chr20:21494900-21542475   | 47576     | 2   | 1    | 1          | 2     | 0     | 1  | 2      | 1     | 1        | 1     | 1      | 1        | 1      |
| chr4:12494675-12506850    | 12176     | 2   | 1    | 1          | 1     | 1     | 0  | 2      | 0     | 0        | 1     | 0      | 1        | 1      |
| chr1:209780925-209794325  | 13401     | 2   | 1    | 1          | 1     | 1     | 2  | 1      | 1     | 1        | 2     | 1      | 1        | 1      |
| chr11:44514100-44530500   | 16401     | 2   | 1    | 0          | 1     | 1     | 1  | 1      | 0     | 1        | 2     | 0      | 1        | 1      |
| chr7:19668825-19689525    | 20701     | 2   | 1    | 0          | 0     | 1     | 0  | 1      | 0     | 0        | 2     | 1      | 1        | 1      |
| chr21:23019950-23043675   | 23726     | 2   | 0    | 0          | 1     | 0     | 0  | 0      | 0     | 1        | 0     | 0      | 0        | 2      |
| chr1:116599350-116640475  | 41126     | 2   | 1    | 0          | 2     | 0     | 1  | 1      | 0     | 1        | 1     | 0      | 0        | 1      |
| chr12:12899550-12917075   | 17526     | 2   | 1    | 1          | 2     | 1     | 1  | 1      | 0     | 1        | 1     | 1      | 2        | 2      |
| chr4:84501725-84520225    | 18501     | 2   | 1    | 0          | 2     | 1     | 1  | 1      | 0     | 1        | 1     | 2      | 1        | 1      |
| chr2:19843425-19853775    | 10351     | 2   | 1    | 1          | 1     | 1     | 0  | 2      | 1     | 0        | 1     | 1      | 1        | 1      |
| chr6:8877300-88787350     | 10051     | 2   | 0    | 0          | 0     | 0     | 0  | 2      | 0     | 0        | 0     | 0      | 0        | 0      |
| chr7:45237050-45257100    | 20051     | 2   |      |            |       |       |    |        |       |          |       |        |          |        |



| location                  | span (nt) | mean |      | hypothalam |       |       |    |        |       |      |       | skeletal muscle |        |   | Comments |
|---------------------------|-----------|------|------|------------|-------|-------|----|--------|-------|------|-------|-----------------|--------|---|----------|
|                           |           | max  | mean | adipose    | colon | heart | us | kidney | liver | lung | ovary | spleen          | testes |   |          |
| chr11:11610275-11623250   | 12976     | 2    | 1    | 1          | 2     | 1     | 1  | 1      | 0     | 2    | 1     | 1               | 1      | 1 |          |
| chr2:20228225-20252075    | 23851     | 2    | 1    | 1          | 2     | 0     | 0  | 1      | 0     | 2    | 1     | 0               | 1      | 1 |          |
| chr13:94099200-94126650   | 27451     | 2    | 1    | 1          | 2     | 1     | 1  | 1      | 0     | 1    | 1     | 1               | 1      | 1 |          |
| chr12:60293850-60330425   | 36576     | 2    | 1    | 0          | 1     | 1     | 1  | 1      | 0     | 1    | 2     | 0               | 1      | 1 |          |
| chr15:86016750-86031775   | 15026     | 2    | 0    | 0          | 0     | 0     | 0  | 0      | 0     | 0    | 0     | 0               | 0      | 2 |          |
| chr12:130862425-130873450 | 11026     | 2    | 1    | 1          | 2     | 1     | 0  | 1      | 0     | 1    | 1     | 1               | 1      | 1 |          |
| chr8:49497300-49508350    | 11051     | 2    | 0    | 0          | 2     | 0     | 0  | 0      | 0     | 0    | 0     | 0               | 0      | 0 |          |
| chrX:13179325-13195650    | 16326     | 2    | 0    | 0          | 0     | 0     | 0  | 0      | 0     | 2    | 0     | 0               | 0      | 0 |          |
| chr2:60308225-60325275    | 17051     | 2    | 1    | 0          | 1     | 1     | 1  | 1      | 0     | 1    | 2     | 0               | 1      | 2 |          |
| chr10:3295350-33306125    | 10776     | 2    | 1    | 1          | 1     | 0     | 0  | 0      | 0     | 1    | 2     | 1               | 1      | 1 |          |
| chr4:28047250-28057975    | 10726     | 2    | 0    | 0          | 0     | 0     | 0  | 0      | 0     | 0    | 2     | 0               | 0      | 0 |          |
| chr7:11807075-118082125   | 12051     | 2    | 0    | 1          | 1     | 1     | 1  | 2      | 1     | 1    | 2     | 1               | 2      | 2 |          |
| chr7:126966450-126978000  | 11551     | 2    | 1    | 0          | 1     | 0     | 0  | 1      | 1     | 1    | 1     | 0               | 1      | 2 |          |
| chr2:191182625-191194800  | 12176     | 2    | 1    | 1          | 1     | 1     | 1  | 1      | 1     | 1    | 1     | 1               | 2      | 2 |          |
| chr12:71402075-71451500   | 49426     | 2    | 1    | 1          | 2     | 1     | 1  | 1      | 1     | 0    | 2     | 2               | 2      | 2 |          |
| chr20:41540650-41550875   | 10226     | 2    | 1    | 0          | 1     | 1     | 0  | 1      | 0     | 1    | 2     | 1               | 1      | 0 |          |
| chr7:25945000-25956500    | 11501     | 2    | 1    | 0          | 1     | 0     | 0  | 1      | 1     | 1    | 2     | 0               | 1      | 0 |          |
| chr2:140320750-140345675  | 24926     | 2    | 1    | 1          | 2     | 0     | 0  | 1      | 0     | 1    | 2     | 0               | 1      | 0 |          |
| chr5:123989500-124000000  | 10501     | 2    | 1    | 0          | 2     | 1     | 0  | 1      | 0     | 2    | 1     | 1               | 1      | 0 |          |
| chr2:100743825-100764825  | 21001     | 2    | 0    | 0          | 1     | 0     | 0  | 2      | 0     | 0    | 1     | 0               | 0      | 0 |          |
| chr4:123259225-123275150  | 15926     | 2    | 1    | 1          | 0     | 0     | 1  | 0      | 0     | 1    | 1     | 0               | 2      | 0 |          |
| chrX:97117325-97138975    | 21651     | 2    | 1    | 1          | 0     | 1     | 1  | 1      | 0     | 1    | 1     | 1               | 2      | 0 |          |
| chr13:62527475-62547500   | 20026     | 2    | 0    | 0          | 1     | 0     | 0  | 0      | 0     | 0    | 0     | 0               | 0      | 2 |          |
| chr2:3018400-3029600      | 11201     | 2    | 1    | 0          | 2     | 0     | 1  | 0      | 0     | 0    | 0     | 0               | 1      | 1 |          |
| chr5:67639050-67653625    | 14576     | 2    | 1    | 0          | 2     | 0     | 1  | 1      | 1     | 1    | 0     | 0               | 1      | 1 |          |
| chr8:126534450-126548675  | 14226     | 2    | 1    | 0          | 2     | 1     | 0  | 1      | 0     | 1    | 1     | 0               | 1      | 1 |          |
| chr9:136478450-136494350  | 15901     | 2    | 1    | 0          | 2     | 0     | 0  | 0      | 0     | 0    | 2     | 1               | 1      | 0 |          |
| chr3:140886175-140908425  | 22251     | 2    | 1    | 0          | 0     | 0     | 0  | 1      | 0     | 0    | 2     | 1               | 1      | 1 |          |
| chr5:71698825-71709925    | 11101     | 2    | 1    | 0          | 0     | 1     | 1  | 1      | 0     | 0    | 2     | 0               | 2      | 1 |          |
| chrX:17692075-17705000    | 12926     | 2    | 0    | 0          | 0     | 0     | 1  | 0      | 0     | 0    | 2     | 0               | 0      | 1 |          |
| chr18:52269550-52287850   | 18301     | 2    | 1    | 1          | 1     | 0     | 0  | 0      | 0     | 0    | 1     | 0               | 2      | 1 |          |
| chr2:239386225-239398275  | 12051     | 2    | 1    | 0          | 0     | 0     | 0  | 2      | 1     | 1    | 0     | 1               | 1      | 1 |          |
| chr11:75618975-75681950   | 62976     | 2    | 1    | 0          | 2     | 0     | 1  | 1      | 0     | 1    | 1     | 0               | 1      | 1 |          |
| chr12:12035425-12048075   | 12651     | 2    | 1    | 0          | 2     | 1     | 0  | 1      | 0     | 1    | 1     | 0               | 1      | 0 |          |
| chr13:76119825-76133875   | 14051     | 2    | 1    | 1          | 2     | 1     | 0  | 1      | 1     | 1    | 1     | 0               | 2      | 2 |          |
| chr4:75749750-75816175    | 66426     | 2    | 1    | 1          | 2     | 1     | 1  | 1      | 0     | 1    | 1     | 0               | 1      | 1 |          |
| chr6:105257475-105276750  | 19276     | 2    | 1    | 0          | 1     | 0     | 0  | 1      | 0     | 1    | 1     | 1               | 1      | 2 |          |
| chr4:82927700-82939425    | 11726     | 2    | 1    | 1          | 1     | 1     | 1  | 2      | 0     | 1    | 1     | 0               | 1      | 1 |          |
| chr13:73143700-73156425   | 12726     | 2    | 0    | 0          | 0     | 0     | 0  | 1      | 0     | 0    | 1     | 1               | 2      | 0 |          |
| chr4:45663225-45675625    | 12401     | 2    | 1    | 0          | 0     | 1     | 0  | 1      | 0     | 1    | 1     | 1               | 2      | 1 |          |
| chrX:42589900-42605225    | 15326     | 2    | 0    | 0          | 1     | 0     | 0  | 0      | 0     | 0    | 0     | 0               | 1      | 2 |          |
| chr11:117199575-117199550 | 19976     | 2    | 1    | 0          | 2     | 0     | 0  | 0      | 0     | 1    | 1     | 0               | 2      | 1 |          |
| chr10:124096325-124117225 | 20901     | 2    | 1    | 0          | 2     | 0     | 0  | 1      | 0     | 1    | 1     | 0               | 1      | 1 |          |
| chr16:13375750-73388725   | 20976     | 2    | 1    | 2          | 0     | 0     | 0  | 0      | 0     | 1    | 1     | 0               | 1      | 1 |          |
| chr8:49339350-49364275    | 24926     | 2    | 1    | 0          | 2     | 1     | 1  | 1      | 1     | 1    | 1     | 1               | 1      | 1 |          |
| chr10:116737575-116751575 | 14001     | 2    | 1    | 0          | 1     | 0     | 0  | 1      | 0     | 0    | 1     | 0               | 1      | 2 |          |
| chr6:167563325-167591625  | 28301     | 2    | 1    | 0          | 0     | 0     | 1  | 1      | 0     | 1    | 1     | 1               | 0      | 1 |          |
| chr13:26929500-26940825   | 11326     | 2    | 0    | 0          | 1     | 0     | 0  | 0      | 1     | 2    | 0     | 0               | 0      | 0 |          |
| chr8:101497275-101508975  | 11701     | 2    | 1    | 0          | 1     | 0     | 0  | 1      | 0     | 2    | 0     | 0               | 0      | 1 |          |
| chr8:55859150-55874925    | 15776     | 2    | 1    | 0          | 0     | 0     | 0  | 2      | 0     | 2    | 1     | 0               | 1      | 1 |          |
| chr12:66122475-66133100   | 10626     | 2    | 1    | 0          | 0     | 0     | 0  | 0      | 0     | 1    | 1     | 2               | 0      | 0 |          |
| chr2:102818025-102837000  | 18976     | 2    | 1    | 0          | 1     | 2     | 0  | 1      | 0     | 1    | 1     | 2               | 1      | 1 |          |
| chr2:60939000-60949925    | 10926     | 2    | 0    | 0          | 0     | 0     | 0  | 1      | 0     | 0    | 2     | 0               | 0      | 0 |          |
| chr21:40002450-40025400   | 22951     | 2    | 1    | 1          | 1     | 1     | 1  | 1      | 0     | 1    | 2     | 0               | 1      | 1 |          |
| chr6:168840750-168858250  | 17501     | 2    | 0    | 0          | 0     | 0     | 0  | 0      | 0     | 0    | 2     | 0               | 0      | 0 |          |
| chrX:33839175-33855650    | 16476     | 2    | 1    | 0          | 0     | 1     | 0  | 0      | 0     | 0    | 2     | 1               | 0      | 1 |          |
| chr4:122340200-122357975  | 17776     | 2    | 1    | 0          | 1     | 0     | 0  | 1      | 0     | 1    | 1     | 0               | 2      | 1 |          |
| chr8:13423000-134240175   | 17176     | 2    | 1    | 0          | 1     | 0     | 0  | 1      | 0     | 1    | 0     | 0               | 2      | 0 |          |
| chr1:233083800-233131200  | 47401     | 2    | 1    | 0          | 2     | 1     | 1  | 1      | 1     | 1    | 1     | 1               | 1      | 1 |          |
| chr10:79868075-79885175   | 17101     | 2    | 1    | 0          | 2     | 0     | 1  | 0      | 0     | 1    | 1     | 0               | 1      | 1 |          |
| chr12:22424300-22444300   | 20001     | 2    | 1    | 0          | 2     | 0     | 1  | 1      | 0     | 1    | 1     | 1               | 1      | 1 |          |
| chr10:74794275-74801925   | 7651      | 2    | 1    | 0          | 1     | 1     | 1  | 1      | 0     | 1    | 2     | 1               | 1      | 1 |          |
| chr3:129629700-129653875  | 24176     | 2    | 1    | 1          | 1     | 1     | 1  | 1      | 0     | 1    | 2     | 1               | 1      | 1 |          |
| chr6:16828500-168281475   | 52976     | 2    | 1    | 0          | 1     | 0     | 0  | 1      | 0     | 2    | 0     | 0               | 1      | 1 |          |
| chr3:40633100-40647875    | 14776     | 2    | 1    | 0          | 1     | 0     | 0  | 1      | 0     | 0    | 1     | 0               | 2      | 1 |          |
| chr6:56831150-56842350    | 11201     | 2    | 1    | 1          | 2     | 0     | 1  | 0      | 0     | 0    | 1     | 0               | 1      | 0 |          |
| chr1:233176125-233186700  | 10576     | 2    | 1    | 0          | 1     | 1     | 0  | 0      | 2     | 1    | 1     | 0               | 1      | 0 |          |
| chr2:83365875-83377675    | 11801     | 2    | 1    | 0          | 1     | 1     | 0  | 0      | 0     | 1    | 2     | 0               | 1      | 1 |          |
| chr3:39253550-39266600    | 13051     | 2    | 1    | 0          | 1     | 0     | 0  | 0      | 0     | 1    | 2     | 0               | 1      | 1 |          |
| chr4:103259950-103278600  | 18651     | 2    | 1    | 0          | 1     | 1     | 0  | 1      | 0     | 1    | 2     | 1               | 1      | 1 |          |
| chr15:95199150-95215225   | 16076     | 2    | 0    | 0          | 1     | 0     | 0  | 0      | 1     | 2    | 0     | 0               | 0      | 1 |          |
| chr2:33927975-3395425     | 27451     | 2    | 1    | 0          | 1     | 1     | 0  | 1      | 0     | 1    | 1     | 1               | 1      | 2 |          |
| chr3:165381975-165394700  | 12726     | 2    | 0    | 0          | 1     | 1     | 0  | 2      | 0     | 1    | 0     | 0               | 0      | 0 |          |
| chr12:12974250-129761400  | 18851     | 2    | 1    | 1          | 1     | 1     | 1  | 1      | 0     | 1    | 2     | 0               | 1      | 1 |          |
| chr11:93342525-93370800   | 28276     | 2    | 1    | 0          | 2     | 0     | 0  | 1      | 0     | 1    | 1     | 1               | 1      | 1 |          |
| chr13:111038175-111051075 | 12901     | 2    | 1    | 0          | 2     | 0     | 0  | 0      | 0     | 1    | 1     | 0               | 1      | 1 |          |
| chr18:10217025-10229050   | 12026     | 2    | 1    | 0          | 2     | 1     | 0  | 0      | 0     | 1    | 0     | 0               | 1      | 1 |          |
| chr7:64405850-64428525    | 22676     | 2    | 0    | 1          | 2     | 0     | 0  | 1      | 0     | 1    | 1     | 1               | 1      | 1 |          |
| chr11:113400350-113410875 | 10526     | 2    | 0    | 0          | 0     | 0     | 0  | 0      | 0     | 0    | 0     | 2               | 0      | 0 |          |
| chr13:77485575-77499475   | 13901     | 2    | 0    | 0          | 0     | 0     | 1  | 2      | 0     | 0    | 0     | 0               | 0      | 1 |          |
| chr8:87388450-87400450    | 12001     | 1    | 1    | 0          | 1     | 0     | 0  | 1      | 0     | 0    | 1     | 0               | 1      | 1 |          |
| chr15:72297100-72307675   | 10576     | 1    | 1    | 0          | 1     | 0     | 0  | 0      | 0     | 1    | 1     | 0               | 1      | 1 |          |
| chr18:31270875-31282100   | 11226     | 1    | 1    | 0          | 1     | 0     | 0  | 1      | 0     | 1    | 1     | 0               | 1      | 1 |          |
| chr7:1314975-1333125      | 18151     | 1    | 1    | 0          | 1     | 0     | 0  | 0      | 0     | 1    | 1     | 0               | 1      | 1 |          |
| chr12:62078650-62106025   | 27376     | 1    | 1    | 1          | 1     | 1     | 1  | 1      | 0     | 1    | 1     | 0               | 1      | 1 |          |
| chr7:38128125-38146550    | 18426     | 1    | 1    | 0          | 1     | 0     | 0  | 1      | 0     | 1    | 1     | 0               | 1      | 0 |          |
| chr18:45525275-45537075   | 11801     | 1    | 1    | 0          | 0     | 0     | 0  | 1      | 0     | 0    | 1     | 0               | 1      | 1 |          |
| chr5:123734825-123757500  | 22676     | 1    | 1    | 1          | 1     | 1     | 1  | 1      | 0     | 1    | 1     | 1               | 1      | 1 |          |
| chr2:131299475-131308500  | 31376     | 1    | 1    | 0          | 1     | 0     | 1  | 0      | 0     | 0    | 0     | 0               | 1      | 1 |          |
| chr15:34482575-34514925   | 32351     | 1    | 1    | 0          | 1     | 0     | 0  | 1      | 0     | 0    | 1     | 0               | 1      | 1 |          |
| chr4:100514375-100523250  | 17976     | 1    | 1    | 1          | 0     | 1     | 0  | 1      | 1     | 1    | 1     | 0               | 1      | 0 |          |
| chr3:59513350-59536300    | 22951     | 1    | 1    | 0          | 1     | 0     | 0  | 1      | 0     | 1    | 1     | 0               | 0      | 1 |          |
| chr5:172551525-172566225  | 14701     | 1    | 1    | 0          | 1     | 0     | 1  | 1      | 0     | 1    | 1     | 0               | 1      | 1 |          |
| chr6:106317650-106342450  | 24801     | 1    | 0    | 0          | 1     | 0     | 0  | 0      | 0     | 1    | 1     | 0               | 1      | 1 |          |
| chr8:143050700-143089375  | 38676     | 1    | 1    | 0          | 1     | 0     | 1  | 1      | 0     | 1    | 0     | 0               | 1      | 0 |          |
| chr7:1010875-10127025     | 18451     | 1    | 1    | 0          | 1     | 1     | 1  | 1      | 0     | 1    | 1     | 0               | 1      | 1 |          |
| chr1:94192050-94206150    | 14101     | 1    | 1    | 0          | 0     | 0     | 0  | 1      | 0     | 1    | 1     | 0               | 1      | 1 |          |
| chr10:72048325-72060125   | 11801     | 1    | 1    | 0          | 1     | 0     | 1  | 1      | 0     | 1    | 1     | 0               | 1      | 0 |          |
| chr13:65073950-65093750   | 19801     | 1    | 1    | 1          | 1     | 1     | 0  | 1      | 0     | 1    | 1     | 1               | 1      | 1 |          |
| chrX:42410125-42420750    | 10626     | 1    | 0    | 0          | 0     | 0     | 0  | 1      | 0     | 0    | 0     | 0               | 0      | 0 |          |
| chr10:9125775-9138650     | 12876     | 1    | 0    | 1          | 0     | 0     | 1  | 1      | 0     | 0    | 0     | 0               | 0      | 1 |          |
| chr6:137747450-137784475  | 37026     | 1    | 1    | 1          | 1     | 0     | 1  | 1      | 1     | 1    | 1     | 0               | 1      | 1 |          |
| chr8:58422575-58434950    | 12        |      |      |            |       |       |    |        |       |      |       |                 |        |   |          |

| Location                   | span (nt) | mean |      | hypothalam |       |       |    |        |       |      |       | skeletal muscle |   |   | spleen | testes | Comments |
|----------------------------|-----------|------|------|------------|-------|-------|----|--------|-------|------|-------|-----------------|---|---|--------|--------|----------|
|                            |           | max  | mean | adipose    | colon | heart | us | kidney | liver | lung | ovary |                 |   |   |        |        |          |
| chr9:110587325-110599600   | 12276     | 1    | 1    | 1          | 1     | 0     | 0  | 0      | 0     | 0    | 1     | 0               | 1 | 1 | 1      |        |          |
| chr4:126684025-126702050   | 18026     | 1    | 1    | 0          | 1     | 0     | 0  | 1      | 0     | 1    | 1     | 0               | 1 | 0 | 1      |        |          |
| chr1:227336900-227362675   | 25776     | 1    | 1    | 1          | 1     | 0     | 1  | 1      | 0     | 1    | 1     | 0               | 1 | 0 | 1      |        |          |
| chr9:20275050-20313050     | 38001     | 1    | 1    | 0          | 0     | 0     | 0  | 0      | 0     | 1    | 1     | 0               | 1 | 0 | 1      |        |          |
| chr10:43662450-43681050    | 18601     | 1    | 1    | 1          | 0     | 1     | 0  | 0      | 0     | 0    | 0     | 0               | 0 | 1 | 1      |        |          |
| chr10:95690050-95706050    | 16001     | 1    | 1    | 0          | 1     | 0     | 0  | 0      | 0     | 0    | 1     | 0               | 1 | 0 | 1      |        |          |
| chr8:107241625-107259900   | 14276     | 1    | 1    | 1          | 1     | 0     | 0  | 1      | 0     | 1    | 1     | 0               | 1 | 0 | 1      |        |          |
| chr5:172935725-172946925   | 11201     | 1    | 1    | 0          | 0     | 1     | 0  | 0      | 1     | 0    | 0     | 1               | 1 | 1 | 1      |        |          |
| chr5:61790650-61807975     | 17326     | 1    | 0    | 0          | 0     | 0     | 0  | 0      | 0     | 0    | 0     | 1               | 0 | 0 | 1      |        |          |
| chr18:12755775-12765850    | 10076     | 1    | 0    | 0          | 1     | 0     | 0  | 0      | 0     | 1    | 1     | 0               | 1 | 0 | 1      |        |          |
| chr3:34601800-34619400     | 17601     | 1    | 1    | 0          | 0     | 1     | 1  | 0      | 0     | 1    | 1     | 0               | 1 | 0 | 1      |        |          |
| chr12:123289800-123300925  | 11126     | 1    | 0    | 0          | 0     | 1     | 0  | 0      | 1     | 0    | 1     | 0               | 1 | 0 | 1      |        |          |
| chr1:210766975-210778775   | 11801     | 1    | 1    | 0          | 1     | 0     | 0  | 1      | 0     | 1    | 1     | 1               | 0 | 1 | 1      |        |          |
| chr4:3267300-3280150       | 12851     | 1    | 1    | 0          | 1     | 0     | 0  | 0      | 0     | 0    | 1     | 1               | 0 | 0 | 1      |        |          |
| chr13:25892925-25912325    | 19401     | 1    | 1    | 0          | 0     | 1     | 0  | 0      | 1     | 0    | 1     | 1               | 1 | 1 | 1      |        |          |
| chr16:11202325-11213275    | 10951     | 1    | 1    | 0          | 1     | 0     | 0  | 1      | 0     | 1    | 1     | 1               | 1 | 1 | 1      |        |          |
| chr16:85636250-85652025    | 15776     | 1    | 0    | 0          | 1     | 0     | 0  | 1      | 0     | 0    | 0     | 0               | 0 | 0 | 1      |        |          |
| chr18:65815775-65821875    | 6101      | 1    | 1    | 0          | 0     | 0     | 0  | 1      | 0     | 0    | 0     | 1               | 1 | 1 | 1      |        |          |
| chr7:131200300-131215700   | 15401     | 1    | 1    | 0          | 1     | 1     | 0  | 1      | 0     | 1    | 1     | 0               | 1 | 1 | 1      |        |          |
| chr18:62495250-62511675    | 16426     | 1    | 1    | 0          | 0     | 1     | 0  | 1      | 0     | 1    | 1     | 0               | 1 | 0 | 1      |        |          |
| chr11:3318675-3329000      | 10326     | 1    | 0    | 0          | 0     | 0     | 0  | 1      | 0     | 0    | 0     | 0               | 1 | 0 | 1      |        |          |
| chr18:5049900-50530325     | 30426     | 1    | 1    | 1          | 1     | 1     | 0  | 1      | 0     | 1    | 1     | 0               | 1 | 0 | 1      |        |          |
| chr21:36918225-36929075    | 10851     | 1    | 0    | 0          | 0     | 0     | 0  | 1      | 0     | 0    | 0     | 0               | 0 | 0 | 0      |        |          |
| chr1:184977425-184989700   | 12276     | 1    | 0    | 0          | 0     | 0     | 0  | 1      | 0     | 0    | 0     | 1               | 0 | 1 | 1      |        |          |
| chr10:20704225-20728925    | 24701     | 1    | 1    | 1          | 1     | 1     | 0  | 1      | 0     | 1    | 1     | 0               | 1 | 0 | 1      |        |          |
| chr8:102116975-102146725   | 29751     | 1    | 1    | 0          | 1     | 0     | 0  | 0      | 0     | 1    | 1     | 0               | 1 | 0 | 1      |        |          |
| chr8:62947050-62968950     | 21901     | 1    | 0    | 0          | 1     | 0     | 0  | 1      | 0     | 0    | 0     | 0               | 0 | 0 | 0      |        |          |
| chr6:160265000-160304725   | 39726     | 1    | 1    | 0          | 1     | 0     | 1  | 1      | 0     | 1    | 1     | 1               | 1 | 1 | 1      |        |          |
| chr7:106011900-106044800   | 32901     | 1    | 1    | 1          | 1     | 0     | 0  | 1      | 0     | 0    | 0     | 1               | 1 | 1 | 1      |        |          |
| chr3:1054400-1066350       | 11951     | 1    | 1    | 1          | 1     | 1     | 0  | 1      | 0     | 0    | 0     | 1               | 1 | 0 | 1      |        |          |
| chr13:96567750-96587100    | 19351     | 1    | 0    | 0          | 0     | 0     | 1  | 0      | 0     | 0    | 0     | 1               | 1 | 0 | 1      |        |          |
| chr15:75776925-75798350    | 21426     | 1    | 1    | 0          | 1     | 0     | 1  | 1      | 0     | 1    | 1     | 0               | 0 | 0 | 1      |        |          |
| chr5:138004150-138033350   | 29201     | 1    | 1    | 0          | 1     | 0     | 0  | 0      | 0     | 1    | 1     | 0               | 1 | 0 | 1      |        |          |
| chr6:169980975-170009950   | 28976     | 1    | 0    | 0          | 1     | 0     | 0  | 1      | 0     | 0    | 1     | 0               | 0 | 0 | 0      |        |          |
| chr2:65553800-65571600     | 17801     | 1    | 1    | 0          | 1     | 0     | 0  | 1      | 0     | 1    | 1     | 0               | 1 | 1 | 1      |        |          |
| chr3:14234200-14253875     | 19676     | 1    | 1    | 0          | 1     | 1     | 0  | 1      | 0     | 1    | 1     | 1               | 1 | 1 | 1      |        |          |
| chr3:151675700-151689700   | 14001     | 1    | 1    | 0          | 1     | 1     | 0  | 1      | 0     | 1    | 1     | 1               | 1 | 1 | 1      |        |          |
| chr13:36774375-36786575    | 12201     | 1    | 0    | 0          | 1     | 0     | 0  | 0      | 0     | 0    | 0     | 0               | 0 | 1 | 1      |        |          |
| chr4:60023500-60045050     | 21551     | 1    | 1    | 0          | 1     | 1     | 1  | 1      | 0     | 1    | 1     | 0               | 1 | 1 | 1      |        |          |
| chr5:82720450-82740300     | 19851     | 1    | 1    | 0          | 1     | 0     | 0  | 1      | 0     | 1    | 1     | 1               | 1 | 1 | 1      |        |          |
| chr11:70708525-707633050   | 54776     | 1    | 1    | 1          | 1     | 1     | 1  | 1      | 0     | 1    | 1     | 0               | 1 | 1 | 1      |        |          |
| chr8:129364550-129362050   | 60501     | 1    | 1    | 1          | 1     | 0     | 1  | 1      | 0     | 1    | 1     | 0               | 1 | 1 | 1      |        |          |
| chr2:174618925-17463575    | 14651     | 1    | 0    | 0          | 1     | 0     | 0  | 0      | 0     | 0    | 1     | 0               | 0 | 0 | 1      |        |          |
| chr3:162956025-162984275   | 28251     | 1    | 0    | 1          | 1     | 0     | 1  | 0      | 1     | 0    | 1     | 0               | 1 | 0 | 1      |        |          |
| chr4:80131600-801413150    | 11551     | 1    | 0    | 1          | 1     | 1     | 1  | 0      | 0     | 1    | 1     | 0               | 1 | 0 | 1      |        |          |
| chr5:82352125-82366025     | 13901     | 1    | 1    | 0          | 0     | 1     | 1  | 1      | 0     | 0    | 1     | 0               | 1 | 0 | 1      |        |          |
| chr1:232846750-232871450   | 24701     | 1    | 1    | 0          | 1     | 0     | 0  | 1      | 0     | 1    | 1     | 1               | 1 | 1 | 1      |        |          |
| chr18:3275925-3287175      | 11251     | 1    | 1    | 0          | 1     | 1     | 0  | 0      | 1     | 1    | 1     | 0               | 1 | 1 | 1      |        |          |
| chr18:73132350-73145125    | 12776     | 1    | 1    | 1          | 0     | 0     | 0  | 1      | 0     | 0    | 1     | 0               | 0 | 0 | 1      |        |          |
| chr5:171039675-171075250   | 35576     | 1    | 0    | 0          | 1     | 0     | 0  | 1      | 0     | 0    | 1     | 0               | 0 | 0 | 1      |        |          |
| chr7:133743150-133761500   | 18351     | 1    | 1    | 1          | 0     | 0     | 1  | 0      | 0     | 0    | 0     | 0               | 0 | 0 | 0      |        |          |
| chr1:157866600-157887050   | 20451     | 1    | 1    | 0          | 1     | 0     | 0  | 0      | 1     | 0    | 1     | 1               | 0 | 0 | 1      |        |          |
| chr14:100893675-100910100  | 16426     | 1    | 0    | 0          | 0     | 0     | 0  | 0      | 0     | 0    | 1     | 0               | 0 | 0 | 1      |        |          |
| chr8:67374100-67384800     | 10701     | 1    | 0    | 0          | 0     | 0     | 0  | 1      | 0     | 1    | 1     | 0               | 0 | 0 | 1      |        |          |
| chr11:76004575-76019350    | 14776     | 1    | 1    | 0          | 1     | 0     | 0  | 0      | 1     | 0    | 1     | 1               | 1 | 1 | 1      |        |          |
| chr5:150980275-150993600   | 13326     | 1    | 1    | 1          | 1     | 1     | 1  | 1      | 0     | 1    | 1     | 1               | 1 | 1 | 1      |        |          |
| chr1:242144675-242161200   | 16526     | 1    | 0    | 0          | 0     | 0     | 1  | 0      | 0     | 0    | 1     | 0               | 1 | 0 | 1      |        |          |
| chr13:109450900-109474050  | 23151     | 1    | 0    | 0          | 0     | 0     | 1  | 0      | 0     | 0    | 0     | 0               | 0 | 0 | 1      |        |          |
| chr14:88668550-88683450    | 14901     | 1    | 0    | 0          | 0     | 0     | 0  | 0      | 0     | 1    | 1     | 1               | 1 | 1 | 1      |        |          |
| chr1:242224475-242238875   | 14401     | 1    | 0    | 0          | 1     | 0     | 1  | 0      | 0     | 0    | 1     | 0               | 0 | 0 | 1      |        |          |
| chr1:196602575-196613925   | 11351     | 1    | 0    | 0          | 0     | 0     | 0  | 1      | 0     | 0    | 0     | 0               | 0 | 0 | 1      |        |          |
| chr5:65527325-65546300     | 18976     | 1    | 1    | 1          | 1     | 0     | 0  | 1      | 0     | 1    | 0     | 1               | 0 | 1 | 1      |        |          |
| chr11:60195475-60207650    | 12176     | 1    | 0    | 0          | 1     | 0     | 0  | 0      | 0     | 0    | 0     | 0               | 1 | 1 | 1      |        |          |
| chr17:13668000-13679475    | 11476     | 1    | 1    | 0          | 1     | 0     | 0  | 1      | 0     | 0    | 1     | 0               | 1 | 0 | 1      |        |          |
| chr1:232737950-232749825   | 11876     | 1    | 0    | 0          | 1     | 0     | 0  | 0      | 0     | 0    | 0     | 0               | 0 | 0 | 0      |        |          |
| chr16:80725025-80730300    | 5276      | 1    | 0    | 0          | 1     | 0     | 1  | 0      | 0     | 0    | 0     | 0               | 0 | 0 | 0      |        |          |
| chr4:11720650-11746750     | 26101     | 1    | 1    | 0          | 1     | 1     | 0  | 1      | 0     | 1    | 0     | 1               | 0 | 1 | 1      |        |          |
| chr5:172072175-172091825   | 19651     | 1    | 0    | 0          | 1     | 0     | 0  | 1      | 1     | 1    | 1     | 0               | 0 | 1 | 0      |        |          |
| chr11:64016000-64031350    | 15351     | 1    | 1    | 1          | 0     | 1     | 0  | 1      | 0     | 0    | 1     | 0               | 1 | 0 | 1      |        |          |
| chr5:93854775-93865400     | 10626     | 1    | 0    | 0          | 0     | 0     | 0  | 1      | 0     | 0    | 1     | 0               | 1 | 0 | 1      |        |          |
| chr8:99411775-99424650     | 12876     | 1    | 1    | 0          | 1     | 1     | 0  | 1      | 0     | 1    | 1     | 0               | 1 | 0 | 1      |        |          |
| chr11:86907850-86918625    | 10776     | 1    | 0    | 0          | 0     | 0     | 0  | 0      | 0     | 1    | 0     | 0               | 0 | 1 | 1      |        |          |
| chr7:142857900-142879425   | 21526     | 1    | 1    | 0          | 1     | 0     | 0  | 0      | 0     | 1    | 1     | 0               | 1 | 0 | 1      |        |          |
| chr18:66573100-66583300    | 10201     | 1    | 0    | 0          | 1     | 0     | 0  | 1      | 0     | 0    | 0     | 0               | 0 | 0 | 1      |        |          |
| chr11:118079725-118089900  | 10176     | 1    | 1    | 0          | 1     | 0     | 0  | 1      | 1     | 1    | 1     | 0               | 1 | 0 | 1      |        |          |
| chr2:12721550-127268625    | 47076     | 1    | 1    | 1          | 0     | 0     | 0  | 1      | 0     | 1    | 0     | 0               | 0 | 0 | 0      |        |          |
| chr6:12422400-12439200     | 16801     | 1    | 1    | 0          | 0     | 0     | 0  | 0      | 1     | 1    | 1     | 0               | 1 | 1 | 1      |        |          |
| chr6:29955875-29973225     | 21451     | 1    | 1    | 0          | 0     | 0     | 1  | 0      | 0     | 1    | 1     | 0               | 0 | 1 | 1      |        |          |
| chr15:7331500-73346525     | 15026     | 1    | 0    | 0          | 0     | 0     | 0  | 1      | 0     | 0    | 1     | 0               | 1 | 0 | 1      |        |          |
| chr3:107753000-107766100   | 13101     | 1    | 0    | 0          | 0     | 0     | 1  | 1      | 0     | 0    | 1     | 0               | 0 | 0 | 0      |        |          |
| chr3:19009900-190110100    | 10201     | 1    | 1    | 0          | 1     | 1     | 0  | 1      | 0     | 1    | 1     | 1               | 1 | 1 | 1      |        |          |
| chr3:53080350-53090725     | 10376     | 1    | 1    | 1          | 0     | 0     | 1  | 1      | 0     | 1    | 1     | 1               | 1 | 1 | 1      |        |          |
| chr12:53675775-53689275    | 13501     | 1    | 1    | 0          | 1     | 1     | 0  | 0      | 0     | 0    | 1     | 0               | 1 | 1 | 1      |        |          |
| chr6:164379775-164403250   | 23476     | 1    | 1    | 0          | 1     | 0     | 1  | 1      | 0     | 1    | 1     | 0               | 1 | 0 | 1      |        |          |
| chr10:79685025-79696100    | 11076     | 1    | 0    | 0          | 0     | 0     | 1  | 0      | 0     | 0    | 0     | 0               | 0 | 0 | 0      |        |          |
| chr4:103556475-103569975   | 13501     | 1    | 1    | 0          | 1     | 0     | 1  | 1      | 0     | 1    | 1     | 0               | 1 | 0 | 1      |        |          |
| chr2:173956250-173969375   | 13126     | 1    | 0    | 0          | 1     | 1     | 0  | 0      | 0     | 0    | 1     | 1               | 0 | 1 | 1      |        |          |
| chr4:24699025-24711050     | 12026     | 1    | 1    | 1          | 0     | 0     | 0  | 1      | 0     | 1    | 1     | 1               | 1 | 1 | 1      |        |          |
| chr10:63773225-63790825    | 17601     | 1    | 1    | 0          | 1     | 0     | 1  | 1      | 0     | 1    | 1     | 0               | 1 | 0 | 1      |        |          |
| chr13:70805100-70838950    | 33851     | 1    | 1    | 1          | 0     | 0     | 0  | 1      | 0     | 1    | 1     | 0               | 1 | 0 | 1      |        |          |
| chr20:47658050-47669650    | 11601     | 1    | 1    | 0          | 1     | 0     | 0  | 1      | 0     | 1    | 0     | 0               | 0 | 1 | 1      |        |          |
| chr1:232962350-232985575   | 23226     | 1    | 1    | 0          | 1     | 0     | 1  | 1      | 0     | 1    | 0     | 0               | 0 | 0 | 0      |        |          |
| chr13:80149275-80161275    | 12001     | 1    | 0    | 0          | 1     | 0     | 0  | 0      | 0     | 0    | 0     | 0               | 1 | 1 | 1      |        |          |
| chr5:15074475-15098700     | 24226     | 1    | 0    | 0          | 1     | 0     | 0  | 1      | 0     | 1    | 1     | 0               | 1 | 0 | 1      |        |          |
| chr12:88147075-88171675    | 24601     | 1    | 1    | 0          | 0     | 1     | 0  | 1      | 0     | 1    | 1     | 1               | 1 | 1 | 1      |        |          |
| chr20:12132900-12146175    | 13276     | 1    | 0    | 0          | 0     | 0     | 0  | 1      | 0     | 1    | 1     | 0               | 0 | 0 | 1      |        |          |
| chr3:151267675-151279475   | 11801     | 1    | 0    | 0          | 0     | 0     | 1  | 0      | 0     | 0    | 1     | 1               | 0 | 0 | 0      |        |          |
| chr5:153865150-153884225</ |           |      |      |            |       |       |    |        |       |      |       |                 |   |   |        |        |          |

| location                  | span (nt) | max  |   | hypothalam |       |       |    |        |       |      |       |   |   | skeletal muscle | spleen | testes | Comments |
|---------------------------|-----------|------|---|------------|-------|-------|----|--------|-------|------|-------|---|---|-----------------|--------|--------|----------|
|                           |           | mean |   | adipose    | colon | heart | us | kidney | liver | lung | ovary |   |   |                 |        |        |          |
| chr10:119185750-119206425 | 20676     | 1    | 1 | 0          | 1     | 1     | 0  | 1      | 0     | 1    | 0     | 1 | 1 | 0               | 1      | 1      | 1        |
| chr1:206192400-206213400  | 21001     | 1    | 1 | 1          | 1     | 0     | 0  | 0      | 1     | 0    | 1     | 1 | 0 | 0               | 1      | 1      | 1        |
| chr3:129747975-129758550  | 10576     | 1    | 0 | 0          | 0     | 0     | 0  | 0      | 0     | 0    | 1     | 0 | 0 | 1               | 0      | 1      | 0        |
| chr5:20567625-20582975    | 15351     | 1    | 1 | 0          | 0     | 0     | 0  | 1      | 1     | 0    | 1     | 1 | 1 | 1               | 1      | 1      | 1        |
| chr5:58269850-58284050    | 14201     | 1    | 0 | 0          | 0     | 0     | 0  | 0      | 0     | 0    | 1     | 0 | 0 | 0               | 0      | 1      | 1        |
| chr7:107961175-107971925  | 10751     | 1    | 1 | 0          | 0     | 1     | 0  | 1      | 0     | 1    | 1     | 1 | 1 | 1               | 1      | 1      | 1        |
| chr10:79649925-79660825   | 10901     | 1    | 0 | 0          | 0     | 0     | 1  | 0      | 0     | 0    | 0     | 0 | 0 | 0               | 0      | 0      | 0        |
| chr12:131942275-131366850 | 24576     | 1    | 0 | 0          | 0     | 0     | 1  | 1      | 0     | 0    | 0     | 0 | 0 | 0               | 1      | 1      | 0        |
| chr2:141828150-141851300  | 23151     | 1    | 1 | 0          | 1     | 1     | 1  | 1      | 0     | 1    | 1     | 0 | 1 | 0               | 1      | 1      | 1        |
| chr9:115624525-115638900  | 14376     | 1    | 0 | 0          | 0     | 0     | 0  | 0      | 0     | 0    | 1     | 0 | 1 | 0               | 1      | 1      | 1        |
| chrX:130474825-130486100  | 11276     | 1    | 0 | 0          | 1     | 0     | 0  | 0      | 0     | 0    | 1     | 1 | 0 | 0               | 1      | 1      | 1        |
| chr15:54368275-54379425   | 11151     | 1    | 0 | 0          | 0     | 0     | 0  | 0      | 0     | 0    | 0     | 1 | 0 | 0               | 1      | 0      | 0        |
| chr20:23933300-23963300   | 30001     | 1    | 0 | 0          | 0     | 0     | 0  | 0      | 1     | 0    | 0     | 0 | 0 | 0               | 0      | 1      | 1        |
| chr20:23069750-23081475   | 11726     | 1    | 0 | 0          | 1     | 0     | 0  | 0      | 0     | 0    | 1     | 0 | 0 | 1               | 0      | 0      | 0        |
| chr14:100655175-100665700 | 10526     | 1    | 0 | 0          | 0     | 0     | 0  | 0      | 0     | 0    | 0     | 0 | 0 | 0               | 1      | 0      | 0        |
| chr11:125478700-125489900 | 11201     | 1    | 0 | 0          | 0     | 0     | 1  | 0      | 0     | 0    | 1     | 1 | 0 | 0               | 0      | 1      | 0        |
| chr8:143698500-143708725  | 10226     | 1    | 1 | 0          | 1     | 0     | 0  | 0      | 1     | 0    | 1     | 1 | 0 | 0               | 1      | 1      | 1        |
| chr1:211844700-211858375  | 13676     | 1    | 0 | 0          | 0     | 0     | 0  | 0      | 0     | 0    | 0     | 0 | 0 | 0               | 0      | 0      | 0        |
| chr7:132089250-132105750  | 16501     | 1    | 0 | 0          | 0     | 0     | 0  | 0      | 0     | 0    | 0     | 0 | 0 | 0               | 0      | 0      | 1        |
| chr1:142366925-142378900  | 11976     | 1    | 0 | 0          | 1     | 0     | 0  | 0      | 0     | 0    | 0     | 1 | 0 | 0               | 0      | 0      | 1        |
| chr10:125967200-125988150 | 20951     | 1    | 0 | 0          | 1     | 0     | 0  | 0      | 0     | 0    | 1     | 0 | 0 | 0               | 0      | 0      | 0        |
| chr12:125949425-125960625 | 11201     | 1    | 1 | 0          | 1     | 0     | 1  | 1      | 0     | 0    | 0     | 1 | 0 | 1               | 0      | 1      | 1        |
| chr5:158952700-158963825  | 11126     | 1    | 0 | 0          | 1     | 0     | 0  | 1      | 0     | 0    | 0     | 1 | 0 | 0               | 1      | 0      | 0        |
| chr10:5063025-5074225     | 11201     | 1    | 0 | 1          | 0     | 0     | 0  | 0      | 0     | 0    | 0     | 0 | 0 | 0               | 0      | 1      | 1        |
| chr2:130348325-130363275  | 14951     | 1    | 1 | 0          | 1     | 1     | 1  | 0      | 0     | 1    | 1     | 1 | 0 | 0               | 1      | 1      | 1        |
| chr7:85086825-85104450    | 17626     | 1    | 0 | 0          | 1     | 0     | 1  | 0      | 0     | 0    | 0     | 0 | 0 | 0               | 1      | 1      | 1        |
| chr12:83580475-83606200   | 25726     | 1    | 1 | 0          | 1     | 0     | 0  | 1      | 0     | 1    | 1     | 1 | 0 | 0               | 0      | 1      | 1        |
| chr13:21926150-21946050   | 19901     | 1    | 1 | 0          | 1     | 1     | 0  | 1      | 0     | 1    | 0     | 1 | 1 | 0               | 0      | 1      | 0        |
| chr4:55732800-55750175    | 17376     | 1    | 0 | 0          | 1     | 0     | 1  | 0      | 0     | 1    | 1     | 0 | 1 | 0               | 1      | 1      | 1        |
| chr6:137544875-137554925  | 10051     | 1    | 1 | 0          | 1     | 0     | 1  | 1      | 1     | 1    | 1     | 0 | 1 | 0               | 1      | 1      | 1        |
| chr1:84998125-85009475    | 11351     | 1    | 0 | 0          | 1     | 0     | 0  | 0      | 0     | 1    | 1     | 0 | 0 | 0               | 0      | 1      | 1        |
| chrX:13066500-13084525    | 18026     | 1    | 0 | 0          | 0     | 0     | 0  | 1      | 0     | 0    | 0     | 1 | 0 | 0               | 1      | 1      | 1        |
| chr6:137463000-137483475  | 20476     | 1    | 0 | 0          | 0     | 0     | 0  | 0      | 0     | 0    | 0     | 1 | 0 | 1               | 0      | 1      | 0        |
| chr6:40057500-40082950    | 25451     | 1    | 0 | 1          | 1     | 0     | 1  | 0      | 0     | 1    | 0     | 0 | 0 | 0               | 1      | 0      | 0        |
| chrX:107150775-107167475  | 16701     | 1    | 0 | 0          | 0     | 0     | 0  | 0      | 0     | 1    | 0     | 0 | 0 | 0               | 1      | 0      | 0        |
| chr18:18297450-18310625   | 13176     | 1    | 0 | 0          | 0     | 0     | 0  | 0      | 1     | 1    | 0     | 0 | 0 | 0               | 0      | 1      | 0        |
| chr8:115369100-115387225  | 18126     | 1    | 0 | 0          | 0     | 0     | 0  | 0      | 0     | 0    | 0     | 0 | 0 | 0               | 0      | 1      | 1        |
| chr1:18263675-18285975    | 22301     | 1    | 0 | 0          | 1     | 0     | 0  | 1      | 0     | 1    | 1     | 1 | 0 | 0               | 0      | 0      | 0        |
| chr1:56367475-56378825    | 11351     | 1    | 1 | 0          | 1     | 0     | 0  | 0      | 1     | 0    | 1     | 1 | 0 | 0               | 1      | 1      | 0        |
| chr13:110967175-110979375 | 12201     | 1    | 0 | 0          | 1     | 0     | 0  | 0      | 0     | 0    | 0     | 0 | 0 | 0               | 0      | 0      | 1        |
| chr2:112179825-112193875  | 14051     | 1    | 0 | 0          | 1     | 0     | 0  | 0      | 1     | 0    | 0     | 1 | 1 | 0               | 0      | 1      | 1        |
| chr7:86596600-86613925    | 17326     | 1    | 0 | 0          | 0     | 0     | 0  | 0      | 1     | 0    | 0     | 1 | 0 | 0               | 1      | 1      | 1        |
| chr8:124686250-124701500  | 15251     | 1    | 0 | 0          | 0     | 0     | 0  | 0      | 0     | 0    | 1     | 1 | 0 | 0               | 0      | 1      | 1        |
| chr2:206829500-206841100  | 15151     | 1    | 0 | 0          | 1     | 0     | 0  | 0      | 0     | 0    | 1     | 1 | 0 | 0               | 1      | 1      | 1        |
| chr2:148061475-148073025  | 11551     | 1    | 0 | 0          | 0     | 0     | 0  | 0      | 0     | 0    | 0     | 0 | 0 | 0               | 0      | 1      | 1        |
| chr5:68249800-68267150    | 17351     | 1    | 0 | 0          | 0     | 0     | 1  | 1      | 0     | 0    | 1     | 1 | 0 | 0               | 1      | 1      | 1        |
| chr1:212355225-212367225  | 12001     | 1    | 0 | 0          | 0     | 0     | 1  | 0      | 0     | 0    | 0     | 0 | 0 | 0               | 0      | 0      | 0        |
| chr2:100672675-100683975  | 11301     | 1    | 0 | 0          | 0     | 0     | 0  | 1      | 0     | 0    | 0     | 0 | 0 | 0               | 0      | 0      | 0        |
| chr2:177566750-177577650  | 10901     | 1    | 0 | 0          | 1     | 0     | 0  | 0      | 0     | 0    | 0     | 0 | 1 | 0               | 1      | 1      | 1        |
| chr8:135113725-135131100  | 17376     | 1    | 0 | 0          | 0     | 0     | 0  | 0      | 0     | 0    | 0     | 1 | 0 | 0               | 1      | 0      | 0        |
| chr1:245015075-245029300  | 14226     | 1    | 1 | 0          | 1     | 0     | 0  | 0      | 1     | 0    | 0     | 1 | 1 | 1               | 1      | 1      | 0        |
| chr10:102392025-102402450 | 10426     | 1    | 0 | 0          | 1     | 0     | 0  | 0      | 0     | 0    | 0     | 0 | 0 | 0               | 0      | 1      | 0        |
| chr11:39334375-39350600   | 16226     | 1    | 0 | 0          | 1     | 0     | 0  | 0      | 0     | 0    | 1     | 0 | 0 | 0               | 0      | 1      | 0        |
| chr15:97788575-97799125   | 10551     | 1    | 0 | 0          | 1     | 0     | 0  | 0      | 0     | 0    | 0     | 0 | 0 | 0               | 0      | 0      | 0        |
| chr18:74488625-74501875   | 13251     | 1    | 1 | 0          | 1     | 0     | 0  | 1      | 1     | 0    | 1     | 1 | 0 | 1               | 0      | 1      | 0        |
| chr13:44374400-44385800   | 11401     | 1    | 0 | 0          | 0     | 0     | 0  | 0      | 0     | 0    | 0     | 0 | 0 | 0               | 0      | 0      | 1        |
| chr2:72003825-72014850    | 11026     | 1    | 0 | 0          | 0     | 0     | 0  | 0      | 0     | 0    | 0     | 0 | 0 | 0               | 0      | 0      | 0        |
| chr21:44053175-44063175   | 10001     | 1    | 0 | 1          | 0     | 0     | 0  | 0      | 0     | 0    | 0     | 0 | 0 | 0               | 0      | 1      | 1        |
| chr12:113054050-113092400 | 38351     | 1    | 0 | 0          | 0     | 0     | 0  | 0      | 0     | 0    | 1     | 0 | 0 | 0               | 0      | 0      | 0        |
| chr1:4325150-4335375      | 10226     | 1    | 0 | 0          | 0     | 0     | 0  | 0      | 0     | 0    | 0     | 0 | 0 | 0               | 0      | 0      | 0        |
| chrX:45440850-45465775    | 24926     | 1    | 1 | 0          | 1     | 0     | 0  | 0      | 1     | 0    | 1     | 1 | 0 | 1               | 0      | 1      | 1        |
| chr1:144677300-144698225  | 20926     | 1    | 1 | 0          | 1     | 1     | 0  | 0      | 0     | 0    | 1     | 1 | 1 | 1               | 1      | 1      | 1        |
| chr16:26291625-26301925   | 10301     | 1    | 0 | 0          | 1     | 0     | 0  | 0      | 0     | 0    | 0     | 0 | 0 | 0               | 0      | 0      | 0        |
| chr15:77299925-77310325   | 10401     | 1    | 0 | 0          | 0     | 0     | 0  | 1      | 0     | 0    | 0     | 0 | 0 | 0               | 0      | 0      | 0        |
| chr5:122085725-122100025  | 14301     | 1    | 0 | 0          | 1     | 0     | 0  | 0      | 0     | 0    | 1     | 1 | 0 | 0               | 0      | 0      | 0        |
| chr8:143507200-143521850  | 14651     | 1    | 1 | 0          | 1     | 0     | 0  | 0      | 1     | 0    | 1     | 1 | 1 | 1               | 1      | 1      | 1        |
| chr8:8654675-8664850      | 10176     | 1    | 1 | 0          | 1     | 0     | 0  | 1      | 1     | 0    | 1     | 1 | 1 | 1               | 1      | 1      | 1        |
| chr2:68059800-68077075    | 17276     | 1    | 0 | 0          | 0     | 0     | 0  | 0      | 0     | 0    | 0     | 1 | 0 | 1               | 0      | 1      | 1        |
| chr5:32651700-32662150    | 10451     | 1    | 0 | 0          | 0     | 0     | 0  | 0      | 1     | 0    | 1     | 0 | 0 | 0               | 0      | 1      | 0        |
| chr4:25052450-25069275    | 16826     | 1    | 0 | 0          | 1     | 0     | 0  | 1      | 0     | 0    | 1     | 1 | 0 | 0               | 0      | 0      | 0        |
| chr14:70669500-70682000   | 12501     | 1    | 0 | 0          | 1     | 0     | 0  | 1      | 0     | 1    | 0     | 1 | 0 | 1               | 0      | 1      | 0        |
| chr13:90193525-90216950   | 23426     | 1    | 0 | 0          | 0     | 0     | 0  | 0      | 1     | 0    | 1     | 0 | 0 | 0               | 0      | 0      | 1        |
| chr4:108726075-108736900  | 10826     | 1    | 0 | 0          | 0     | 0     | 0  | 0      | 0     | 0    | 1     | 1 | 0 | 0               | 1      | 0      | 0        |
| chr6:112406400-112459300  | 52901     | 1    | 1 | 1          | 1     | 0     | 0  | 0      | 0     | 0    | 1     | 1 | 0 | 0               | 1      | 1      | 1        |
| chr11:127550150-127566775 | 16626     | 1    | 0 | 0          | 0     | 0     | 0  | 0      | 1     | 0    | 0     | 1 | 0 | 0               | 1      | 0      | 1        |
| chr18:45392375-45412075   | 19701     | 1    | 1 | 0          | 1     | 1     | 0  | 0      | 0     | 0    | 1     | 1 | 0 | 0               | 1      | 1      | 1        |
| chr8:24784000-24803475    | 19876     | 1    | 1 | 0          | 1     | 0     | 1  | 0      | 0     | 0    | 1     | 0 | 0 | 0               | 1      | 1      | 1        |
| chr5:125140075-125157500  | 17426     | 1    | 0 | 0          | 1     | 0     | 0  | 1      | 0     | 1    | 0     | 0 | 0 | 0               | 0      | 1      | 0        |
| chr4:102845400-102859100  | 13701     | 1    | 0 | 0          | 1     | 0     | 0  | 1      | 1     | 0    | 1     | 1 | 1 | 0               | 0      | 0      | 0        |
| chr2:176938125-176952700  | 14576     | 1    | 0 | 0          | 0     | 0     | 0  | 0      | 0     | 0    | 0     | 1 | 0 | 0               | 0      | 0      | 0        |
| chr1:190448450-190465925  | 17476     | 1    | 0 | 0          | 1     | 0     | 0  | 0      | 0     | 0    | 1     | 0 | 0 | 0               | 0      | 0      | 0        |
| chr12:115292100-115302600 | 10501     | 1    | 0 | 0          | 1     | 0     | 0  | 0      | 0     | 0    | 1     | 0 | 0 | 0               | 0      | 0      | 0        |
| chr15:47839050-47854350   | 15301     | 1    | 0 | 0          | 1     | 0     | 0  | 0      | 1     | 0    | 1     | 0 | 0 | 0               | 1      | 1      | 1        |
| chr16:82854175-82865325   | 11151     | 1    | 0 | 0          | 1     | 0     | 0  | 1      | 0     | 0    | 0     | 1 | 0 | 0               | 0      | 0      | 0        |
| chr2:223543900-223554575  | 10676     | 1    | 0 | 0          | 1     | 0     | 0  | 0      | 0     | 0    | 0     | 1 | 0 | 0               | 0      | 0      | 0        |
| chr2:231458400-231474450  | 16051     | 1    | 0 | 0          | 1     | 0     | 0  | 1      | 0     | 0    | 0     | 0 | 0 | 0               | 0      | 0      | 0        |
| chr2:237208375-237219525  | 11151     | 1    | 0 | 0          | 1     | 0     | 0  | 0      | 0     | 0    | 0     | 0 | 0 | 0               | 0      | 0      | 0        |
| chr2:71085625-71099625    | 14001     | 1    | 0 | 0          | 1     | 0     | 0  | 0      | 0     | 0    | 1     | 1 | 0 | 1               | 0      | 1      | 1        |
| chr20:2090500-2103375     | 12876     | 1    | 0 | 0          | 1     | 0     | 0  |        |       |      |       |   |   |                 |        |        |          |

| location                  | span (nt) | hypothalam |      |         |       |       |    |        |       |      |       | skeletal muscle | spleen | testes | Comments |  |
|---------------------------|-----------|------------|------|---------|-------|-------|----|--------|-------|------|-------|-----------------|--------|--------|----------|--|
|                           |           | max        | mean | adipose | colon | heart | us | kidney | liver | lung | ovary |                 |        |        |          |  |
| chrX:148733000-148752575  | 19576     | 1          | 0    | 0       | 0     | 0     | 0  | 1      | 0     | 0    | 0     | 0               | 0      | 1      | 0        |  |
| chr11:127986200-127997625 | 11426     | 1          | 0    | 0       | 1     | 1     | 0  | 0      | 0     | 0    | 0     | 0               | 0      | 0      | 0        |  |
| chr8:140183025-140239350  | 56326     | 1          | 0    | 0       | 1     | 0     | 0  | 1      | 0     | 0    | 0     | 0               | 0      | 0      | 0        |  |
| chr1:233220100-233231000  | 10901     | 1          | 0    | 0       | 0     | 0     | 0  | 0      | 0     | 0    | 0     | 1               | 0      | 0      | 0        |  |
| chr14:71447525-71461400   | 13876     | 1          | 0    | 0       | 1     | 0     | 0  | 0      | 0     | 0    | 1     | 0               | 0      | 1      | 1        |  |
| chr3:40986025-41002750    | 16726     | 1          | 0    | 0       | 0     | 0     | 0  | 0      | 0     | 0    | 0     | 0               | 0      | 0      | 0        |  |
| chr5:102017350-102033375  | 16026     | 1          | 0    | 0       | 0     | 0     | 0  | 0      | 0     | 0    | 0     | 0               | 0      | 0      | 1        |  |
| chr1:38888750-38900850    | 12101     | 1          | 0    | 0       | 1     | 0     | 0  | 1      | 0     | 0    | 0     | 0               | 0      | 0      | 0        |  |
| chr10:7584675-7594825     | 10151     | 1          | 0    | 0       | 1     | 0     | 0  | 0      | 0     | 0    | 0     | 0               | 0      | 0      | 0        |  |
| chr18:44239350-44253025   | 13676     | 1          | 0    | 0       | 1     | 0     | 0  | 0      | 0     | 0    | 0     | 0               | 0      | 0      | 0        |  |
| chr2:187440075-187467625  | 27551     | 1          | 0    | 0       | 1     | 0     | 0  | 0      | 0     | 0    | 1     | 0               | 0      | 0      | 1        |  |
| chr2:45358400-45376050    | 17651     | 1          | 0    | 0       | 1     | 0     | 0  | 0      | 0     | 0    | 0     | 0               | 0      | 0      | 0        |  |
| chr4:102619950-102632850  | 12901     | 1          | 0    | 0       | 1     | 0     | 0  | 1      | 0     | 0    | 0     | 0               | 0      | 1      | 0        |  |
| chr5:109275850-109296200  | 20351     | 1          | 0    | 1       | 1     | 0     | 0  | 1      | 0     | 0    | 1     | 0               | 1      | 1      | 1        |  |
| chr2:66891375-66902150    | 10776     | 1          | 0    | 0       | 0     | 0     | 0  | 0      | 0     | 0    | 1     | 0               | 1      | 1      | 1        |  |
| chr1:61193225-61207625    | 14401     | 1          | 0    | 0       | 0     | 0     | 1  | 0      | 0     | 0    | 1     | 0               | 1      | 1      | 1        |  |
| chr2:151418900-151431450  | 12551     | 1          | 0    | 0       | 0     | 0     | 0  | 1      | 0     | 1    | 1     | 1               | 0      | 1      | 1        |  |
| chr10:112221425-112232275 | 10851     | 1          | 0    | 0       | 0     | 0     | 0  | 0      | 0     | 1    | 1     | 1               | 0      | 1      | 1        |  |
| chr13:76807675-76829275   | 21601     | 1          | 0    | 0       | 1     | 0     | 0  | 1      | 0     | 1    | 0     | 0               | 1      | 0      | 1        |  |
| chr21:35050150-35061650   | 11501     | 1          | 0    | 0       | 1     | 0     | 0  | 0      | 0     | 0    | 0     | 0               | 1      | 1      | 0        |  |
| chr8:18025325-18043650    | 18326     | 1          | 0    | 0       | 0     | 0     | 0  | 1      | 0     | 1    | 1     | 0               | 0      | 1      | 1        |  |
| chr6:167428450-167439825  | 11376     | 1          | 0    | 0       | 0     | 0     | 0  | 1      | 0     | 0    | 0     | 0               | 0      | 1      | 1        |  |
| chr1:108865050-108879725  | 14676     | 1          | 0    | 0       | 0     | 0     | 0  | 1      | 0     | 0    | 1     | 1               | 0      | 1      | 1        |  |
| chr7:46184850-46198900    | 14051     | 1          | 0    | 0       | 0     | 0     | 0  | 1      | 0     | 0    | 1     | 0               | 0      | 0      | 0        |  |
| chr18:42451550-42482700   | 31151     | 1          | 0    | 0       | 1     | 0     | 0  | 0      | 0     | 0    | 0     | 0               | 0      | 0      | 0        |  |
| chr3:138272725-138291175  | 18451     | 1          | 0    | 0       | 1     | 0     | 0  | 0      | 0     | 0    | 0     | 0               | 0      | 0      | 0        |  |
| chr4:1743950-1756700      | 12751     | 1          | 0    | 0       | 1     | 0     | 0  | 0      | 0     | 0    | 0     | 0               | 0      | 0      | 0        |  |
| chr8:123825700-123843275  | 17576     | 1          | 0    | 0       | 1     | 0     | 0  | 1      | 0     | 0    | 0     | 0               | 0      | 0      | 1        |  |
| chr2:136867875-136878800  | 10926     | 1          | 0    | 0       | 1     | 1     | 0  | 0      | 0     | 1    | 1     | 0               | 1      | 0      | 1        |  |
| chr1:87457500-87472250    | 14751     | 1          | 0    | 0       | 1     | 0     | 0  | 1      | 0     | 0    | 1     | 0               | 0      | 0      | 0        |  |
| chrX:115315750-115327875  | 12126     | 1          | 0    | 0       | 0     | 0     | 0  | 1      | 0     | 0    | 0     | 0               | 0      | 0      | 0        |  |
| chr8:21182750-21199450    | 16701     | 1          | 0    | 0       | 1     | 0     | 0  | 0      | 0     | 0    | 0     | 0               | 0      | 0      | 1        |  |
| chr8:43637850-43650650    | 12801     | 1          | 0    | 0       | 0     | 0     | 0  | 0      | 0     | 1    | 0     | 0               | 0      | 1      | 0        |  |
| chr20:55589775-55605050   | 15276     | 1          | 0    | 0       | 0     | 0     | 0  | 1      | 0     | 0    | 0     | 0               | 0      | 0      | 0        |  |
| chr8:127449850-127469100  | 19251     | 1          | 0    | 0       | 0     | 0     | 0  | 0      | 0     | 0    | 0     | 0               | 0      | 0      | 0        |  |
| chr1:157472725-157487250  | 14526     | 1          | 0    | 0       | 1     | 0     | 0  | 0      | 0     | 0    | 0     | 0               | 0      | 0      | 0        |  |
| chr10:115138875-115151400 | 12526     | 1          | 0    | 0       | 1     | 0     | 0  | 0      | 0     | 0    | 0     | 0               | 0      | 0      | 0        |  |
| chr14:94916400-94934950   | 18551     | 1          | 0    | 0       | 1     | 0     | 0  | 0      | 0     | 0    | 0     | 0               | 1      | 0      | 0        |  |
| chr5:126931200-126948250  | 17051     | 1          | 0    | 0       | 0     | 0     | 0  | 0      | 0     | 1    | 0     | 0               | 1      | 0      | 1        |  |
| chr8:60131975-60143950    | 11976     | 1          | 0    | 0       | 0     | 1     | 0  | 1      | 0     | 0    | 1     | 0               | 1      | 0      | 1        |  |
| chr4:114929225-114940000  | 10776     | 1          | 0    | 0       | 0     | 1     | 0  | 1      | 0     | 0    | 1     | 0               | 0      | 0      | 0        |  |
| chr1:242310200-242327800  | 17601     | 1          | 0    | 0       | 1     | 0     | 0  | 0      | 0     | 1    | 0     | 0               | 0      | 0      | 0        |  |
| chr1:221930725-221941025  | 10901     | 1          | 0    | 0       | 0     | 0     | 0  | 0      | 0     | 0    | 1     | 0               | 0      | 0      | 1        |  |
| chr1:246337475-246347500  | 10026     | 1          | 0    | 0       | 0     | 0     | 0  | 1      | 0     | 0    | 1     | 0               | 0      | 0      | 1        |  |
| chr13:80059725-80075900   | 16176     | 1          | 0    | 0       | 0     | 0     | 0  | 0      | 0     | 0    | 0     | 0               | 0      | 0      | 1        |  |
| chr4:13730175-13740250    | 10076     | 1          | 0    | 0       | 0     | 0     | 0  | 1      | 0     | 0    | 0     | 0               | 0      | 0      | 0        |  |
| chr8:66160600-66171525    | 10926     | 1          | 0    | 0       | 0     | 0     | 0  | 1      | 0     | 0    | 1     | 0               | 0      | 0      | 0        |  |
| chr15:68065575-68082800   | 17226     | 1          | 0    | 1       | 1     | 0     | 1  | 0      | 0     | 0    | 0     | 0               | 0      | 0      | 1        |  |
| chr1:10834200-10846175    | 11976     | 1          | 0    | 0       | 1     | 0     | 0  | 1      | 0     | 0    | 0     | 0               | 0      | 0      | 0        |  |
| chr8:57739625-57750700    | 11076     | 1          | 0    | 0       | 0     | 0     | 0  | 0      | 0     | 0    | 1     | 0               | 0      | 0      | 1        |  |
| chr2:142652025-142668175  | 16151     | 1          | 0    | 0       | 1     | 0     | 0  | 0      | 0     | 0    | 1     | 0               | 0      | 0      | 0        |  |
| chr2:237859350-237869800  | 10451     | 1          | 0    | 0       | 0     | 0     | 0  | 0      | 0     | 0    | 1     | 0               | 0      | 0      | 0        |  |
| chr4:1021700-1040275      | 18576     | 1          | 0    | 0       | 1     | 0     | 0  | 0      | 1     | 0    | 0     | 1               | 0      | 0      | 0        |  |
| chr4:1589400-1605200      | 15801     | 1          | 0    | 0       | 0     | 0     | 0  | 0      | 0     | 0    | 1     | 1               | 0      | 1      | 1        |  |
| chr6:44847950-44860775    | 12826     | 1          | 0    | 0       | 0     | 0     | 0  | 1      | 0     | 0    | 0     | 0               | 0      | 0      | 1        |  |
| chr18:8443475-8460025     | 16551     | 1          | 0    | 0       | 0     | 0     | 0  | 0      | 0     | 0    | 1     | 0               | 1      | 0      | 1        |  |
| chr5:3790400-3802175      | 11776     | 1          | 0    | 0       | 1     | 0     | 0  | 1      | 0     | 1    | 1     | 0               | 1      | 0      | 1        |  |
| chrX:112619875-112636550  | 16676     | 1          | 0    | 0       | 0     | 0     | 0  | 0      | 0     | 1    | 0     | 0               | 0      | 1      | 0        |  |
| chr4:35430750-35443150    | 12401     | 1          | 0    | 0       | 0     | 0     | 0  | 0      | 0     | 0    | 0     | 0               | 0      | 0      | 1        |  |
| chr5:10822825-10832850    | 10026     | 1          | 0    | 0       | 0     | 0     | 0  | 0      | 0     | 0    | 0     | 0               | 0      | 0      | 1        |  |
| chr1:34594000-34611425    | 17426     | 1          | 0    | 0       | 1     | 0     | 0  | 0      | 0     | 0    | 0     | 0               | 0      | 0      | 0        |  |
| chr11:27837225-27857975   | 20751     | 1          | 0    | 0       | 1     | 0     | 0  | 0      | 0     | 0    | 0     | 0               | 0      | 0      | 0        |  |
| chr4:84893350-84907125    | 13776     | 1          | 0    | 0       | 1     | 0     | 0  | 0      | 0     | 0    | 0     | 0               | 0      | 0      | 0        |  |
| chr5:134674675-134685525  | 10851     | 1          | 0    | 0       | 1     | 0     | 0  | 0      | 0     | 0    | 0     | 0               | 0      | 0      | 0        |  |
| chr2:2821100-2843950      | 22851     | 1          | 0    | 1       | 0     | 0     | 1  | 0      | 0     | 0    | 0     | 0               | 0      | 0      | 0        |  |
| chr1:197930275-197948150  | 17876     | 1          | 0    | 0       | 0     | 0     | 0  | 0      | 0     | 0    | 1     | 0               | 1      | 0      | 1        |  |
| chr21:24182150-24197250   | 15101     | 1          | 0    | 0       | 0     | 0     | 0  | 0      | 0     | 0    | 0     | 0               | 0      | 0      | 1        |  |
| chr6:125885000-125895925  | 10926     | 1          | 0    | 0       | 0     | 0     | 0  | 0      | 0     | 0    | 0     | 0               | 0      | 0      | 1        |  |
| chr3:154809400-154830550  | 21151     | 1          | 0    | 0       | 0     | 0     | 0  | 0      | 0     | 1    | 1     | 0               | 0      | 0      | 1        |  |
| chr13:24548975-24561125   | 12151     | 1          | 0    | 0       | 1     | 1     | 0  | 1      | 0     | 1    | 1     | 0               | 0      | 0      | 0        |  |
| chr13:46522450-46536325   | 13876     | 1          | 0    | 0       | 0     | 0     | 0  | 1      | 0     | 0    | 0     | 0               | 0      | 0      | 1        |  |
| chr6:168331950-168343050  | 11101     | 1          | 0    | 0       | 0     | 0     | 0  | 0      | 1     | 0    | 0     | 0               | 0      | 0      | 0        |  |
| chr3:113997225-114007525  | 10301     | 1          | 0    | 0       | 0     | 0     | 1  | 0      | 0     | 0    | 1     | 0               | 0      | 0      | 1        |  |
| chr2:85812350-85823000    | 10651     | 1          | 0    | 0       | 1     | 0     | 0  | 0      | 0     | 0    | 1     | 0               | 0      | 0      | 1        |  |
| chr13:21203525-21215225   | 11701     | 1          | 0    | 0       | 1     | 0     | 0  | 0      | 0     | 0    | 0     | 0               | 0      | 0      | 0        |  |
| chr8:23939275-23950400    | 11126     | 1          | 0    | 0       | 1     | 0     | 1  | 0      | 0     | 0    | 0     | 0               | 0      | 0      | 0        |  |
| chr8:26092850-26111900    | 19051     | 1          | 0    | 0       | 1     | 0     | 1  | 0      | 0     | 0    | 0     | 0               | 0      | 0      | 0        |  |
| chr9:30714225-30736150    | 19026     | 1          | 0    | 0       | 1     | 0     | 0  | 0      | 0     | 0    | 0     | 0               | 0      | 0      | 1        |  |
| chr9:5192350-5206925      | 14576     | 1          | 0    | 0       | 1     | 0     | 0  | 0      | 0     | 0    | 1     | 0               | 0      | 0      | 1        |  |
| chr3:188363175-188375850  | 12676     | 1          | 0    | 0       | 1     | 0     | 0  | 0      | 0     | 1    | 0     | 0               | 1      | 0      | 1        |  |
| chr7:106276275-106286550  | 10276     | 1          | 0    | 0       | 0     | 0     | 0  | 0      | 0     | 0    | 1     | 0               | 1      | 0      | 1        |  |
| chr1:29914900-29928125    | 13226     | 1          | 0    | 0       | 0     | 0     | 0  | 0      | 0     | 0    | 1     | 0               | 0      | 0      | 0        |  |
| chr2:134177450-134192075  | 14626     | 1          | 0    | 0       | 0     | 1     | 0  | 0      | 0     | 0    | 1     | 0               | 0      | 0      | 0        |  |
| chr12:115504200-115514350 | 10151     | 1          | 0    | 0       | 1     | 0     | 0  | 0      | 0     | 1    | 0     | 0               | 0      | 0      | 0        |  |
| chr13:94306375-94318750   | 12376     | 1          | 0    | 0       | 1     | 0     | 0  | 0      | 0     | 0    | 0     | 0               | 0      | 0      | 0        |  |
| chr5:54380675-54392025    | 11351     | 1          | 0    | 0       | 1     | 0     | 0  | 0      | 0     | 0    | 0     | 0               | 0      | 0      | 0        |  |
| chr6:130952300-130967925  | 15626     | 1          | 0    | 0       | 1     | 0     | 0  | 0      | 0     | 0    | 0     | 0               | 0      | 0      | 0        |  |
| chr3:177853550-177864125  | 10576     | 1          | 0    | 0       | 0     | 0     | 0  | 0      | 0     | 0    | 0     | 0               | 0      | 0      | 1        |  |
| chr7:175450-189200        | 13751     | 1          | 0    | 0       | 0     | 0     | 0  | 0      | 0     | 0    | 0     | 0               | 0      | 1      | 0        |  |
| chr2:201342075-201354925  | 12851     | 1          | 0    | 0       | 0     | 0     | 1  | 0      | 0     | 0    | 0     | 0               | 0      | 0      | 0        |  |
| chr2:151669825-151682775  | 12951     | 1          | 0    | 0       | 0     | 0     | 0  | 0      | 0     | 0    | 0     | 0               | 0      | 0      | 1        |  |
| chr8:23664975-23675150    | 10176     | 1          | 0    | 0       | 0     | 0     | 0  | 0      | 0     | 0    | 1     | 0               | 0      | 0      | 0        |  |
| chrX:20329325-20341425    | 12101     | 1          | 0    | 0       | 0     | 0     | 0  | 0      | 0     | 0    | 1     | 0               | 0      | 0      | 0        |  |
| chr2:145864000-145902775  | 38776     | 1          | 0    | 0       | 1     | 0     | 0  | 1      | 0     | 0    | 1     | 0               | 1      | 0      | 1        |  |
| chr6:34632150-34647850    | 15701     | 1          | 0    | 0</     |       |       |    |        |       |      |       |                 |        |        |          |  |

| location                  | span (nt) | max  |         | hypothalam |       |    |        |       |      |       |        | skeletal muscle |   | spleen | testes | Comments |
|---------------------------|-----------|------|---------|------------|-------|----|--------|-------|------|-------|--------|-----------------|---|--------|--------|----------|
|                           |           | mean | adipose | colon      | heart | us | kidney | liver | lung | ovary | muscle |                 |   |        |        |          |
| chr1:2185000-2195750      | 10751     | 1    | 0       | 0          | 1     | 0  | 0      | 0     | 0    | 0     | 0      | 0               | 0 | 0      | 0      |          |
| chr1:103304175-103316475  | 12301     | 1    | 0       | 0          | 1     | 0  | 0      | 0     | 0    | 0     | 0      | 0               | 0 | 0      | 0      |          |
| chr2:118641200-118655500  | 14351     | 1    | 0       | 0          | 1     | 0  | 0      | 0     | 0    | 0     | 0      | 0               | 0 | 0      | 0      |          |
| chr4:117477050-117499075  | 22026     | 1    | 0       | 0          | 1     | 0  | 0      | 0     | 0    | 0     | 0      | 0               | 0 | 0      | 0      |          |
| chr5:3618525-3632100      | 13576     | 1    | 0       | 0          | 1     | 0  | 0      | 0     | 0    | 0     | 0      | 0               | 0 | 0      | 0      |          |
| chr9:12944125-12955625    | 11501     | 1    | 0       | 0          | 0     | 0  | 0      | 0     | 0    | 1     | 0      | 0               | 0 | 0      | 0      |          |
| chr18:58292100-58302600   | 10501     | 1    | 0       | 0          | 0     | 0  | 0      | 0     | 0    | 0     | 0      | 0               | 1 | 0      | 0      |          |
| chr5:65876625-65888825    | 12201     | 1    | 0       | 0          | 0     | 0  | 0      | 0     | 0    | 0     | 0      | 0               | 0 | 1      | 0      |          |
| chr8:102348200-102365375  | 17176     | 1    | 0       | 0          | 0     | 0  | 0      | 0     | 0    | 0     | 0      | 0               | 0 | 1      | 0      |          |
| chr10:64272675-64282950   | 10276     | 1    | 0       | 0          | 0     | 0  | 0      | 0     | 0    | 0     | 0      | 0               | 0 | 0      | 1      |          |
| chr18:74372500-74382950   | 10451     | 1    | 0       | 0          | 0     | 0  | 0      | 0     | 0    | 0     | 0      | 0               | 0 | 0      | 1      |          |
| chr2:59937350-59959625    | 22276     | 1    | 0       | 0          | 0     | 0  | 0      | 1     | 0    | 0     | 0      | 0               | 0 | 0      | 0      |          |
| chr13:68163750-68188075   | 24326     | 0    | 0       | 0          | 0     | 0  | 0      | 0     | 0    | 0     | 0      | 0               | 0 | 0      | 0      |          |
| chr14:60768300-60778400   | 10101     | 0    | 0       | 0          | 0     | 0  | 0      | 0     | 0    | 0     | 0      | 0               | 0 | 0      | 0      |          |
| chr16:77894925-77907775   | 12851     | 0    | 0       | 0          | 0     | 0  | 0      | 0     | 0    | 0     | 0      | 0               | 0 | 0      | 0      |          |
| chr12:36728900-36740300   | 11401     | 0    | 0       | 0          | 0     | 0  | 0      | 0     | 0    | 0     | 0      | 0               | 0 | 0      | 0      |          |
| chr16:49113275-49131950   | 18676     | 0    | 0       | 0          | 0     | 0  | 0      | 0     | 0    | 0     | 0      | 0               | 0 | 0      | 0      |          |
| chr3:16732325-16743650    | 11326     | 0    | 0       | 0          | 0     | 0  | 0      | 0     | 0    | 0     | 0      | 0               | 0 | 0      | 0      |          |
| chr4:97235825-97246525    | 10701     | 0    | 0       | 0          | 0     | 0  | 0      | 0     | 0    | 0     | 0      | 0               | 0 | 0      | 0      |          |
| chr5:171923650-171936650  | 13001     | 0    | 0       | 0          | 0     | 0  | 0      | 0     | 0    | 0     | 0      | 0               | 0 | 0      | 0      |          |
| chr2:235101975-235113800  | 11826     | 0    | 0       | 0          | 0     | 0  | 0      | 0     | 0    | 0     | 0      | 0               | 0 | 0      | 0      |          |
| chr11:101930825-101946125 | 15301     | 0    | 0       | 0          | 0     | 0  | 0      | 0     | 0    | 0     | 0      | 0               | 0 | 0      | 0      |          |
| chr5:1006500-1016800      | 10301     | 0    | 0       | 0          | 0     | 0  | 0      | 0     | 0    | 0     | 0      | 0               | 0 | 0      | 0      |          |
| chr10:33691650-33706325   | 14676     | 0    | 0       | 0          | 0     | 0  | 0      | 0     | 0    | 0     | 0      | 0               | 0 | 0      | 0      |          |
| chr5:2915250-2928275      | 13026     | 0    | 0       | 0          | 0     | 0  | 0      | 0     | 0    | 0     | 0      | 0               | 0 | 0      | 0      |          |
| chr8:37650675-37661525    | 10851     | 0    | 0       | 0          | 0     | 0  | 0      | 0     | 0    | 0     | 0      | 0               | 0 | 0      | 0      |          |
| chr18:35727600-35746750   | 19151     | 0    | 0       | 0          | 0     | 0  | 0      | 0     | 0    | 0     | 0      | 0               | 0 | 0      | 0      |          |
| chr13:19779350-19796600   | 20251     | 0    | 0       | 0          | 0     | 0  | 0      | 0     | 0    | 0     | 0      | 0               | 0 | 0      | 0      |          |
| chr13:21343525-21353675   | 10151     | 0    | 0       | 0          | 0     | 0  | 0      | 0     | 0    | 0     | 0      | 0               | 0 | 0      | 0      |          |
| chr2:107085125-107104250  | 19126     | 0    | 0       | 0          | 0     | 0  | 0      | 0     | 0    | 0     | 0      | 0               | 0 | 0      | 0      |          |
| chr8:49778575-49789975    | 11401     | 0    | 0       | 0          | 0     | 0  | 0      | 0     | 0    | 0     | 0      | 0               | 0 | 0      | 0      |          |
| chr8:97516400-97526500    | 10101     | 0    | 0       | 0          | 0     | 0  | 0      | 0     | 0    | 0     | 0      | 0               | 0 | 0      | 0      |          |
| chr4:59170525-59185400    | 14876     | 0    | 0       | 0          | 0     | 0  | 0      | 0     | 0    | 0     | 0      | 0               | 0 | 0      | 0      |          |
| chr7:25523625-25539425    | 15801     | 0    | 0       | 0          | 0     | 0  | 0      | 0     | 0    | 0     | 0      | 0               | 0 | 0      | 0      |          |
| chr1:46758275-46770275    | 12001     | 0    | 0       | 0          | 0     | 0  | 0      | 0     | 0    | 0     | 0      | 0               | 0 | 0      | 0      |          |
| chr4:99827550-99842325    | 14776     | 0    | 0       | 0          | 0     | 0  | 0      | 0     | 0    | 0     | 0      | 0               | 0 | 0      | 0      |          |
| chr7:92334500-92344850    | 10351     | 0    | 0       | 0          | 0     | 0  | 0      | 0     | 0    | 0     | 0      | 0               | 0 | 0      | 0      |          |
| chr6:89328975-89341875    | 12901     | 0    | 0       | 0          | 0     | 0  | 0      | 0     | 0    | 0     | 0      | 0               | 0 | 0      | 0      |          |
| chr10:62230700-62240900   | 10201     | 0    | 0       | 0          | 0     | 0  | 0      | 0     | 0    | 0     | 0      | 0               | 0 | 0      | 0      |          |
| chr8:20493075-20506350    | 13276     | 0    | 0       | 0          | 0     | 0  | 0      | 0     | 0    | 0     | 0      | 0               | 0 | 0      | 0      |          |
| chr7:124822950-124833175  | 10226     | 0    | 0       | 0          | 0     | 0  | 0      | 0     | 0    | 0     | 0      | 0               | 0 | 0      | 0      |          |
| chr4:3799650-3822500      | 23451     | 0    | 0       | 0          | 0     | 0  | 0      | 0     | 0    | 0     | 0      | 0               | 0 | 0      | 0      |          |
| chr14:100197725-100219000 | 21276     | 0    | 0       | 0          | 0     | 0  | 0      | 0     | 0    | 0     | 0      | 0               | 0 | 0      | 0      |          |
| chr3:41141450-41163950    | 24501     | 0    | 0       | 0          | 0     | 0  | 0      | 0     | 0    | 0     | 0      | 0               | 0 | 0      | 0      |          |
| chr1:155711350-155725225  | 13876     | 0    | 0       | 0          | 0     | 0  | 0      | 0     | 0    | 0     | 0      | 0               | 0 | 0      | 0      |          |
| chr3:169303700-169322700  | 19001     | 0    | 0       | 0          | 0     | 0  | 0      | 0     | 0    | 0     | 0      | 0               | 0 | 0      | 0      |          |
| chr1:100547525-100561800  | 14276     | 0    | 0       | 0          | 0     | 0  | 0      | 0     | 0    | 0     | 0      | 0               | 0 | 0      | 0      |          |
| chr12:66912600-66922875   | 10276     | 0    | 0       | 0          | 0     | 0  | 0      | 0     | 0    | 0     | 0      | 0               | 0 | 0      | 0      |          |
| chr6:3426225-3440625      | 14401     | 0    | 0       | 0          | 0     | 0  | 0      | 0     | 0    | 0     | 0      | 0               | 0 | 0      | 0      |          |
| chr7:154606775-154624950  | 18176     | 0    | 0       | 0          | 0     | 0  | 0      | 0     | 0    | 0     | 0      | 0               | 0 | 0      | 0      |          |
| chr21:22930950-22941850   | 10901     | 0    | 0       | 0          | 0     | 0  | 0      | 0     | 0    | 0     | 0      | 0               | 0 | 0      | 0      |          |
| chr18:10070425-10083725   | 13301     | 0    | 0       | 0          | 0     | 0  | 0      | 0     | 0    | 0     | 0      | 0               | 0 | 0      | 0      |          |
| chr5:41915550-41927950    | 12401     | 0    | 0       | 0          | 0     | 0  | 0      | 0     | 0    | 0     | 0      | 0               | 0 | 0      | 0      |          |
| chr4:6608650-6619000      | 10351     | 0    | 0       | 0          | 0     | 0  | 0      | 0     | 0    | 0     | 0      | 0               | 0 | 0      | 0      |          |
| chr9:6054675-6064900      | 10226     | 0    | 0       | 0          | 0     | 0  | 0      | 0     | 0    | 0     | 0      | 0               | 0 | 0      | 0      |          |
| chr10:4568200-4583225     | 15026     | 0    | 0       | 0          | 0     | 0  | 0      | 0     | 0    | 0     | 0      | 0               | 0 | 0      | 0      |          |
| chr1:226789375-226804525  | 15151     | 0    | 0       | 0          | 0     | 0  | 0      | 0     | 0    | 0     | 0      | 0               | 0 | 0      | 0      |          |
| chrX:68323375-68348925    | 25551     | 0    | 0       | 0          | 0     | 0  | 0      | 0     | 0    | 0     | 0      | 0               | 0 | 0      | 0      |          |
| chr11:29287925-29298875   | 10951     | 0    | 0       | 0          | 0     | 0  | 0      | 0     | 0    | 0     | 0      | 0               | 0 | 0      | 0      |          |
| chr12:90728475-90738500   | 10026     | 0    | 0       | 0          | 0     | 0  | 0      | 0     | 0    | 0     | 0      | 0               | 0 | 0      | 0      |          |
| chr5:9972325-9986625      | 14301     | 0    | 0       | 0          | 0     | 0  | 0      | 0     | 0    | 0     | 0      | 0               | 0 | 0      | 0      |          |
| chr8:109813675-109824100  | 10426     | 0    | 0       | 0          | 0     | 0  | 0      | 0     | 0    | 0     | 0      | 0               | 0 | 0      | 0      |          |
| chr1:230573375-230588800  | 15426     | 0    | 0       | 0          | 0     | 0  | 0      | 0     | 0    | 0     | 0      | 0               | 0 | 0      | 0      |          |
| chr13:27285150-27300025   | 14876     | 0    | 0       | 0          | 0     | 0  | 0      | 0     | 0    | 0     | 0      | 0               | 0 | 0      | 0      |          |
| chr16:84629500-84646475   | 16976     | 0    | 0       | 0          | 0     | 0  | 0      | 0     | 0    | 0     | 0      | 0               | 0 | 0      | 0      |          |
| chr18:71985450-71997700   | 12251     | 0    | 0       | 0          | 0     | 0  | 0      | 0     | 0    | 0     | 0      | 0               | 0 | 0      | 0      |          |
| chr8:47056500-47068675    | 12176     | 0    | 0       | 0          | 0     | 0  | 0      | 0     | 0    | 0     | 0      | 0               | 0 | 0      | 0      |          |
| chr2:151317425-151330125  | 12701     | 0    | 0       | 0          | 0     | 0  | 0      | 0     | 0    | 0     | 0      | 0               | 0 | 0      | 0      |          |
| chr20:24726575-24738550   | 11976     | 0    | 0       | 0          | 0     | 0  | 0      | 0     | 0    | 0     | 0      | 0               | 0 | 0      | 0      |          |
| chr2:129258125-129268825  | 10701     | 0    | 0       | 0          | 0     | 0  | 0      | 0     | 0    | 0     | 0      | 0               | 0 | 0      | 0      |          |
| chr4:115617300-115634500  | 17201     | 0    | 0       | 0          | 0     | 0  | 0      | 0     | 0    | 0     | 0      | 0               | 0 | 0      | 0      |          |
| chr8:117684425-117694800  | 10376     | 0    | 0       | 0          | 0     | 0  | 0      | 0     | 0    | 0     | 0      | 0               | 0 | 0      | 0      |          |
| chr15:75899850-75913050   | 13201     | 0    | 0       | 0          | 0     | 0  | 0      | 0     | 0    | 0     | 0      | 0               | 0 | 0      | 0      |          |
| chr3:980375-1000225       | 19851     | 0    | 0       | 0          | 0     | 0  | 0      | 0     | 0    | 0     | 0      | 0               | 0 | 0      | 0      |          |
| chrX:136212300-136224525  | 12226     | 0    | 0       | 0          | 0     | 0  | 0      | 0     | 0    | 0     | 0      | 0               | 0 | 0      | 0      |          |
| chr5:124766050-124776075  | 10026     | 0    | 0       | 0          | 0     | 0  | 0      | 0     | 0    | 0     | 0      | 0               | 0 | 0      | 0      |          |
| chr1:54355225-54366425    | 10201     | 0    | 0       | 0          | 0     | 0  | 0      | 0     | 0    | 0     | 0      | 0               | 0 | 0      | 0      |          |
| chr10:7972425-79793050    | 10626     | 0    | 0       | 0          | 0     | 0  | 0      | 0     | 0    | 0     | 0      | 0               | 0 | 0      | 0      |          |
| chr10:80083325-80095925   | 12601     | 0    | 0       | 0          | 0     | 0  | 0      | 0     | 0    | 0     | 0      | 0               | 0 | 0      | 0      |          |
| chr17:44887200-44904100   | 16901     | 0    | 0       | 0          | 0     | 0  | 0      | 0     | 0    | 0     | 0      | 0               | 0 | 0      | 0      |          |
| chr18:20536500-20537775   | 11276     | 0    | 0       | 0          | 0     | 0  | 0      | 0     | 0    | 0     | 0      | 0               | 0 | 0      | 0      |          |
| chr3:53148200-53163075    | 14876     | 0    | 0       | 0          | 0     | 0  | 0      | 0     | 0    | 0     | 0      | 0               | 0 | 0      | 0      |          |
| chr13:75360325-75373025   | 12701     | 0    | 0       | 0          | 0     | 0  | 0      | 0     | 0    | 0     | 0      | 0               | 0 | 0      | 0      |          |
| chr11:13877025-13889575   | 12551     | 0    | 0       | 0          | 0     | 0  | 0      | 0     | 0    | 0     | 0      | 0               | 0 | 0      | 0      |          |
| chr8:29804225-29817650    | 13426     | 0    | 0       | 0          | 0     | 0  | 0      | 0     | 0    | 0     | 0      | 0               | 0 | 0      | 0      |          |
| chr13:104555125-104567000 | 11876     | 0    | 0       | 0          | 0     | 0  | 0      | 0     | 0    | 0     | 0      | 0               | 0 | 0      | 0      |          |
| chr13:31280650-31291700   | 11051     | 0    | 0       | 0          | 0     | 0  | 0      | 0     | 0    | 0     | 0      | 0               | 0 | 0      | 0      |          |
| chr1:242433950-242449875  | 15926     | 0    | 0       | 0          | 0     | 0  | 0      | 0     | 0    | 0     | 0      | 0               | 0 | 0      | 0      |          |
| chr14:98295825-98307425   | 11601     | 0    | 0       | 0          | 0     | 0  | 0      | 0     | 0    | 0     | 0      | 0               | 0 | 0      | 0      |          |
| chr3:71002675-71016650    | 13976     | 0    | 0       | 0          | 0     | 0  | 0      | 0     | 0    | 0     | 0      | 0               | 0 | 0      | 0      |          |
| chr6:91184500-91207375    | 22876     | 0    | 0       | 0          | 0     | 0  | 0      | 0     | 0    | 0     | 0      | 0               | 0 | 0      | 0      |          |
| chr7:129188850-129205475  | 16626     | 0    | 0       | 0          | 0     | 0  | 0      | 0     | 0    | 0     | 0      | 0               | 0 | 0      | 0      |          |
| chr6:63131625-63144250    | 12626     | 0    | 0       | 0          | 0     | 0  | 0      | 0     | 0    | 0     | 0      | 0               | 0 | 0      | 0      |          |
| chr1:84487175-84498675    | 11501     | 0    | 0       | 0          | 0     | 0  | 0      | 0     | 0    | 0     | 0      | 0               | 0 | 0      | 0      |          |
| chr1:150676175-150689200  | 13026     | 0    | 0       | 0          | 0     | 0  | 0      | 0     | 0    | 0     | 0      | 0               | 0 | 0      | 0      |          |
| chr2:234704700-234716175  | 11476     | 0    | 0       | 0          | 0     | 0  | 0      | 0     | 0    | 0     | 0      | 0               | 0 | 0      | 0      |          |
| chr11:12043925-12055650   | 11726     | 0    | 0       | 0          | 0     | 0  | 0      | 0     | 0    | 0     | 0      | 0               | 0 | 0      | 0      |          |
| chr18:69751425-69764700   | 13276     | 0    | 0       | 0          | 0     |    |        |       |      |       |        |                 |   |        |        |          |
